# Supplementary material for: Global burden of primary liver cancer by five etiologies and global prediction by 2035 based on global burden of disease study 2019
Source: PubMed Central journal article supplement (PMC8894698; doi:10.1002/cam4.4551), 2022-02-04

A

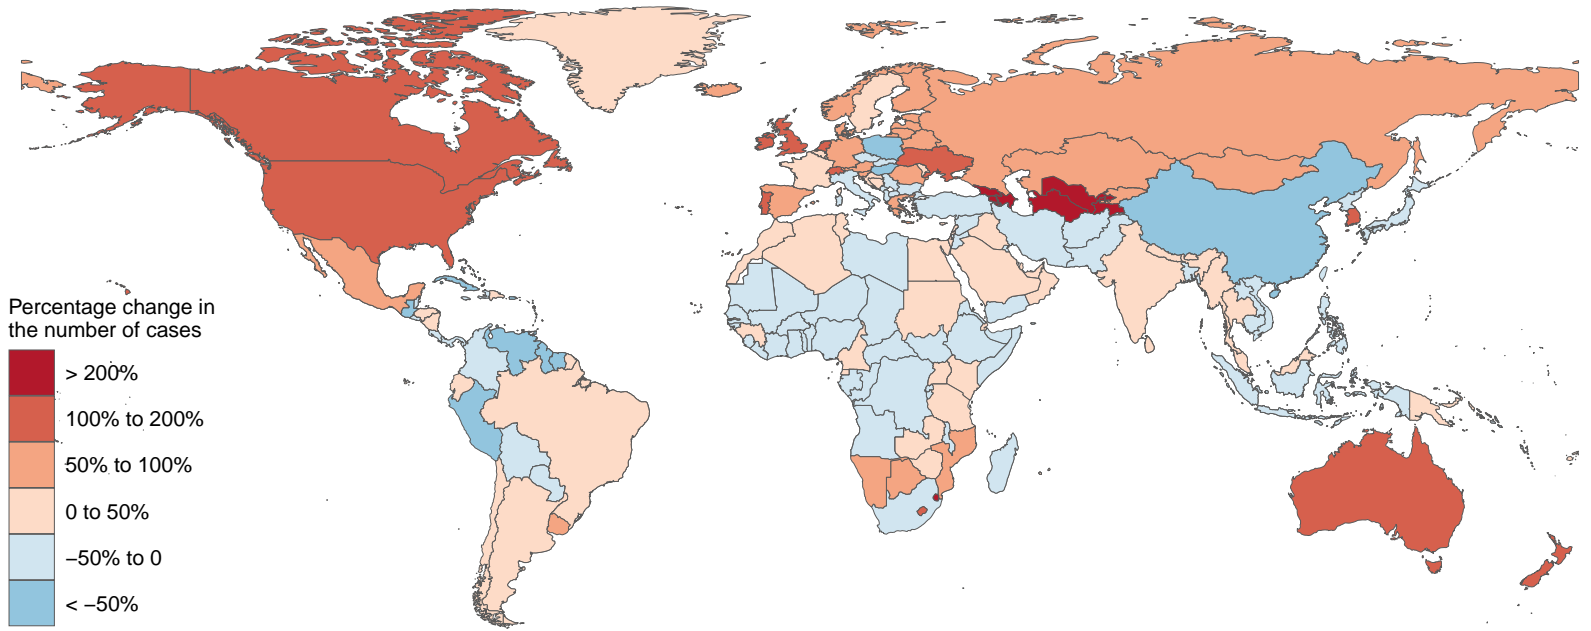

B

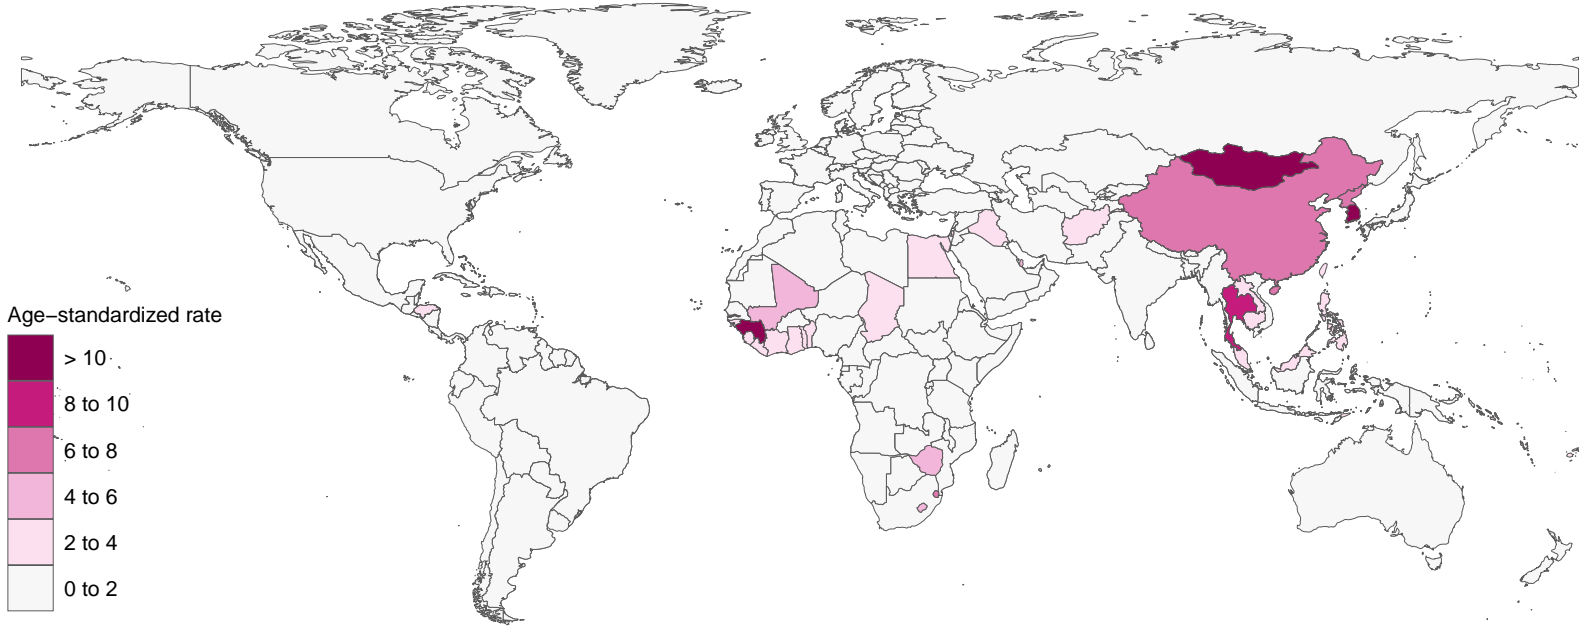

C

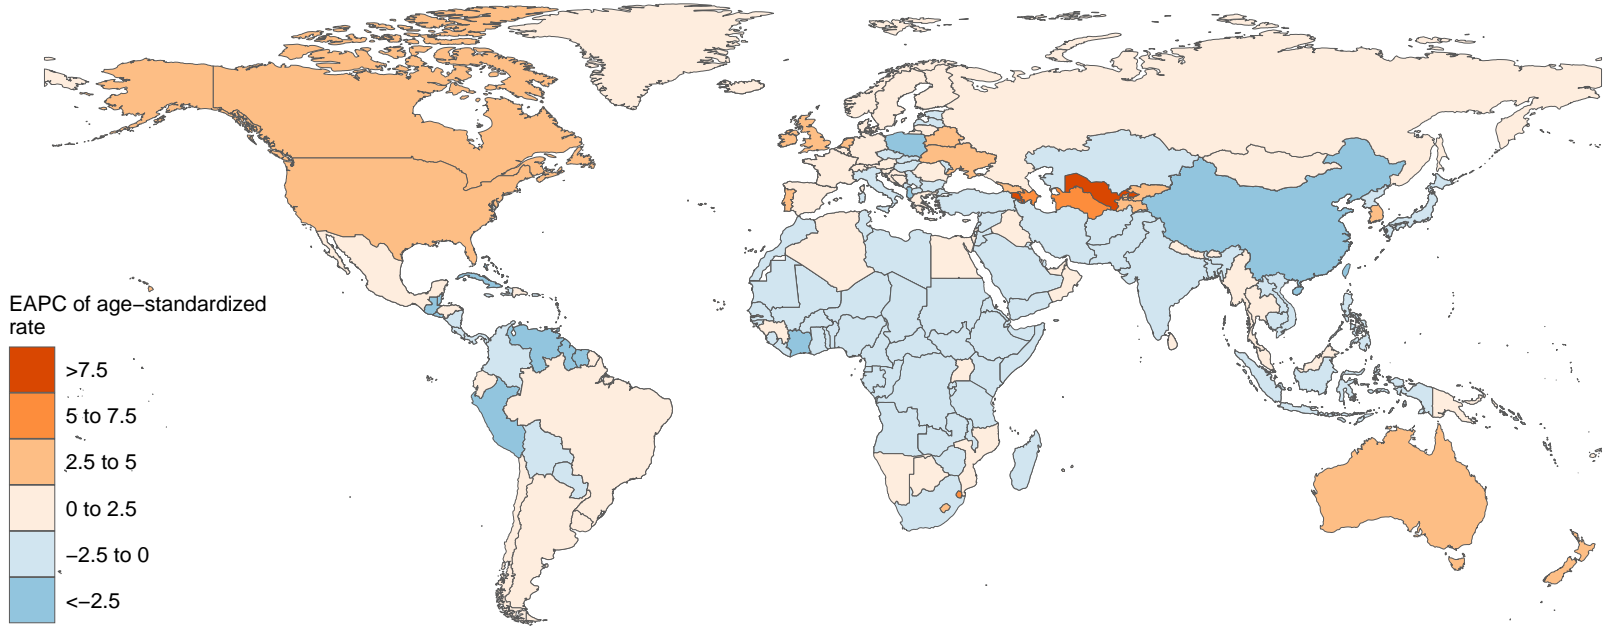

D

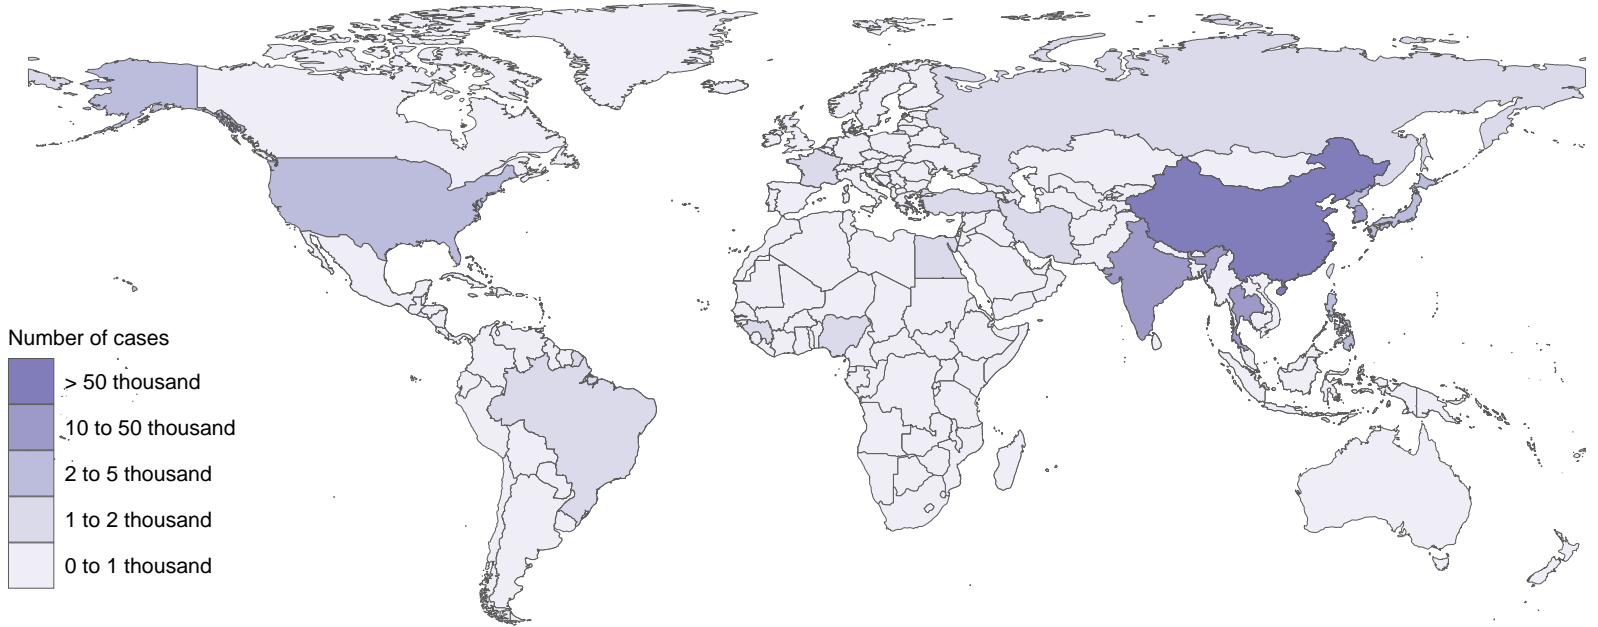

E

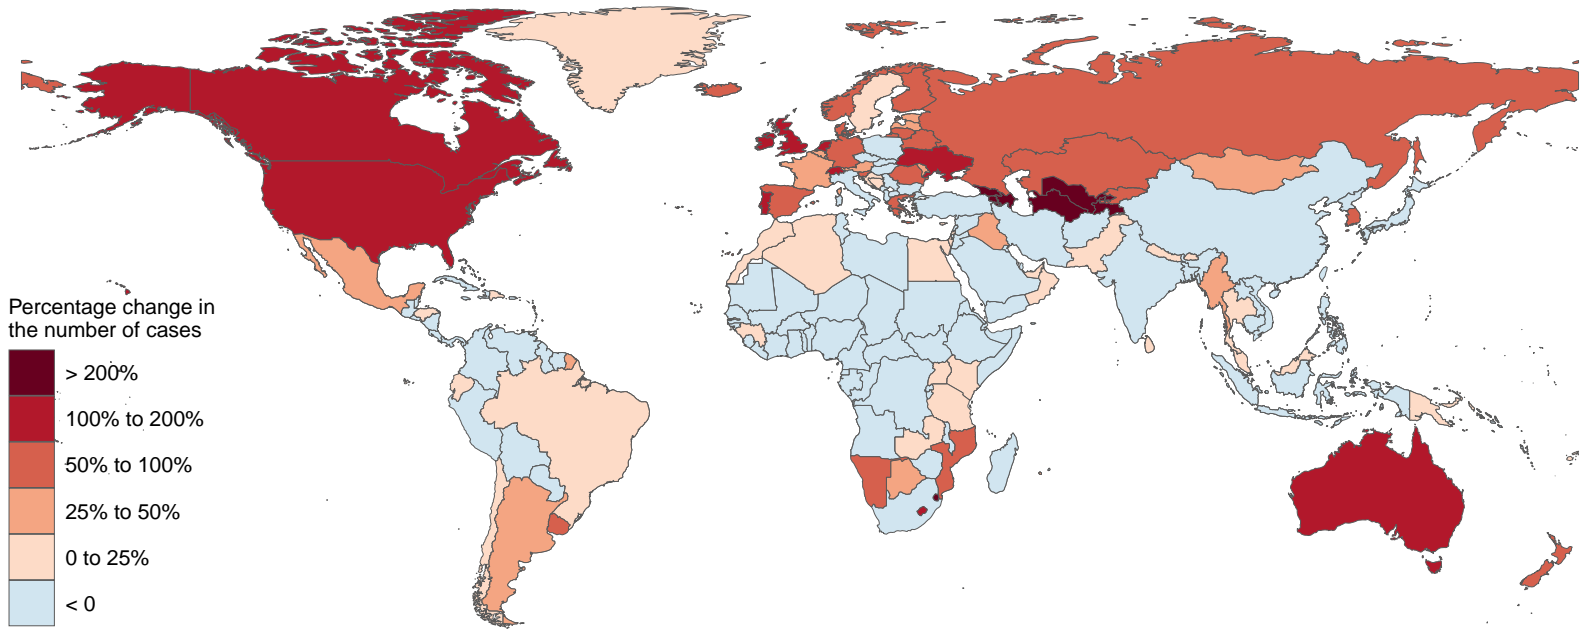

F

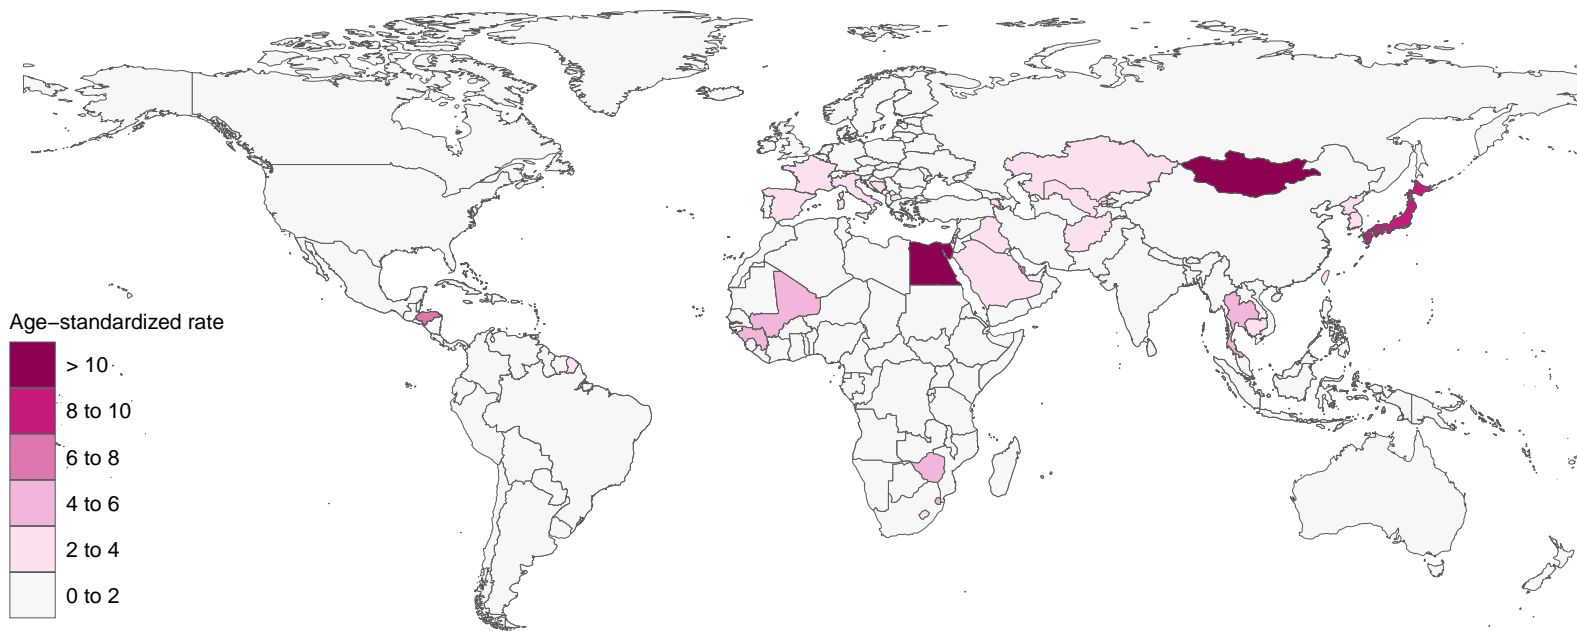

G

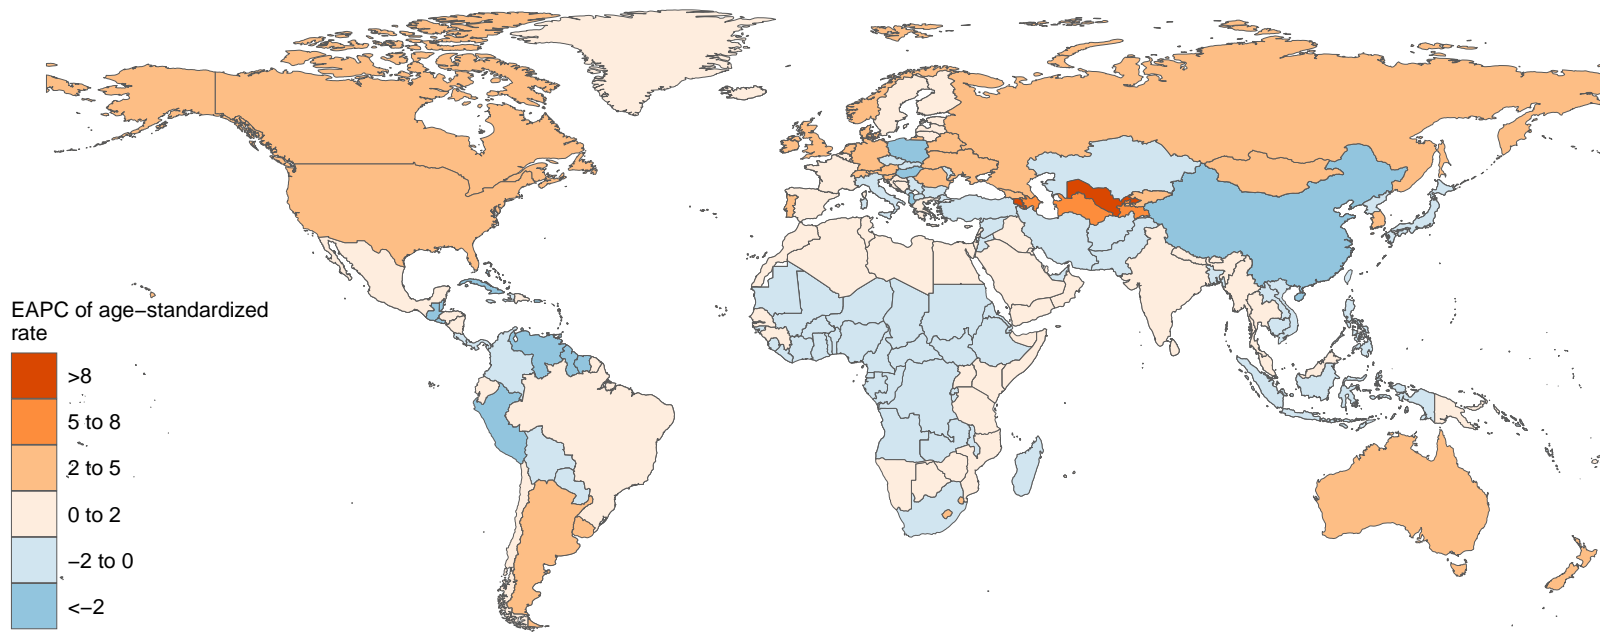

H

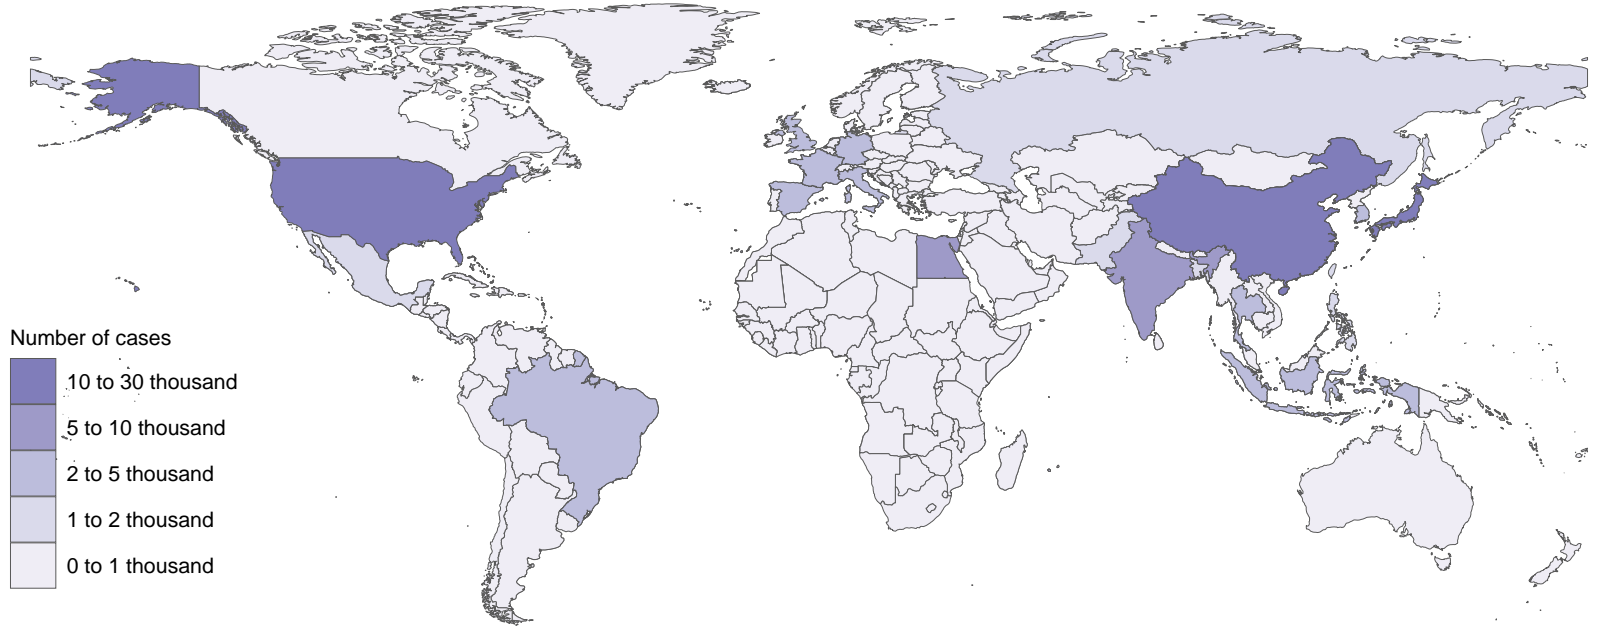



I

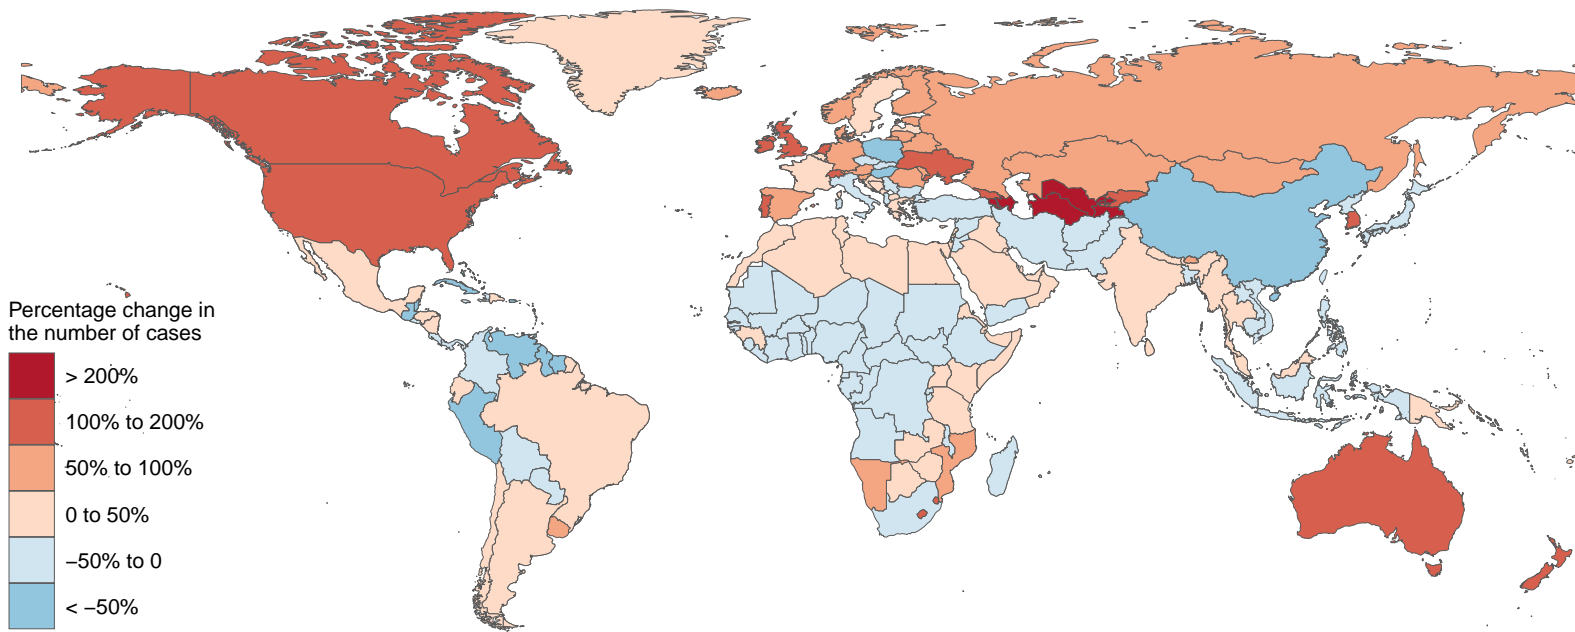

J

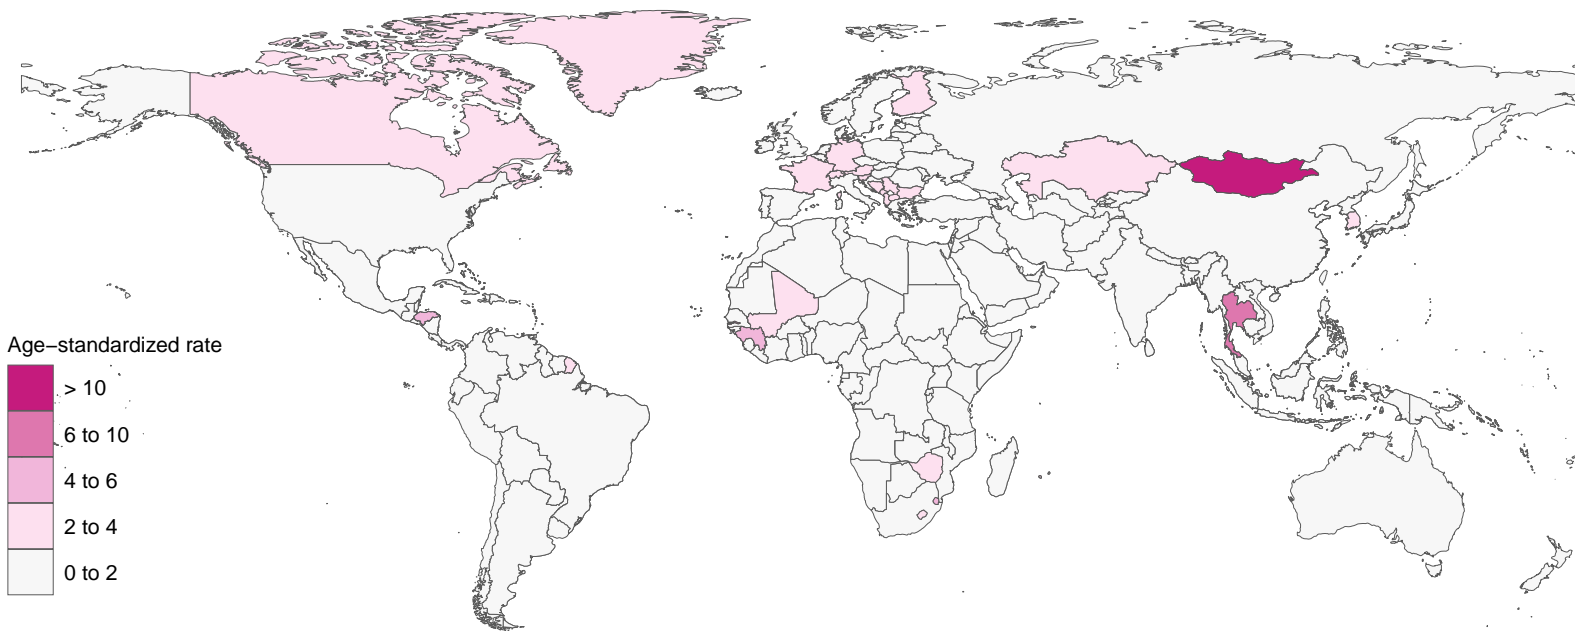

K

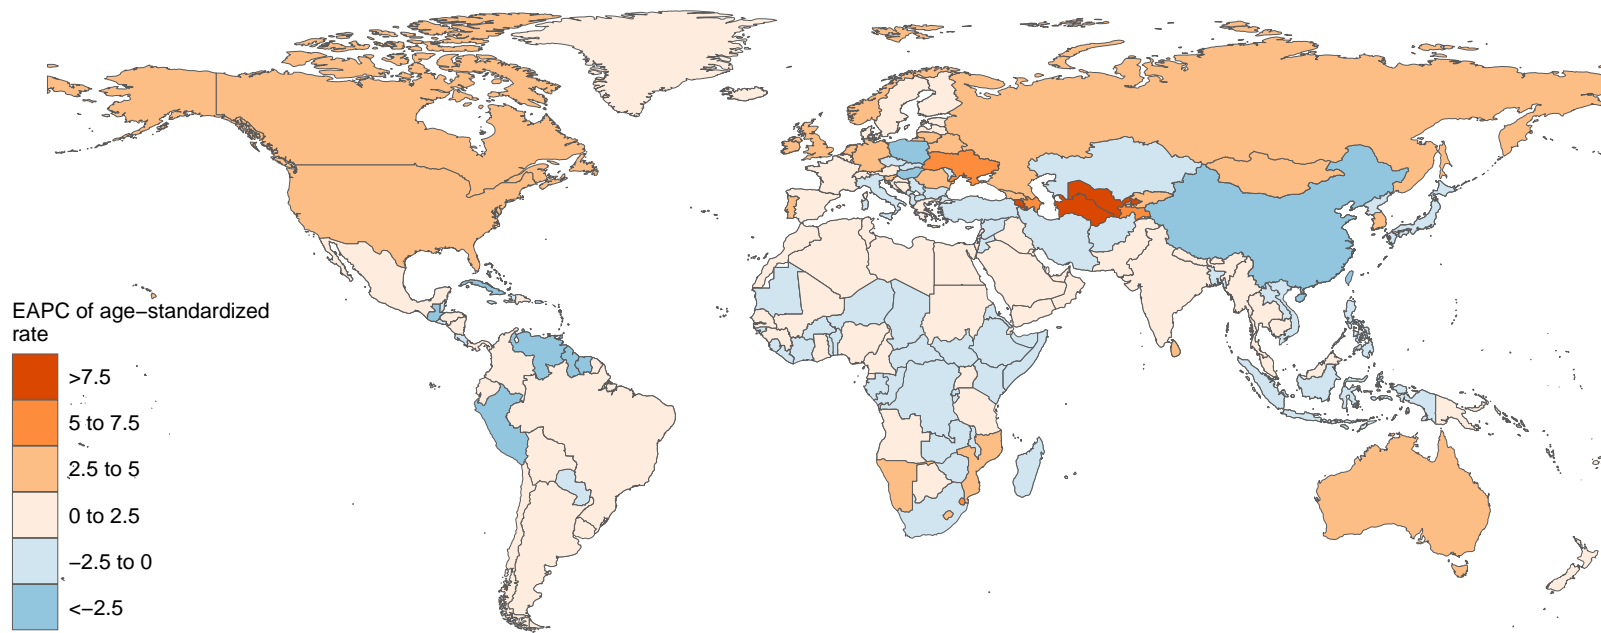

L

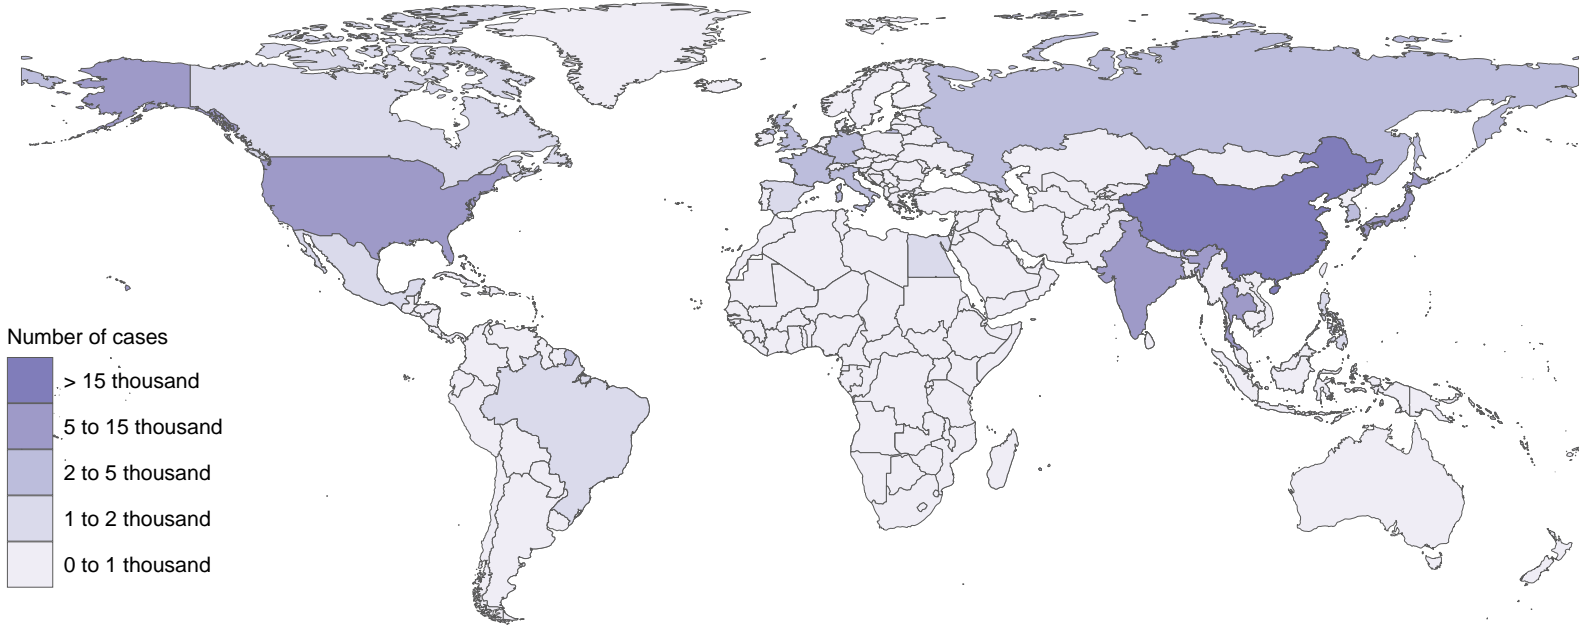

M

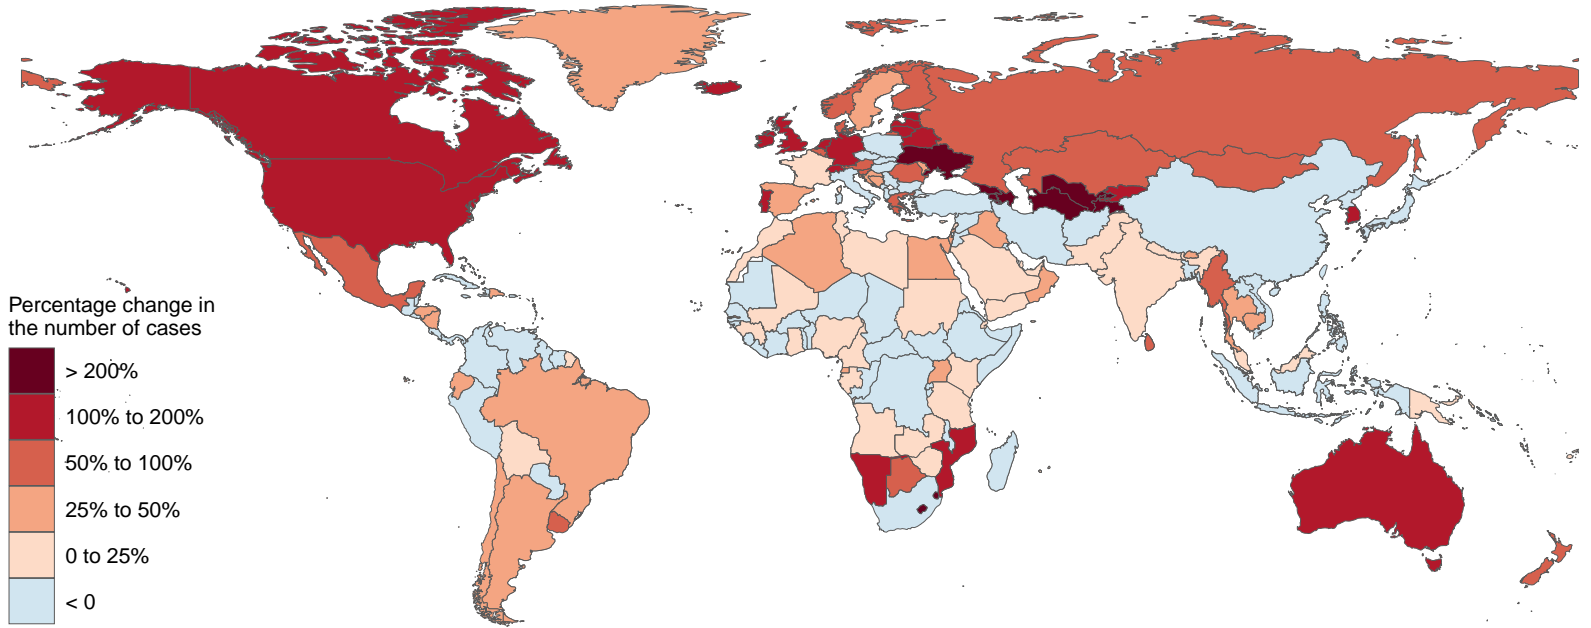

N

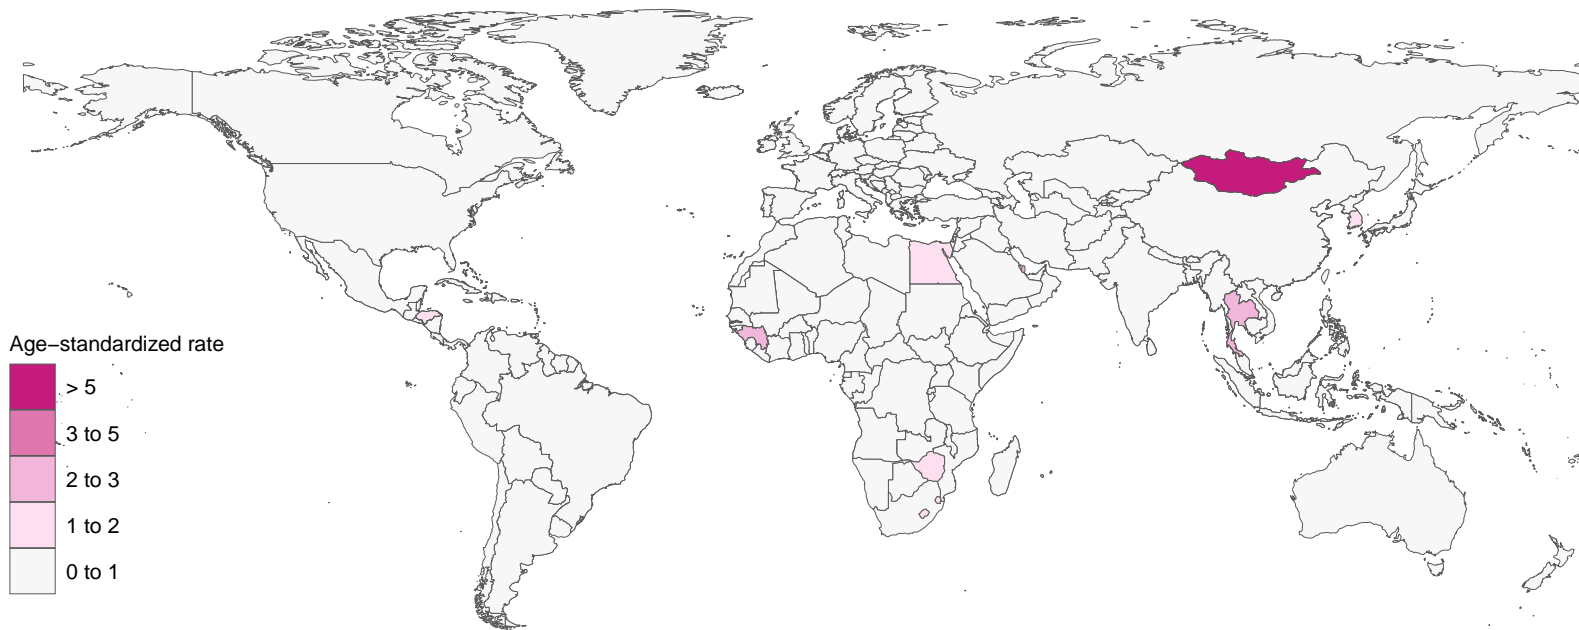

0

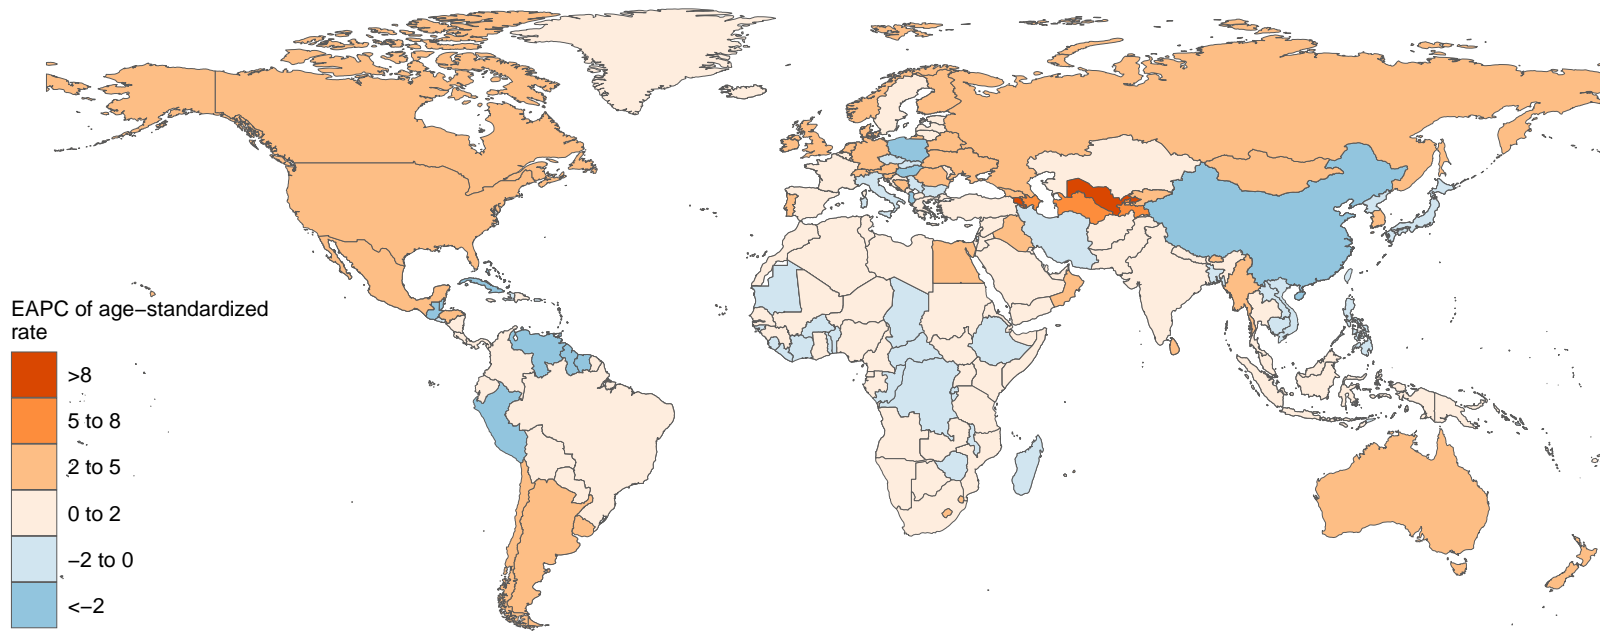

P

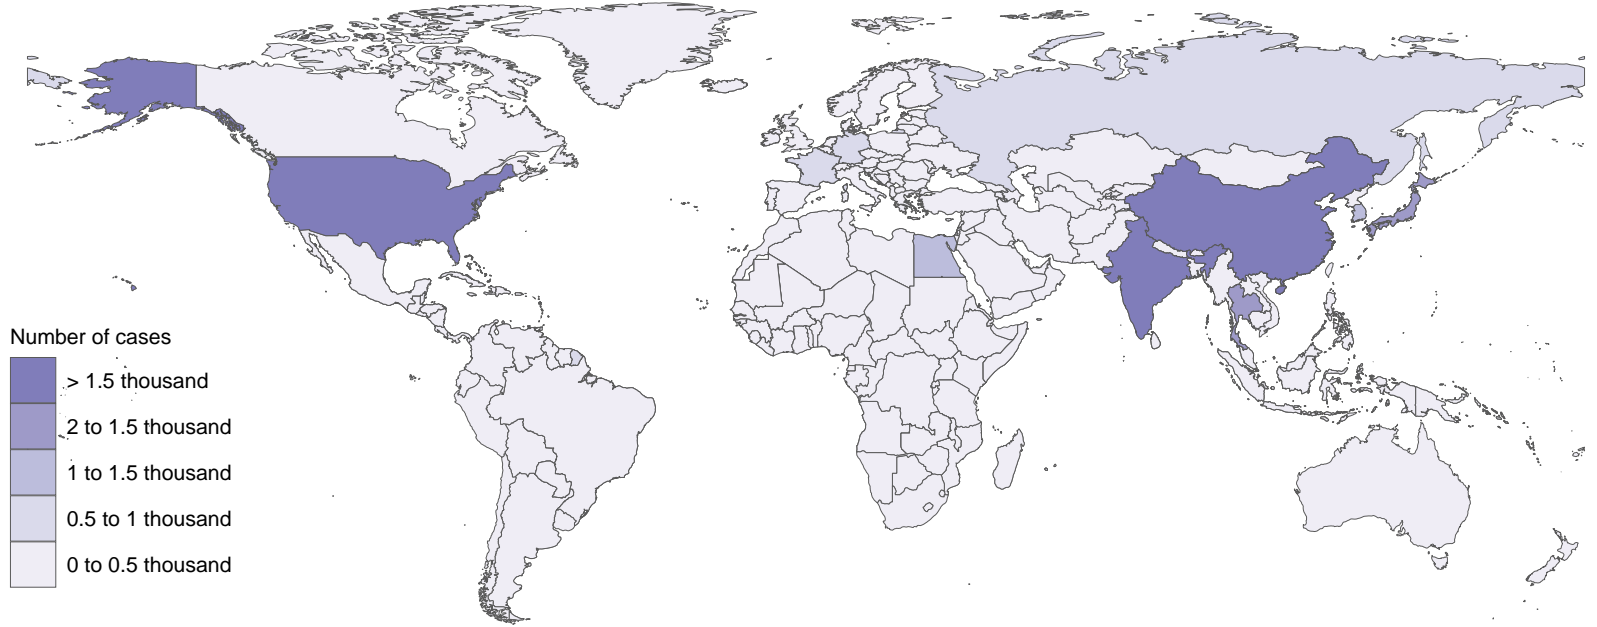



Q

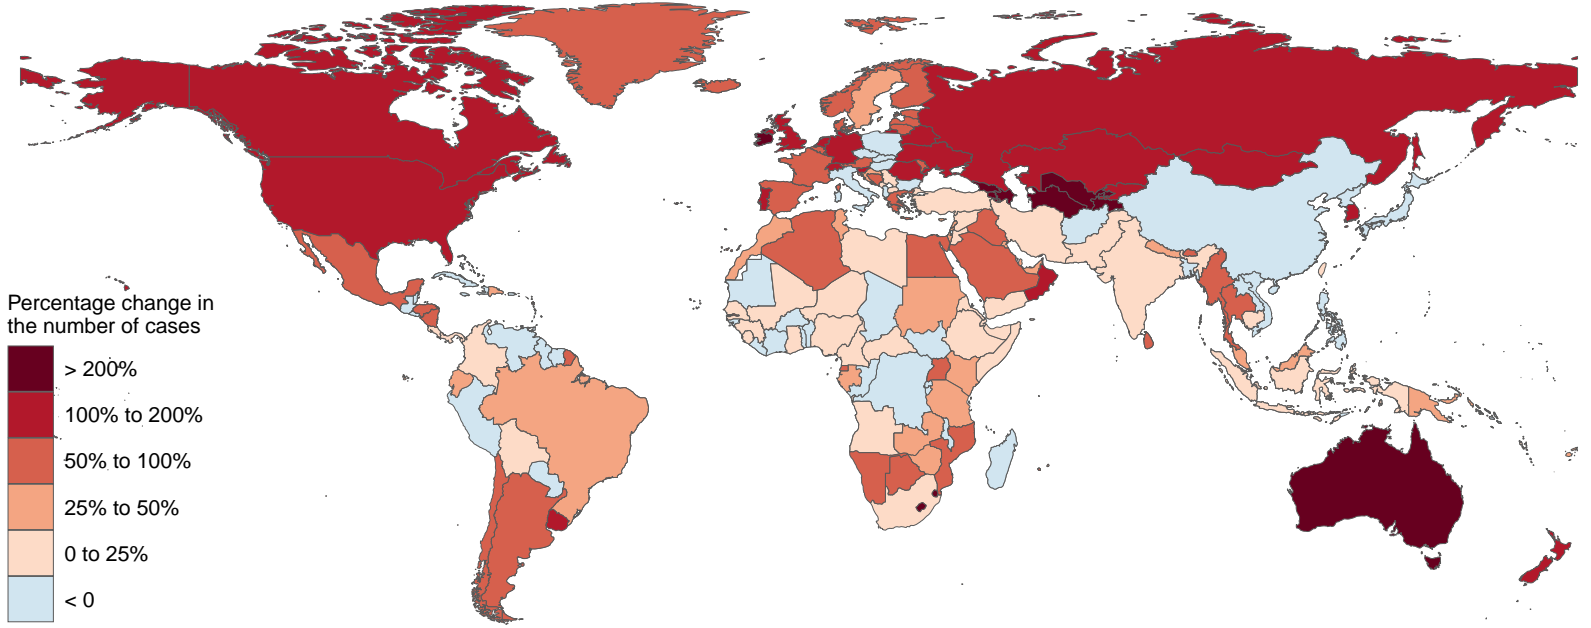

R

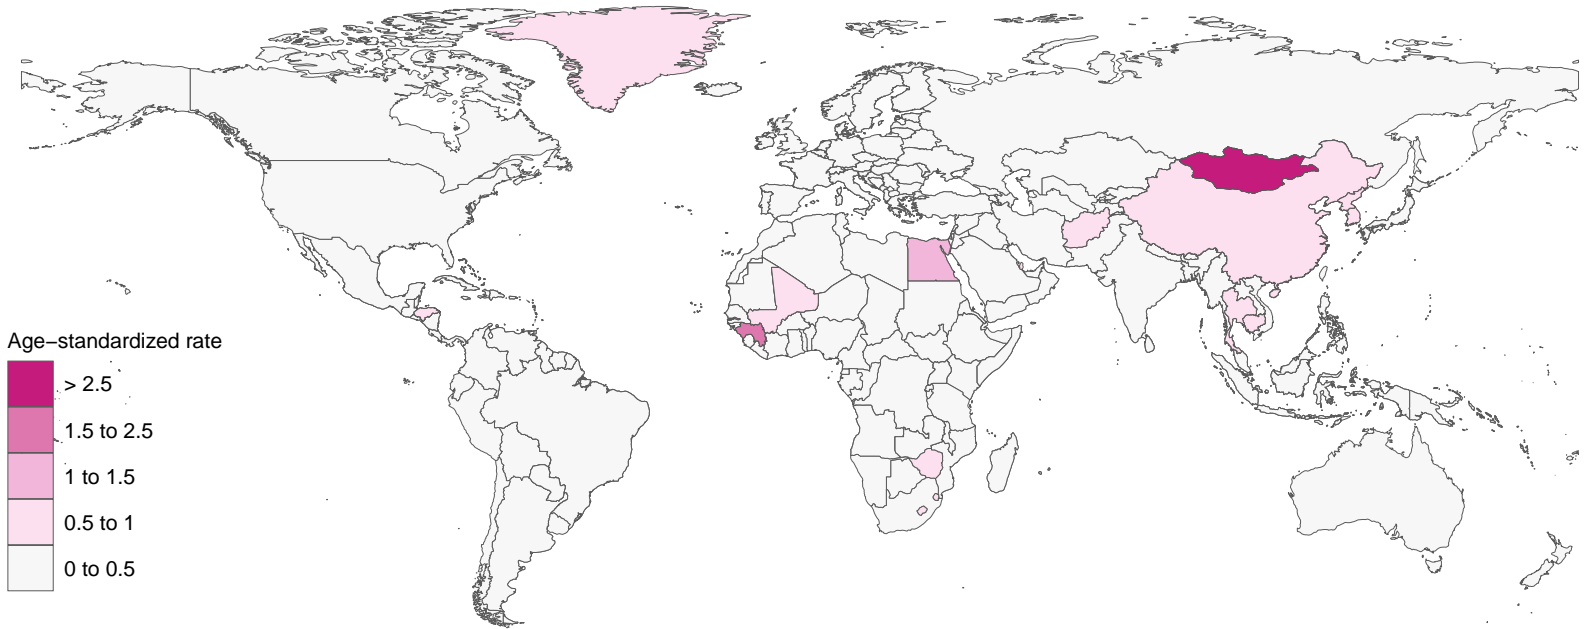

S

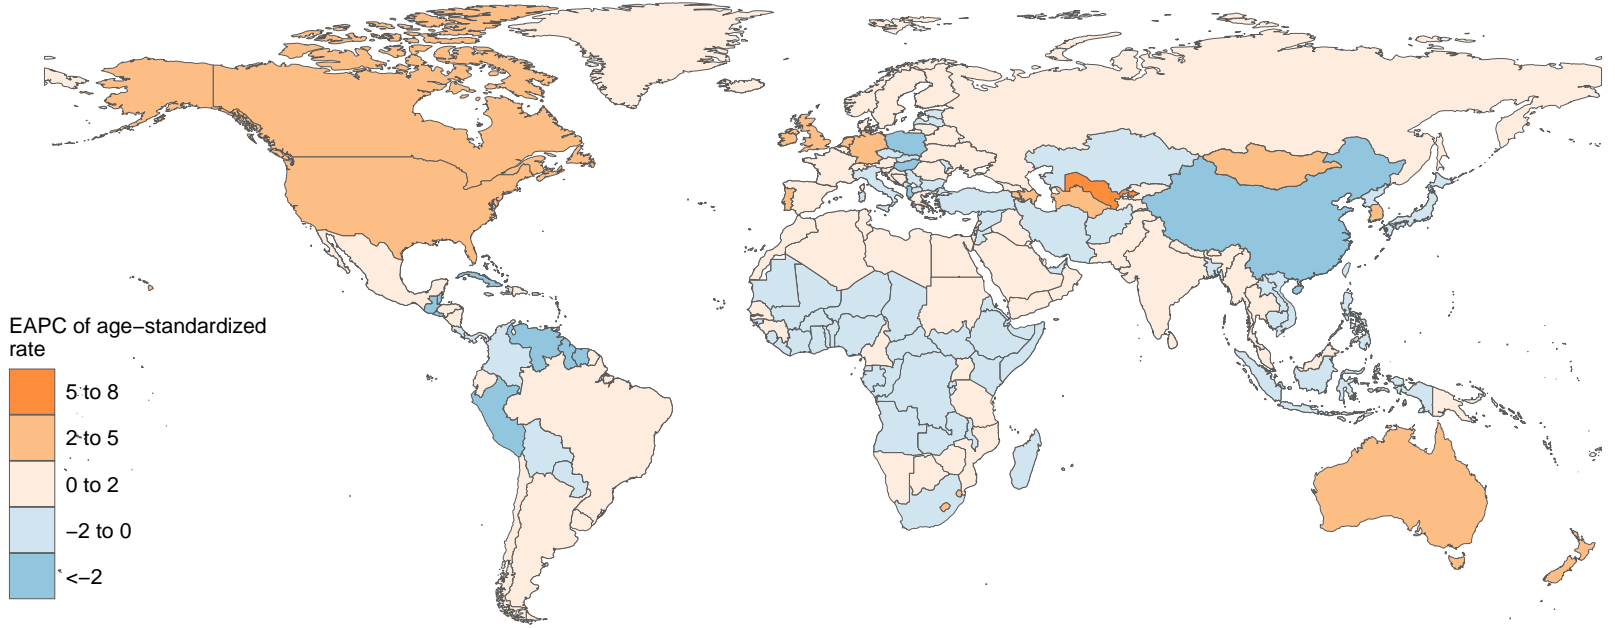

T

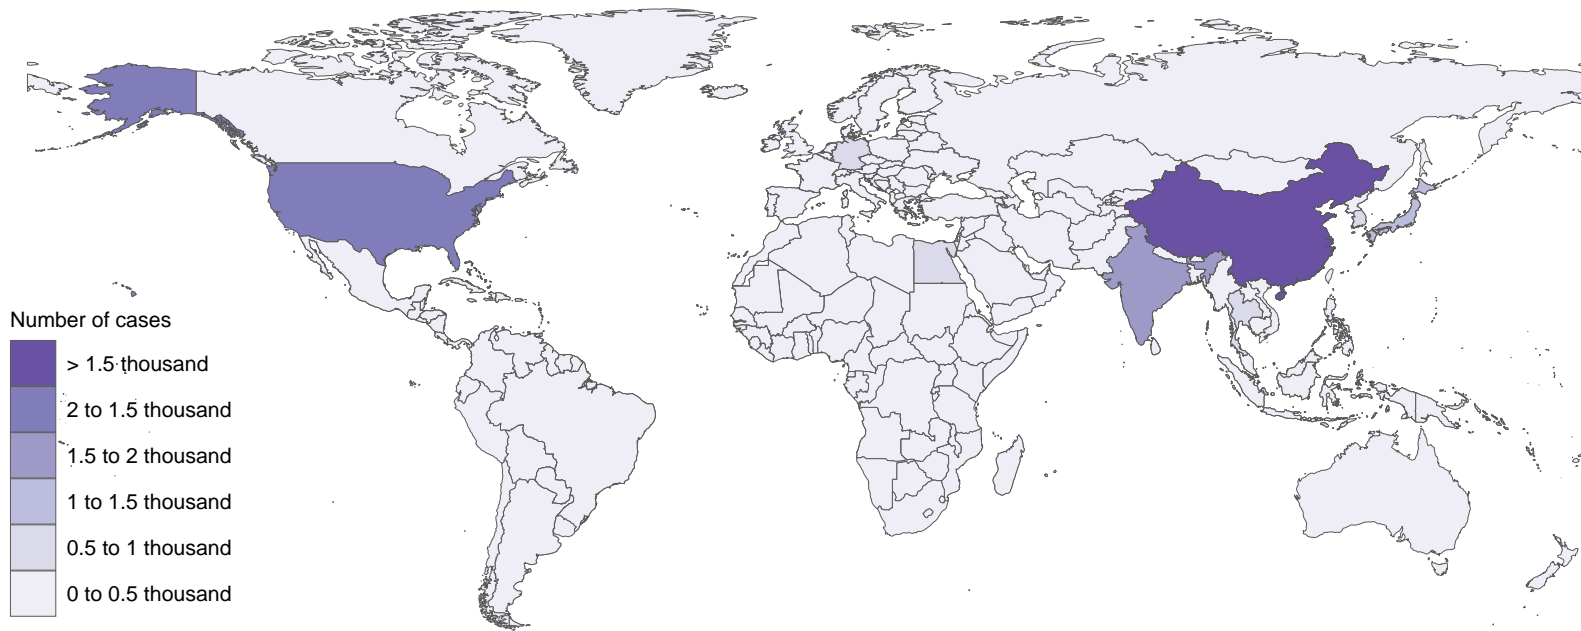

U

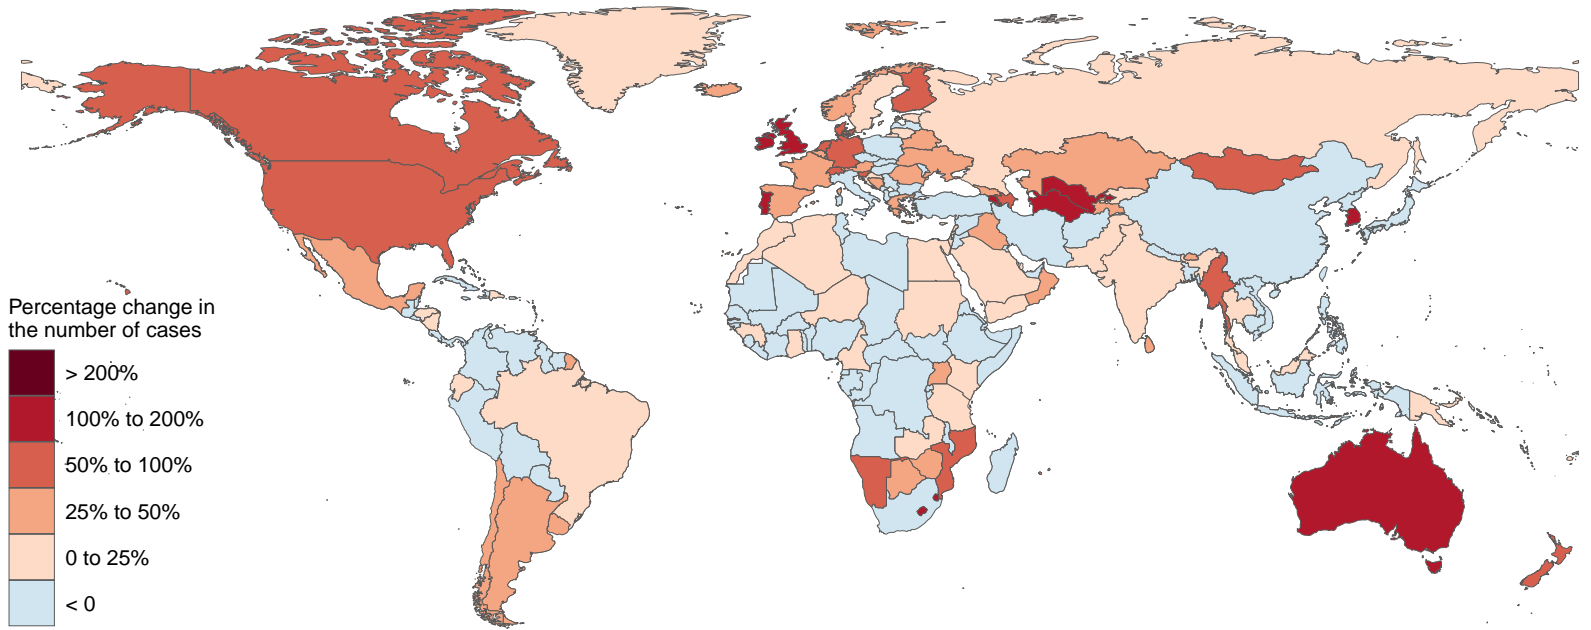

Supplement: CAM4-11-1310-s001.pdf [file CAM4-11-1310-s001.pdf]
