# Supplementary material for: Global burden of primary liver cancer by five etiologies and global prediction by 2035 based on global burden of disease study 2019
Source: PubMed Central journal article supplement (PMC8894698; doi:10.1002/cam4.4551), 2022-02-04

A

(Female) Incidence rate (Male)

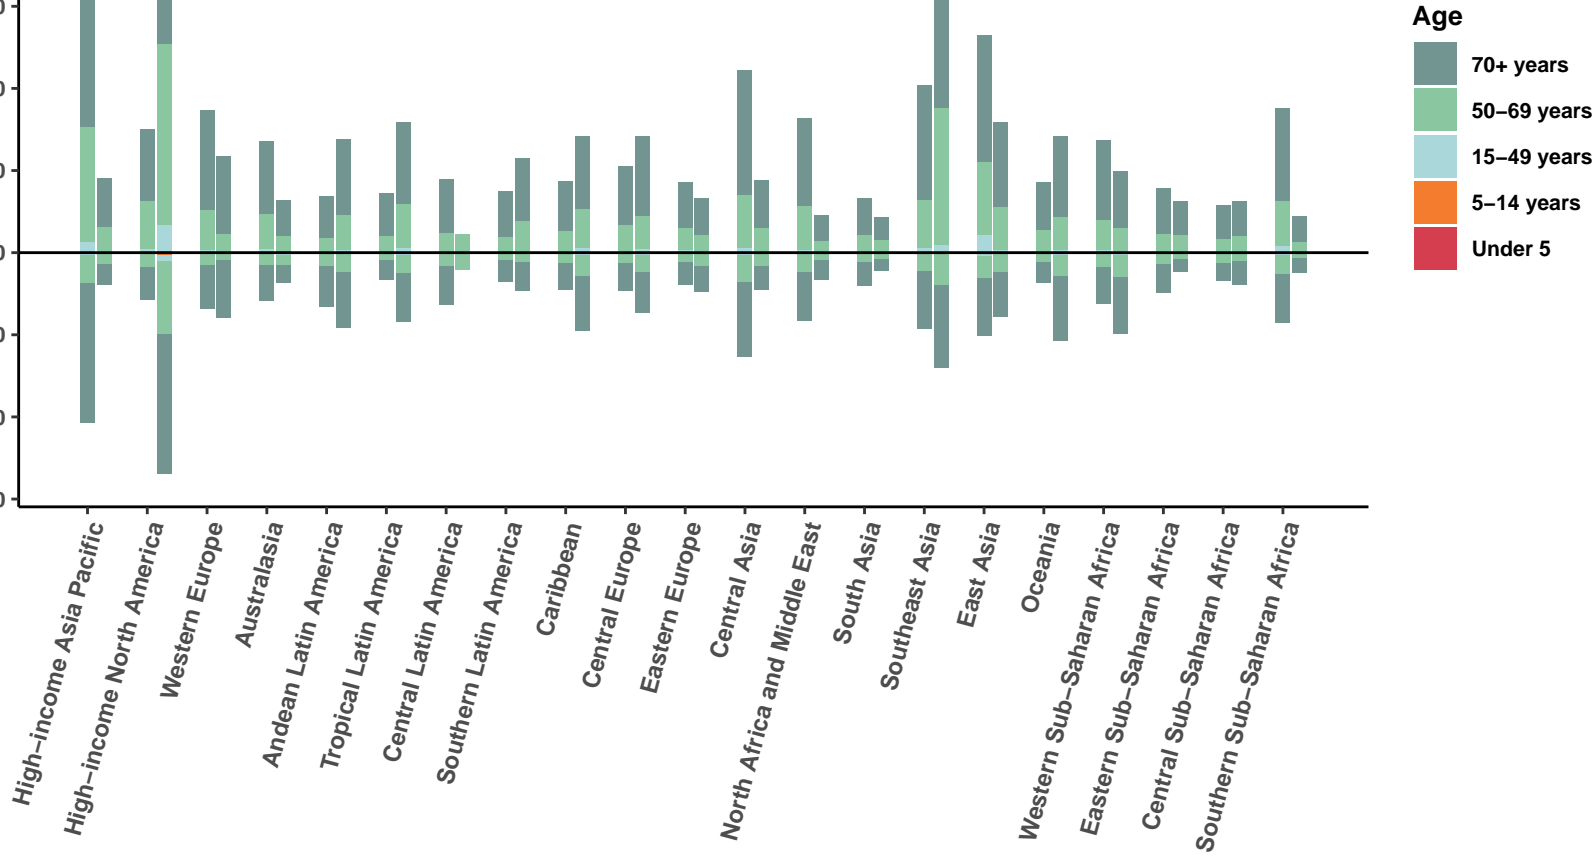

B

## Global number of incident cases and incidence rate by age and sex, 2019

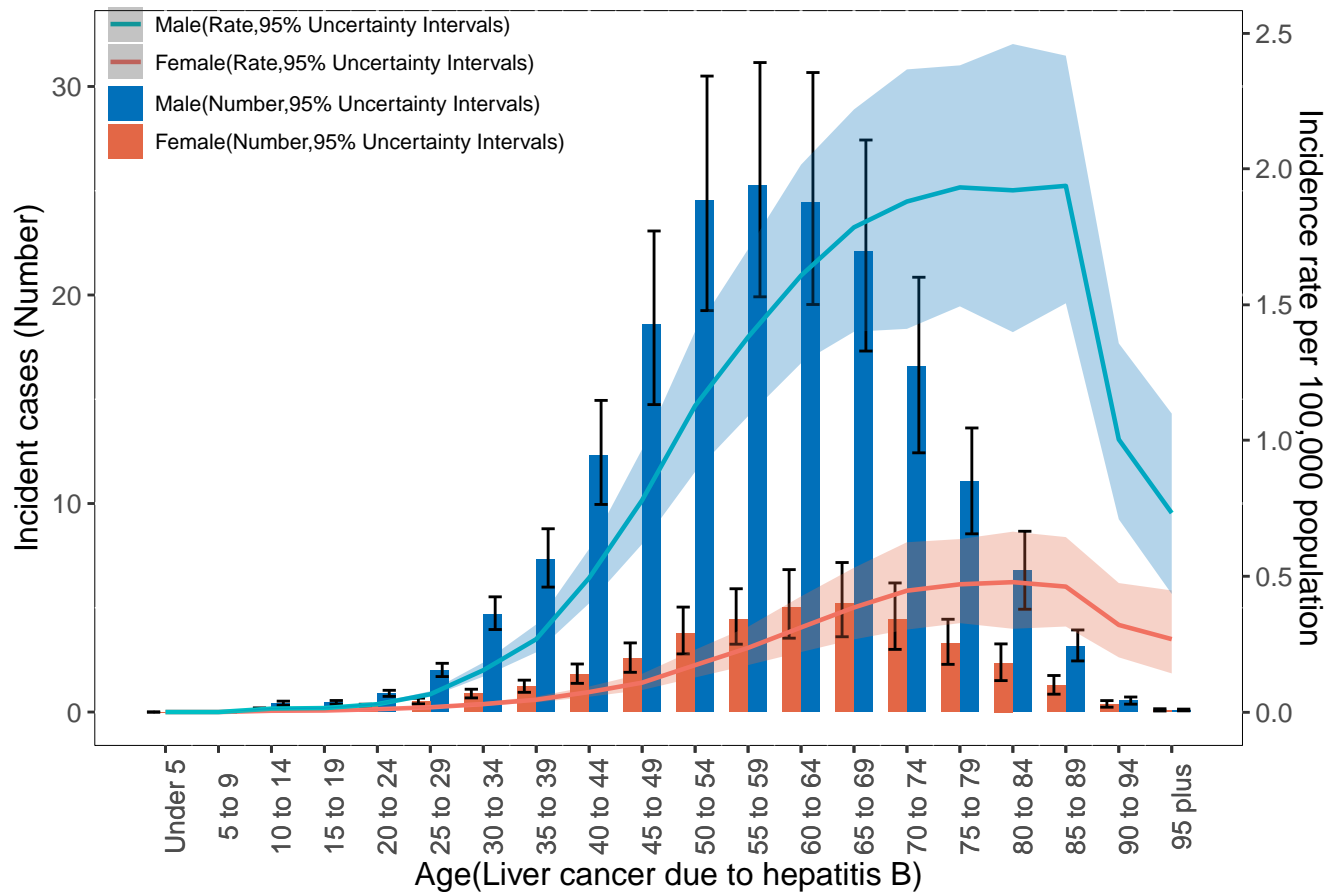

# Global number of incident cases and incidence rate by age and sex, 2019

Incident cases (Number)

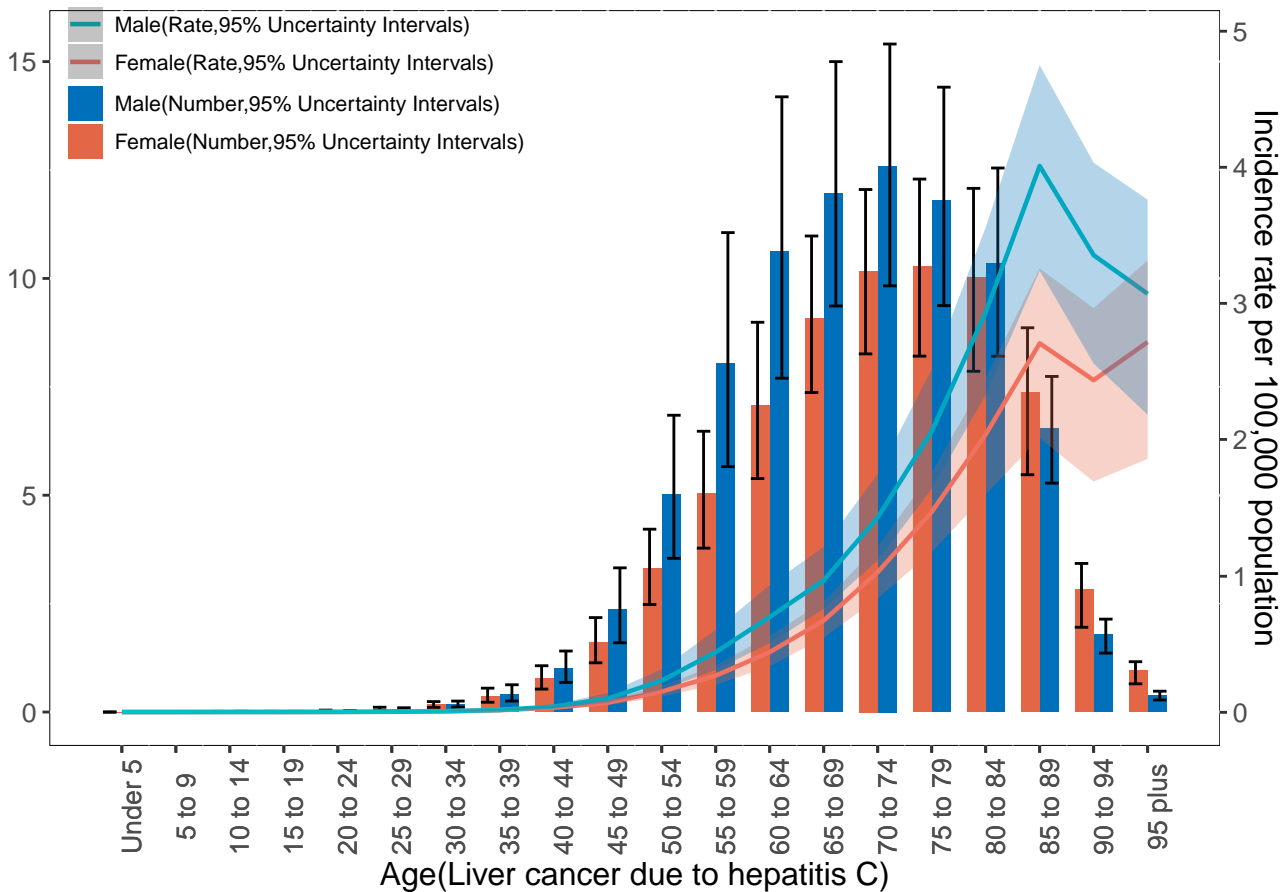

D

## Global number of incident cases and incidence rate by age and sex, 2019

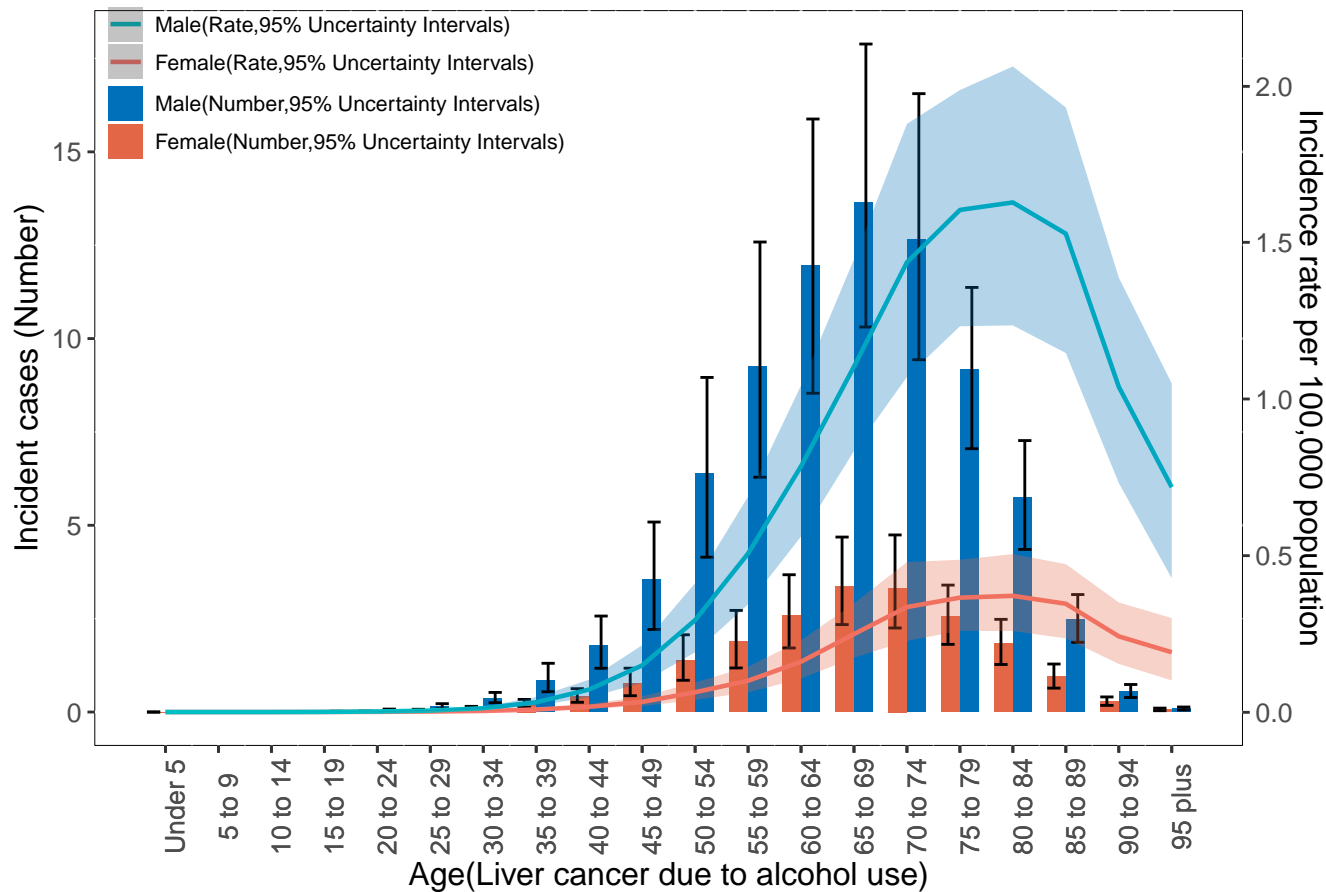

# Global number of incident cases and incidence rate by age and sex, 2019

E

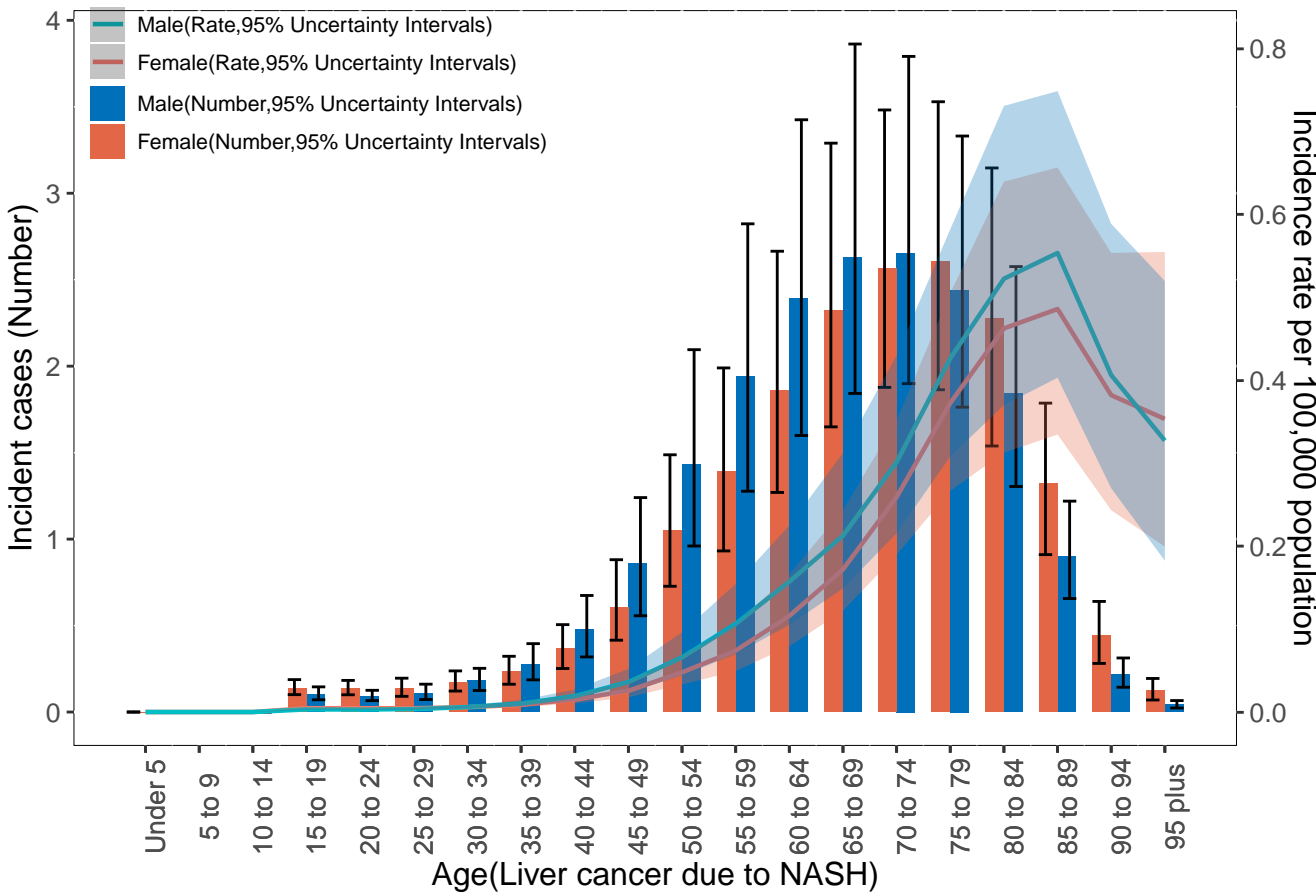

F

## Global number of incident cases and incidence rate by age and sex, 2019

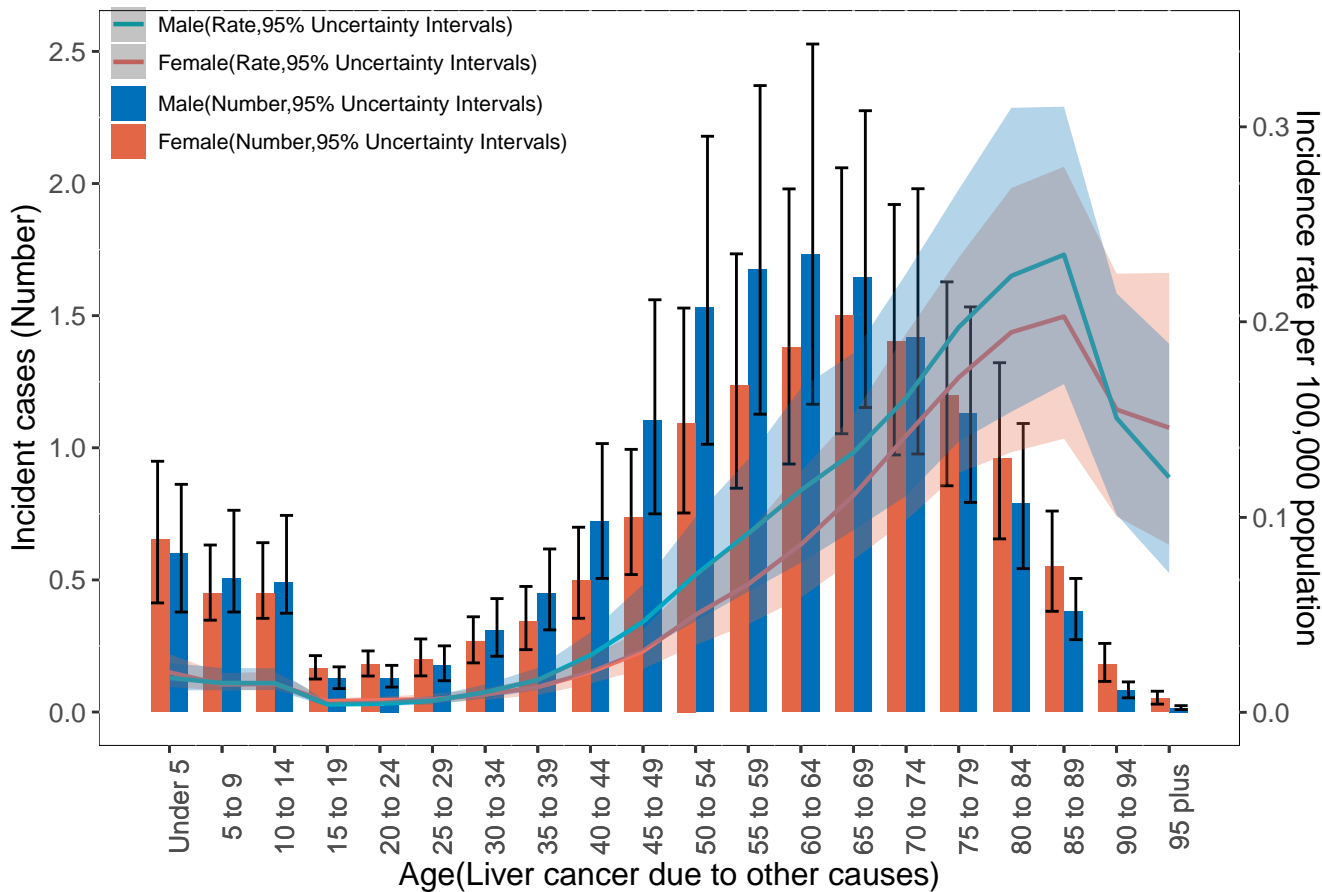

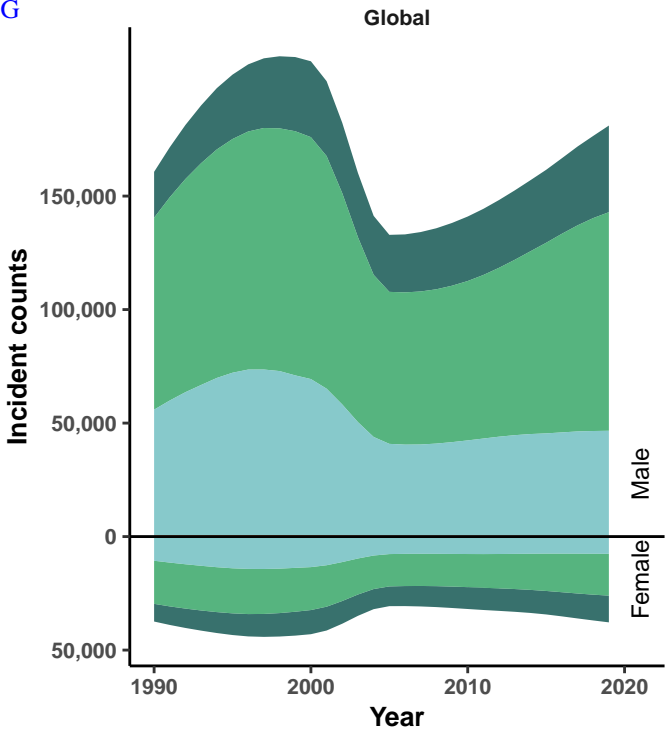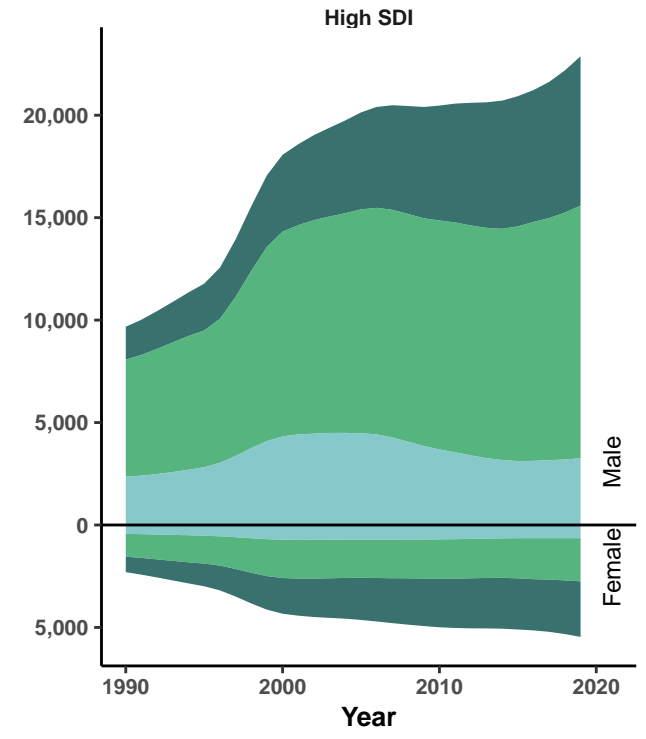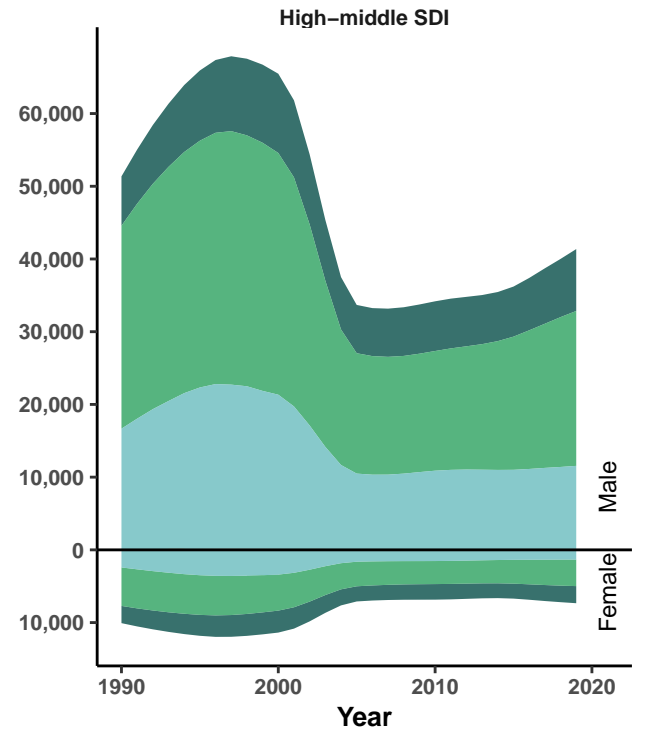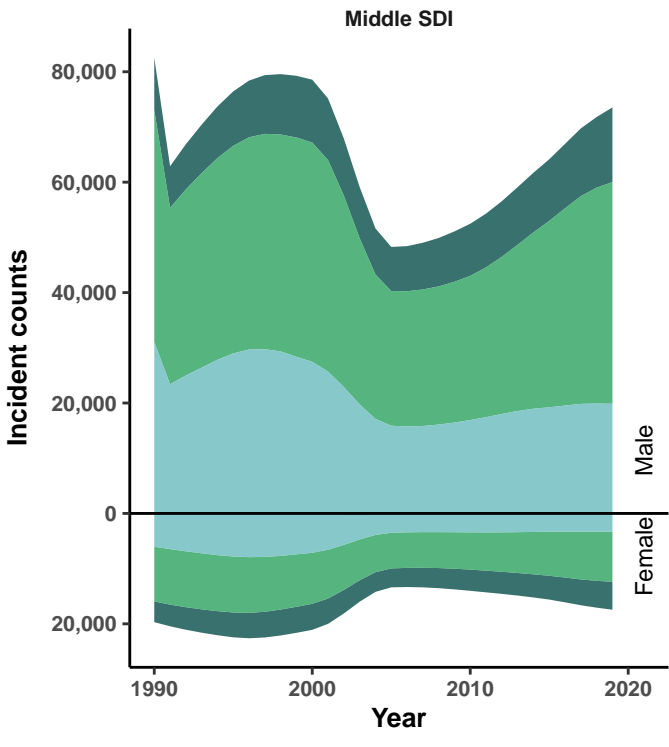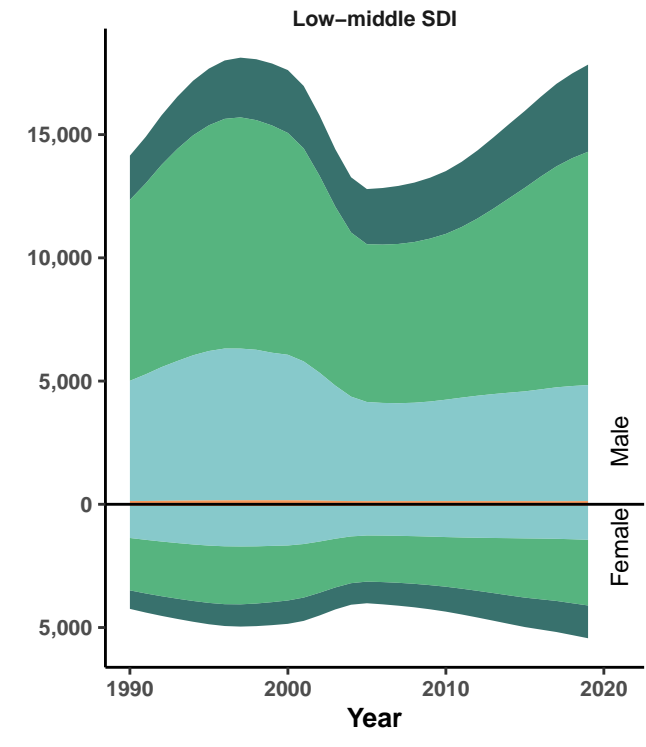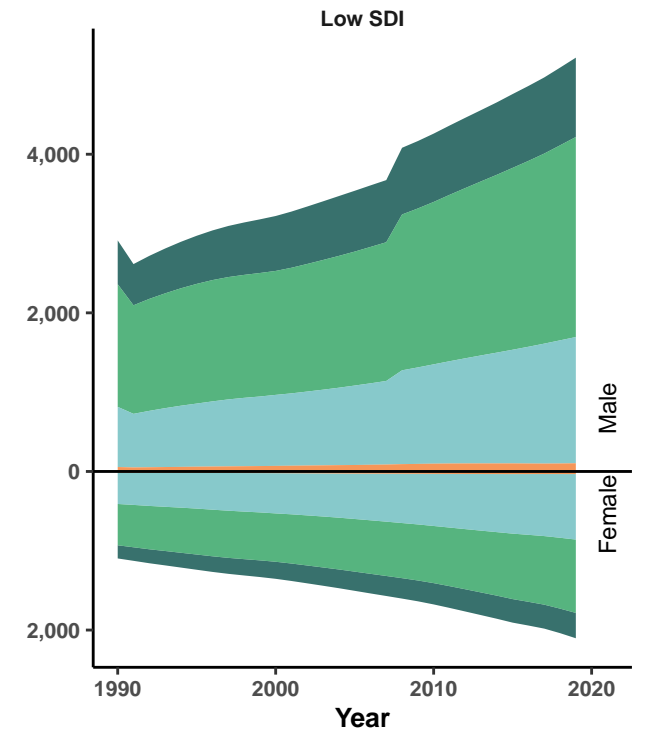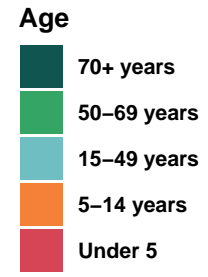

H

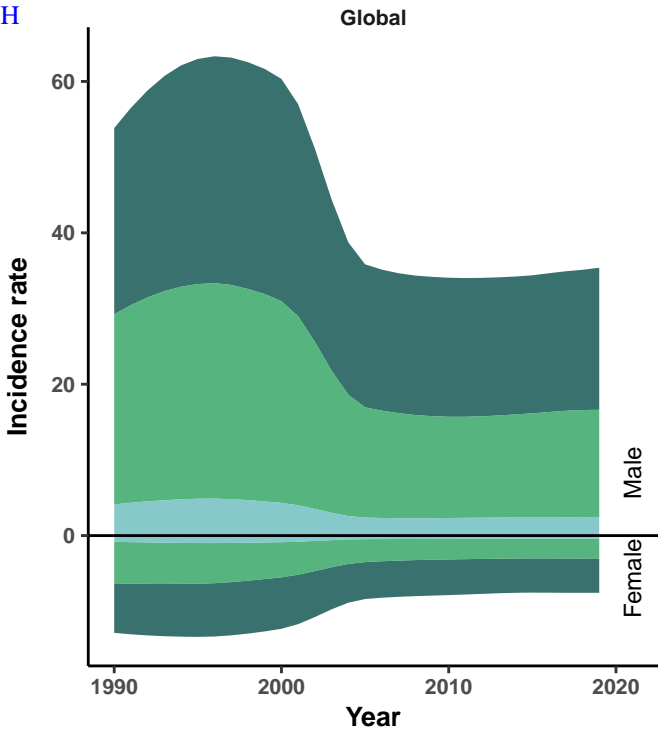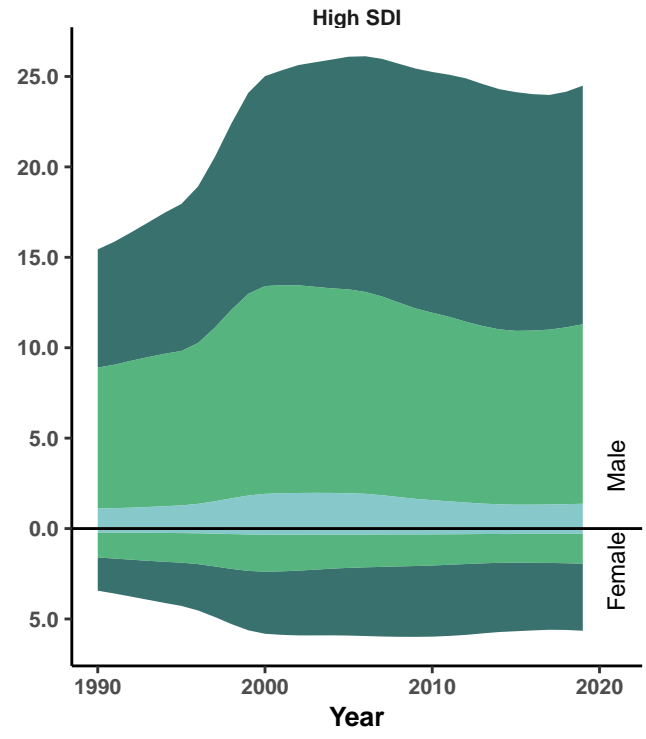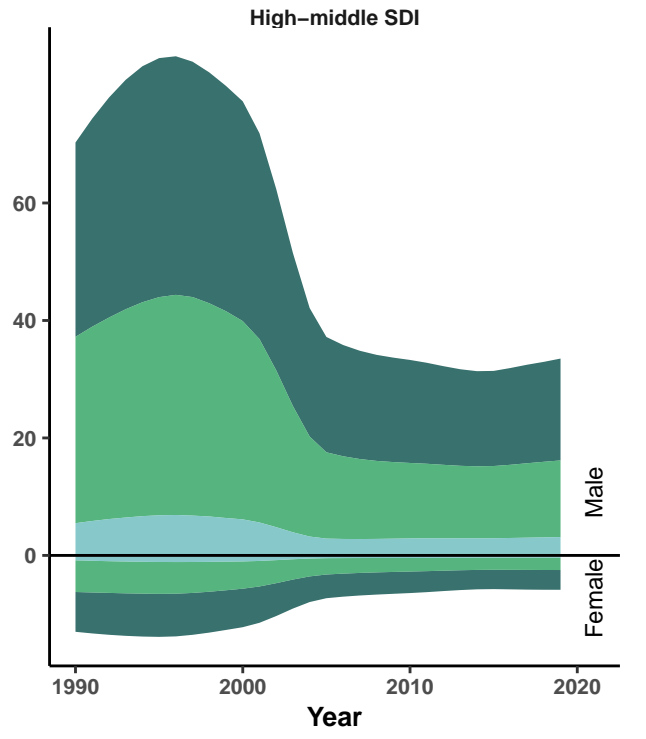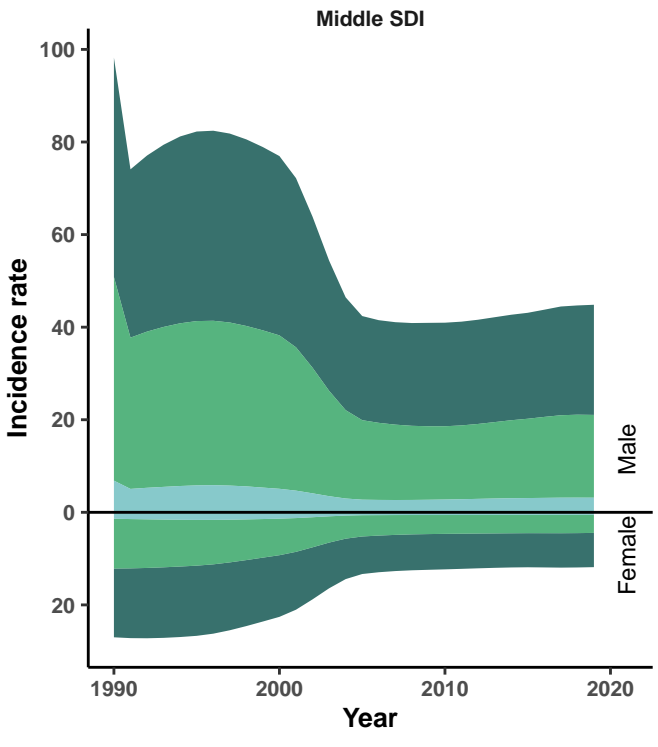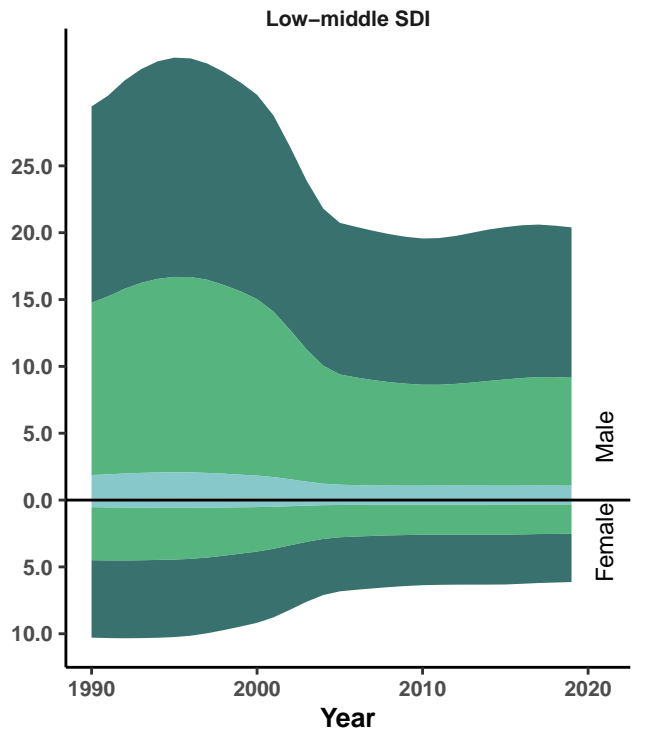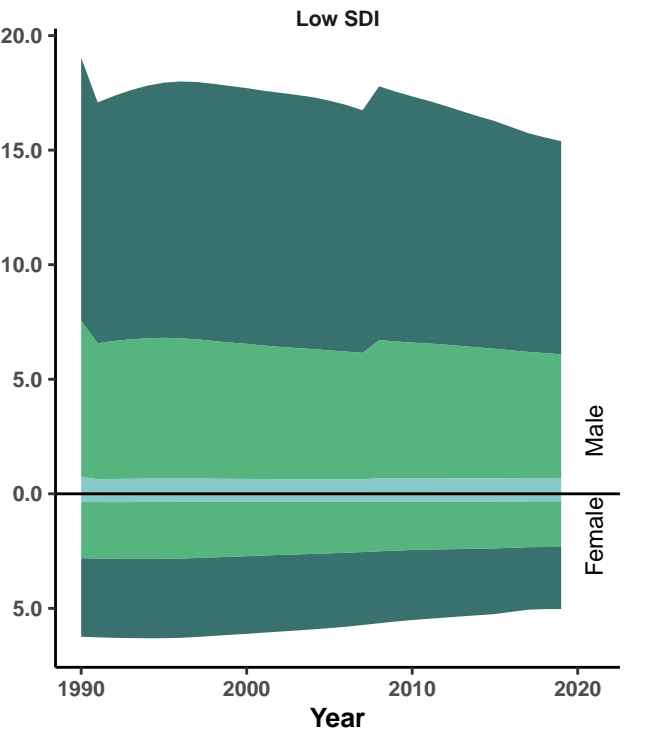



**I****Global**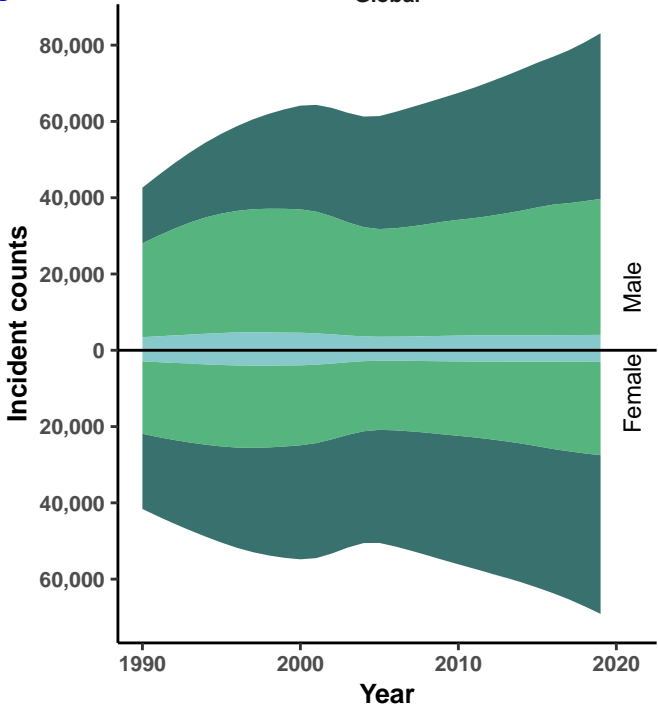**High SDI**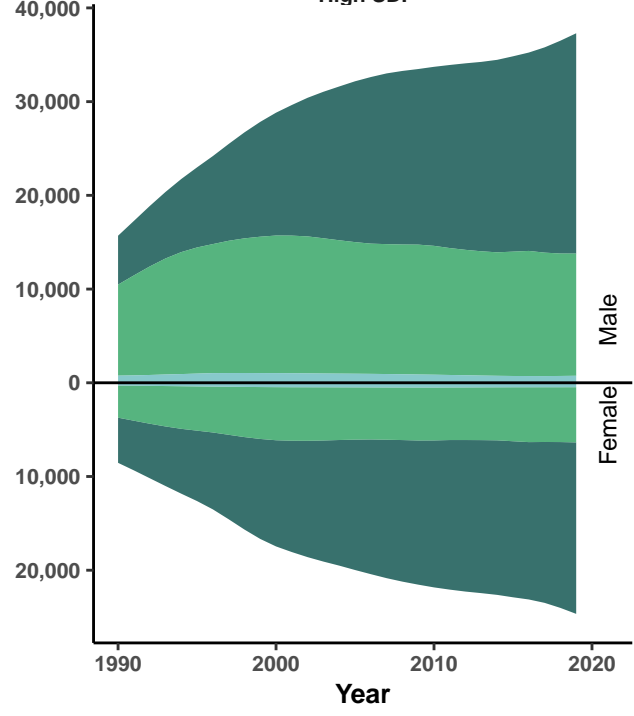**High-middle SDI**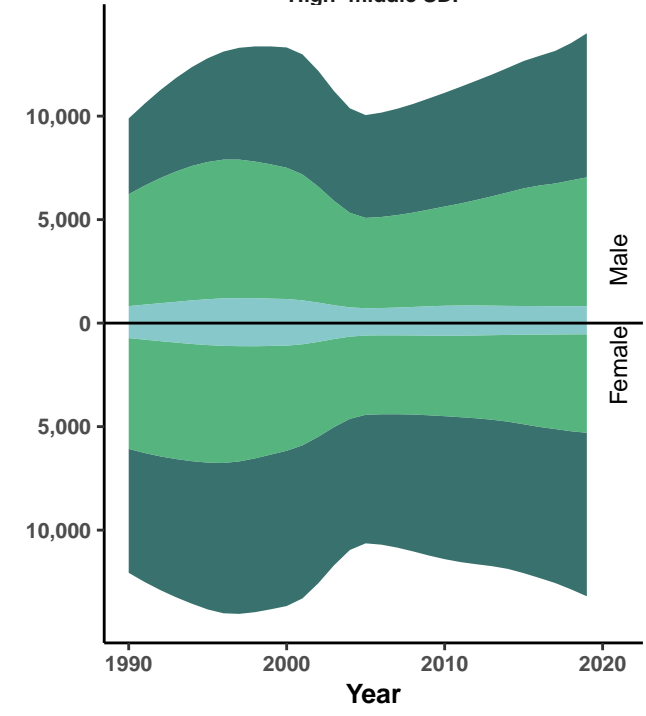**Middle SDI**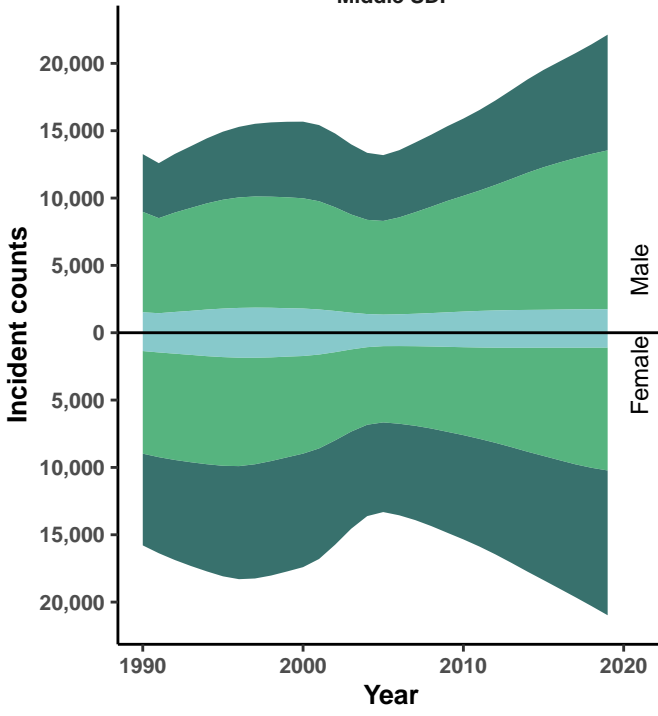**Low-middle SDI**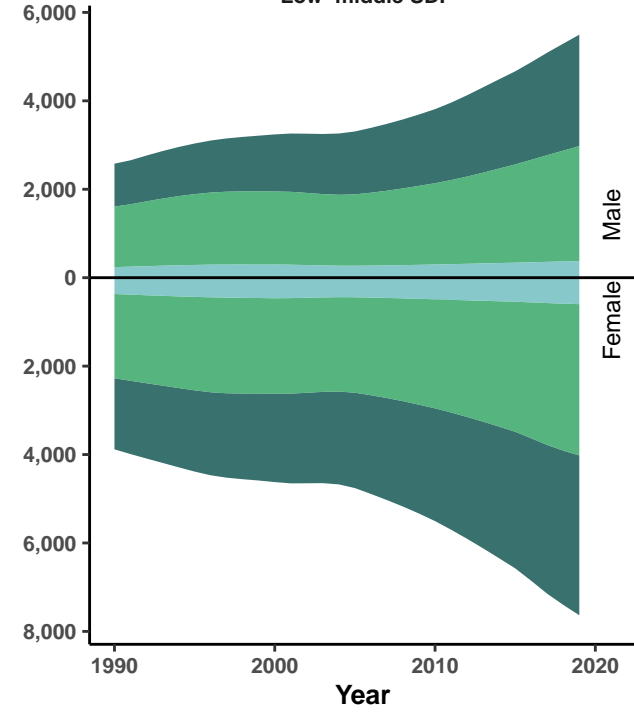**Low SDI**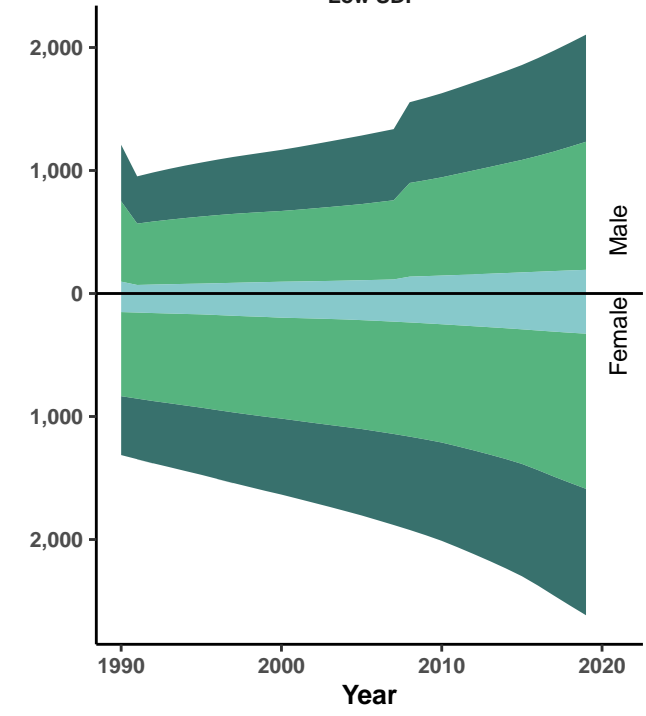**Age**

- 70+ years
- 50-69 years
- 15-49 years
- 5-14 years
- Under 5

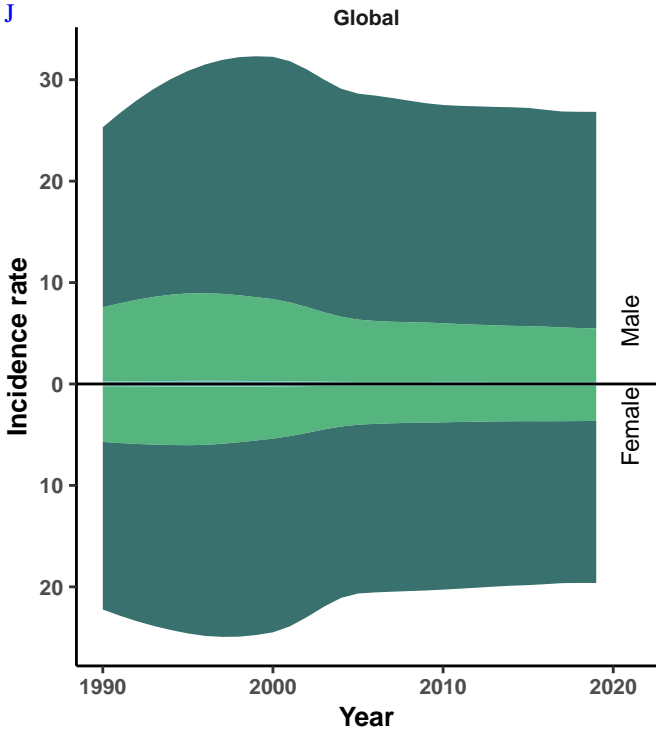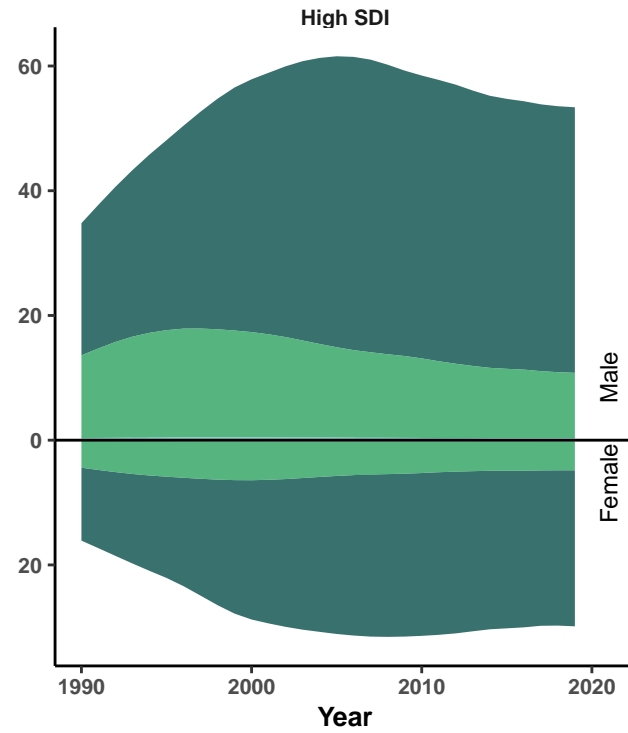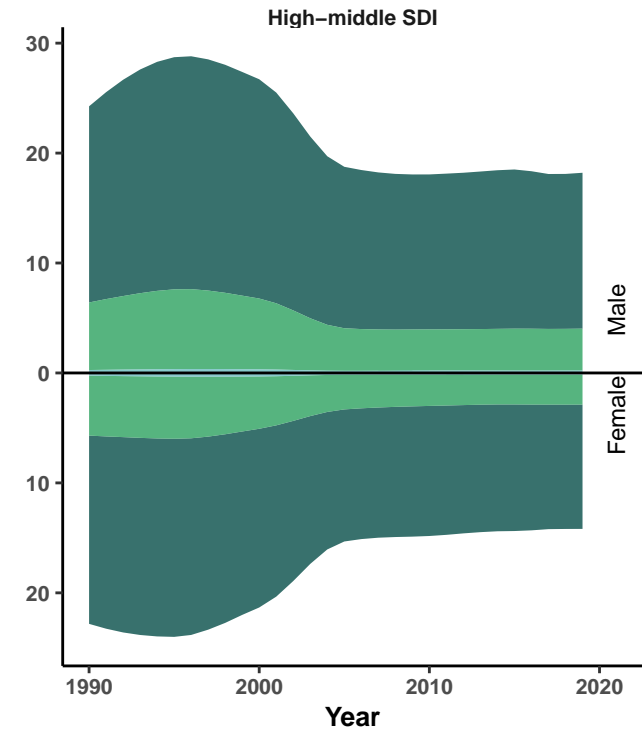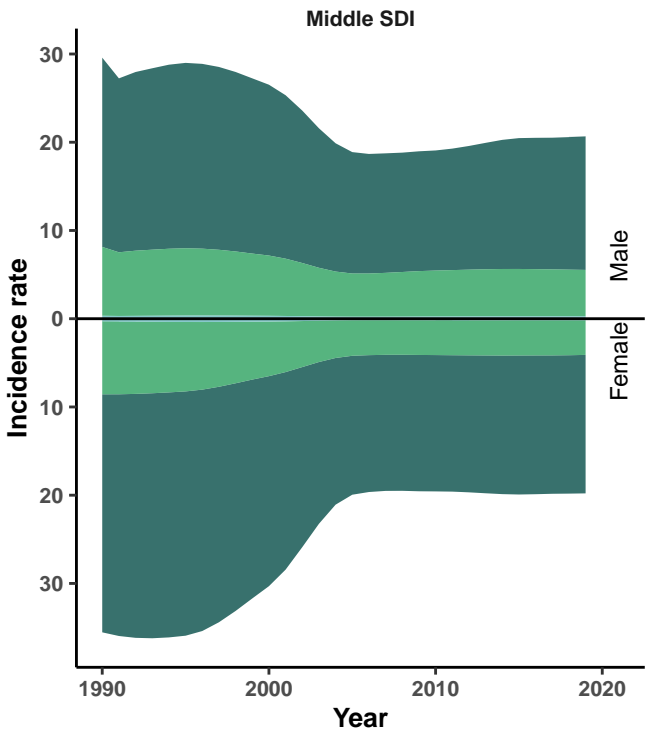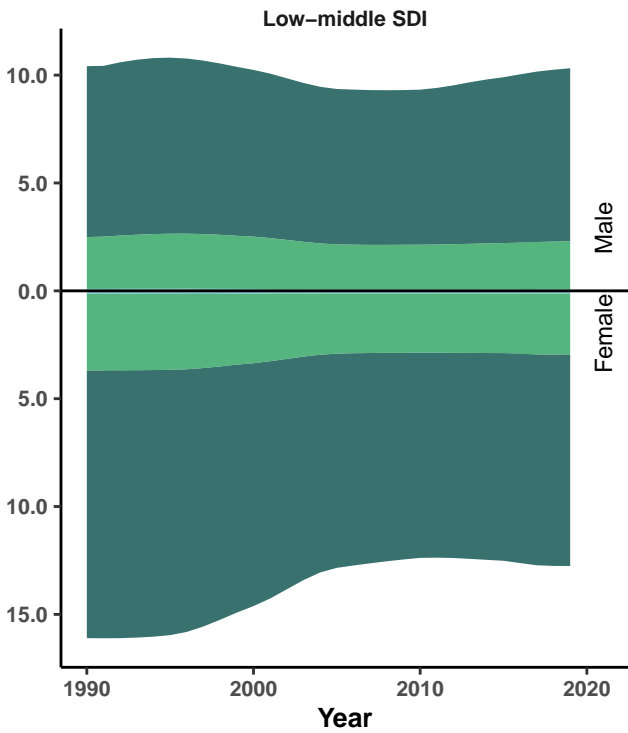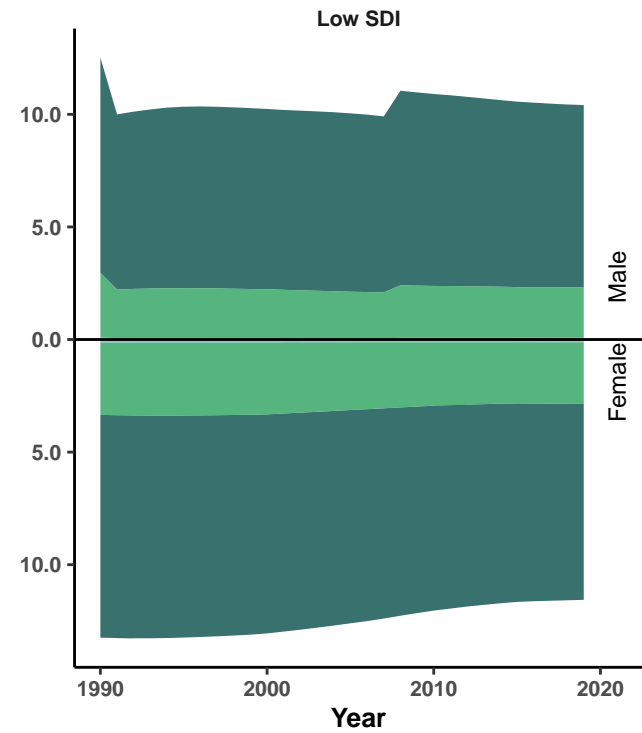

K

Global

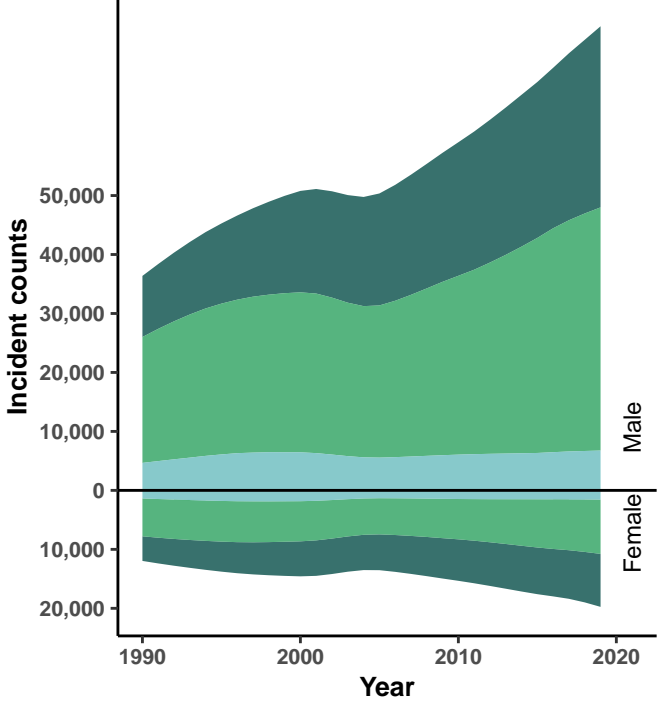

High SDI

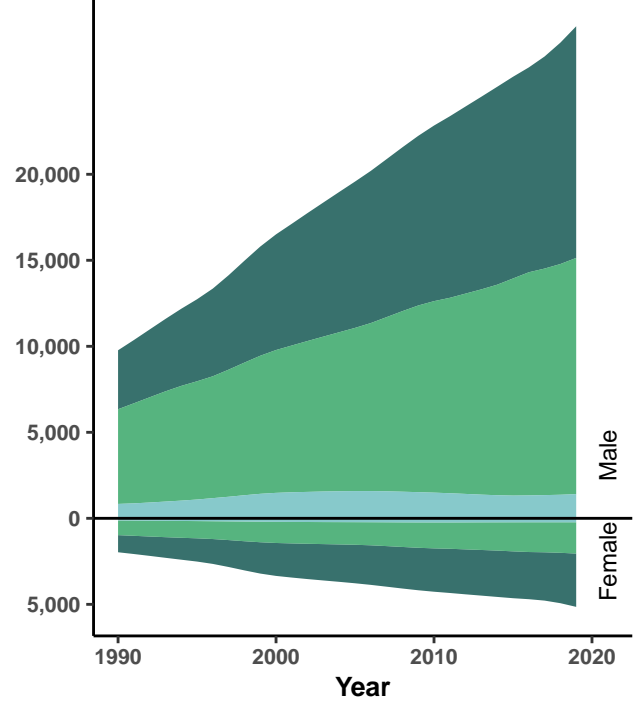

High-middle SDI

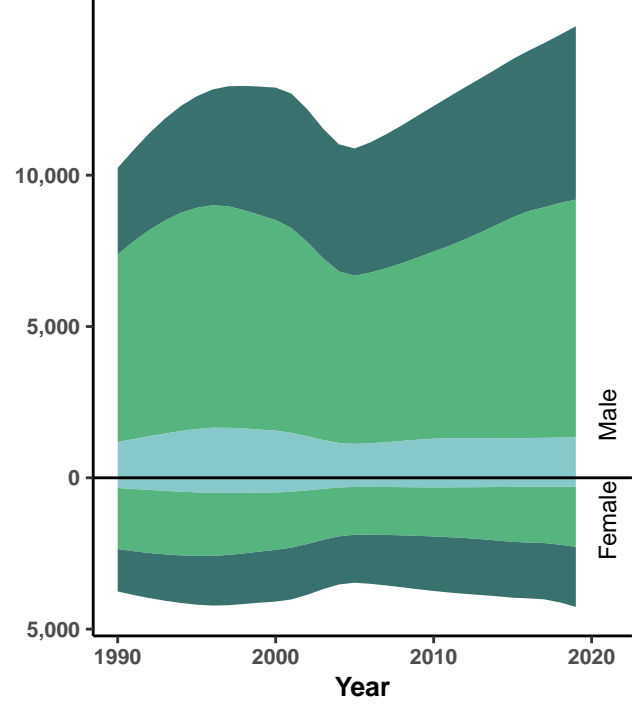

Middle SDI

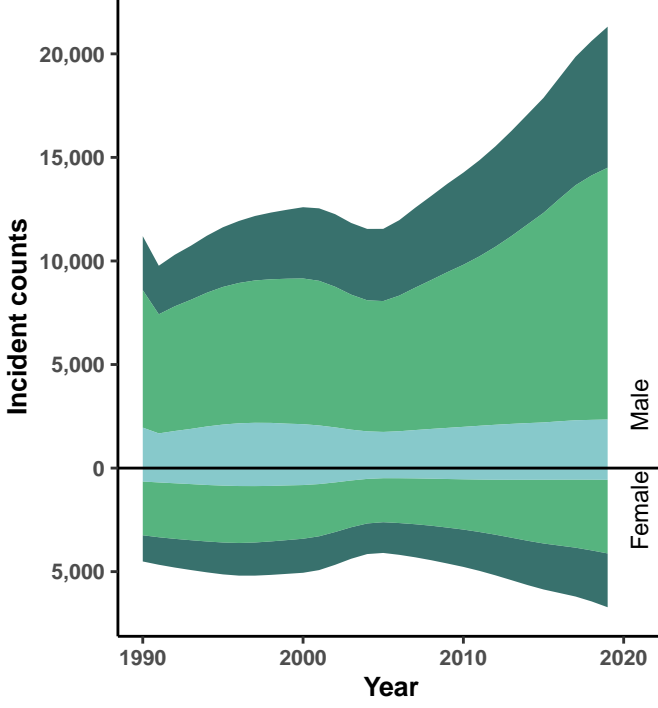

Low-middle SDI

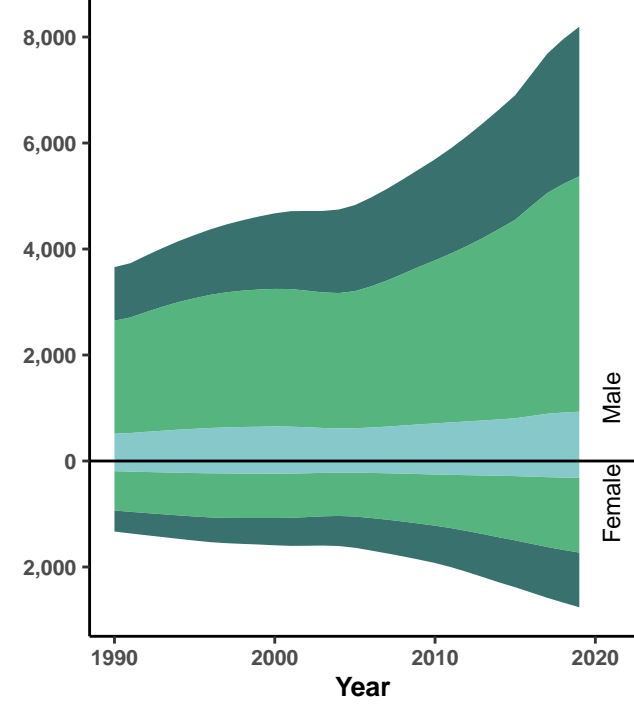

Low SDI

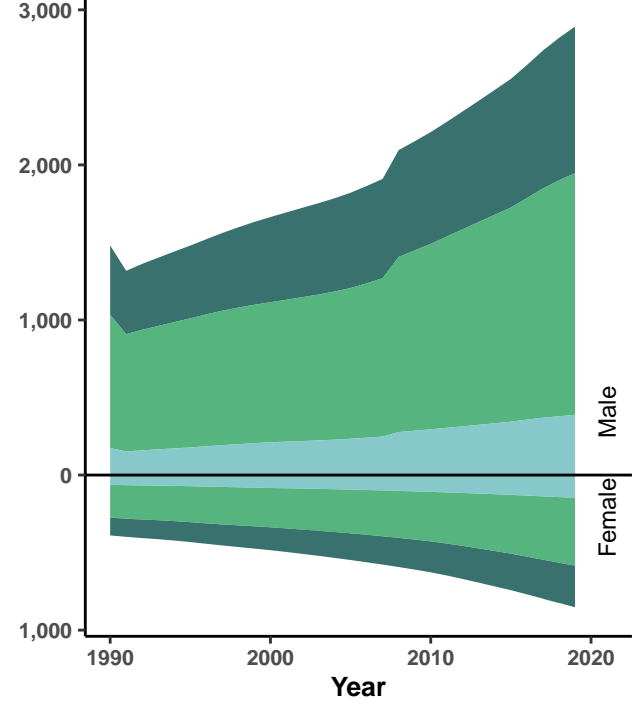

Age

- 70+ years
- 50-69 years
- 15-49 years
- 5-14 years
- Under 5

Global

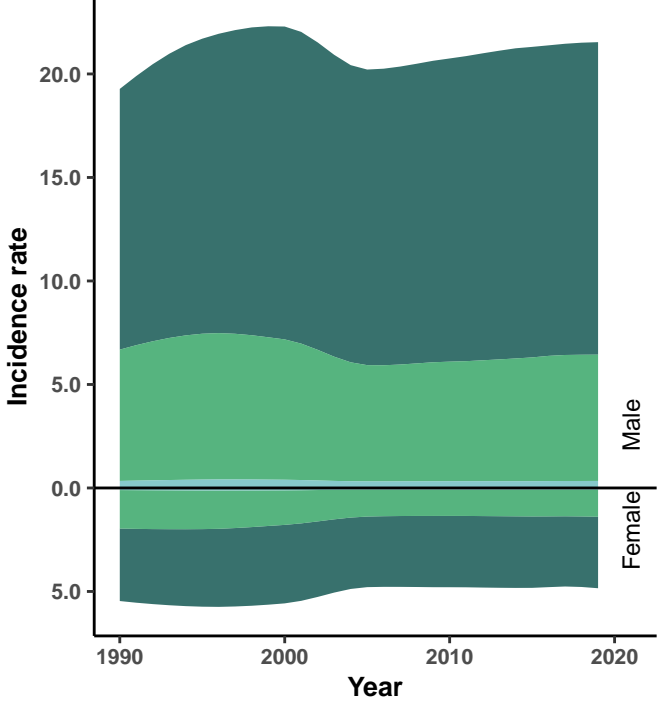

High SDI

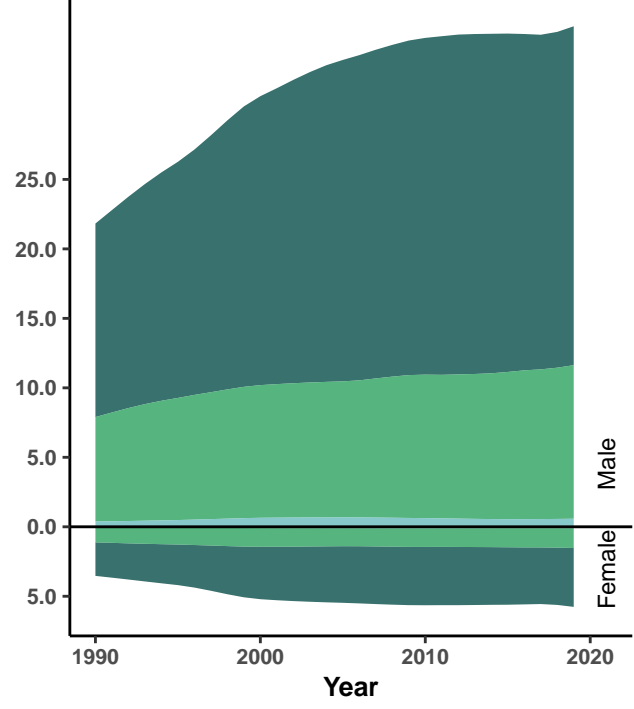

High-middle SDI

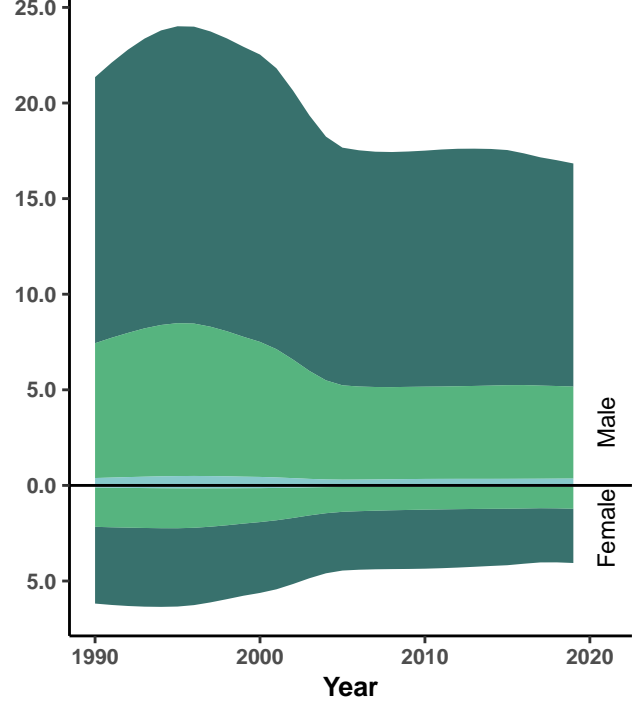

Middle SDI

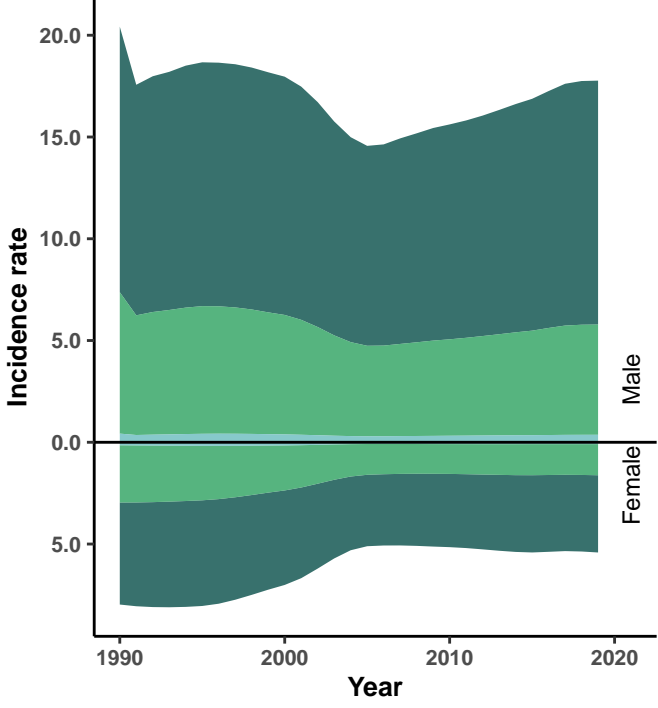

Low-middle SDI

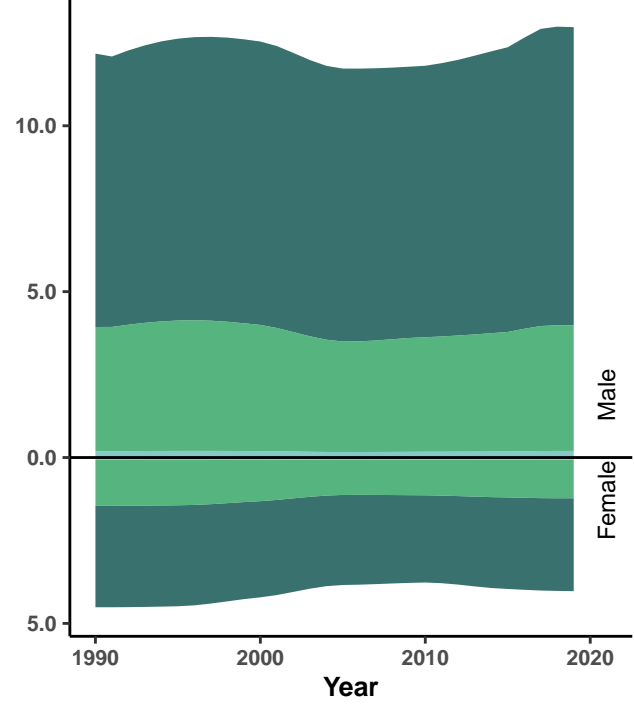

Low SDI

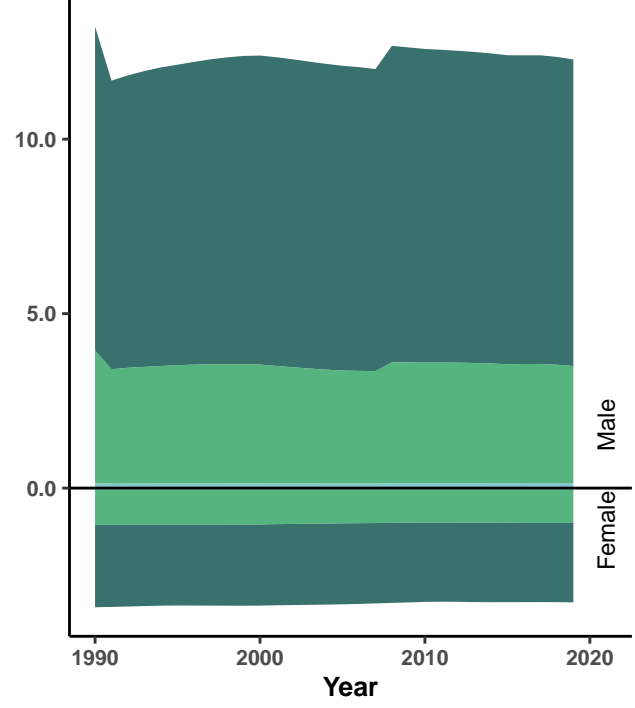

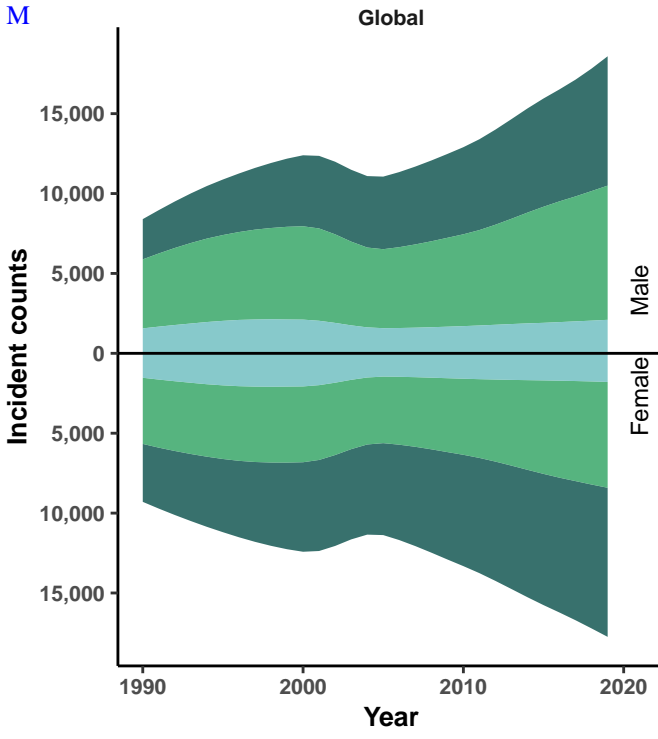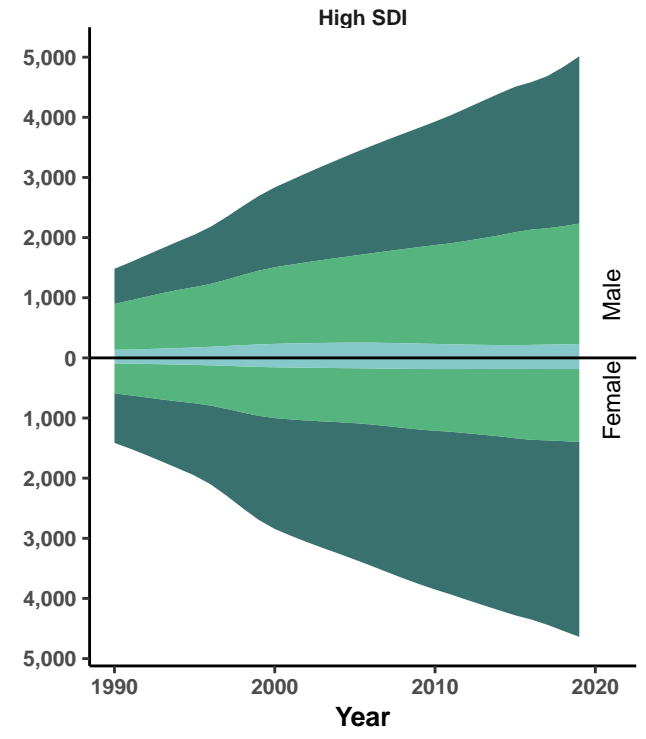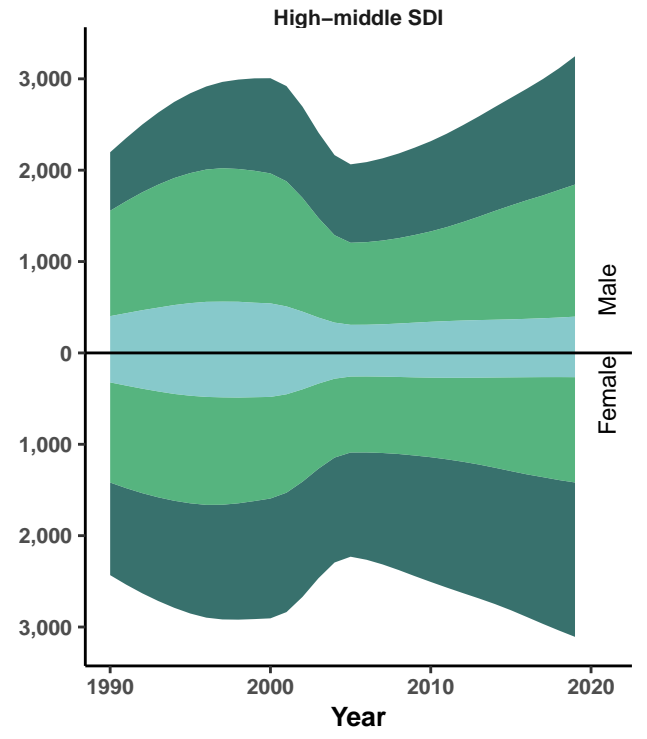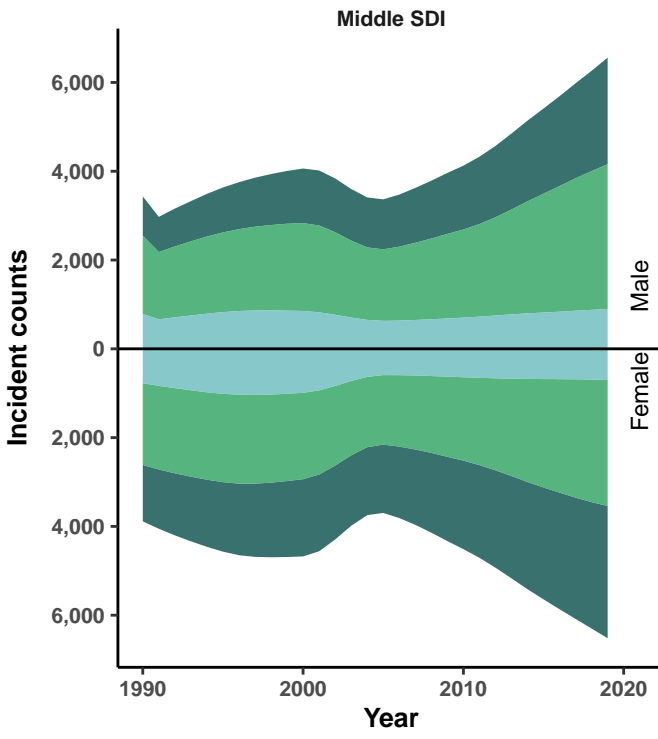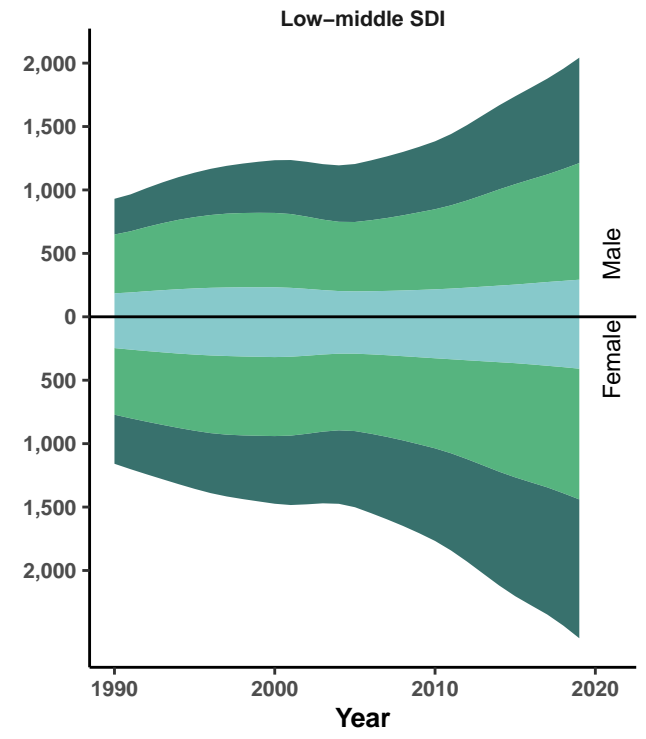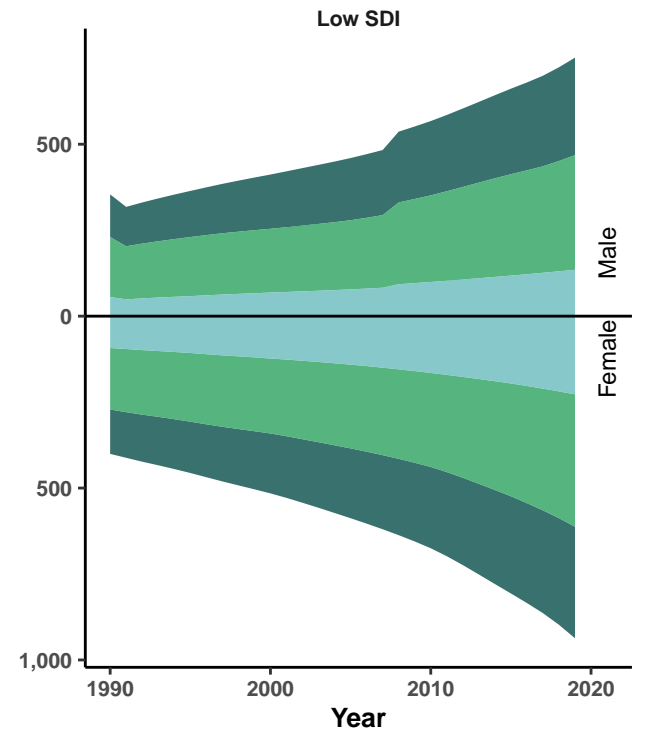

N

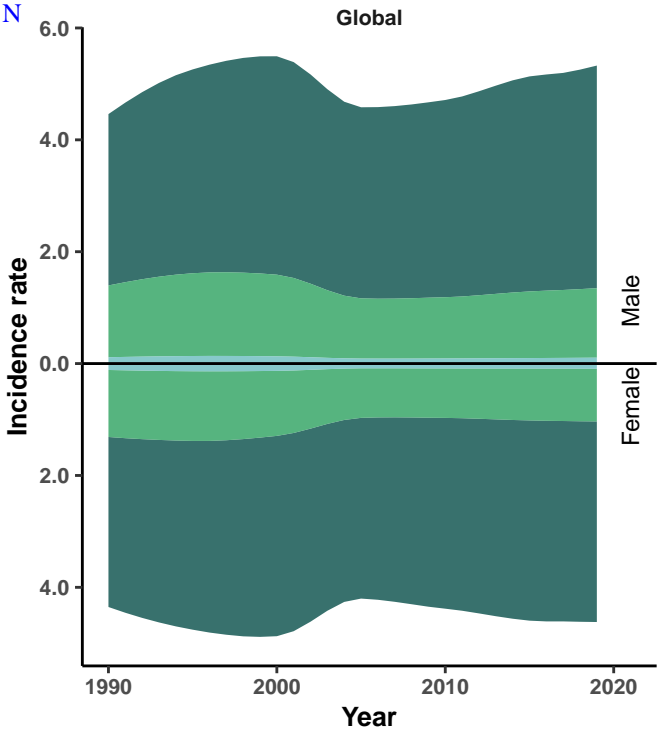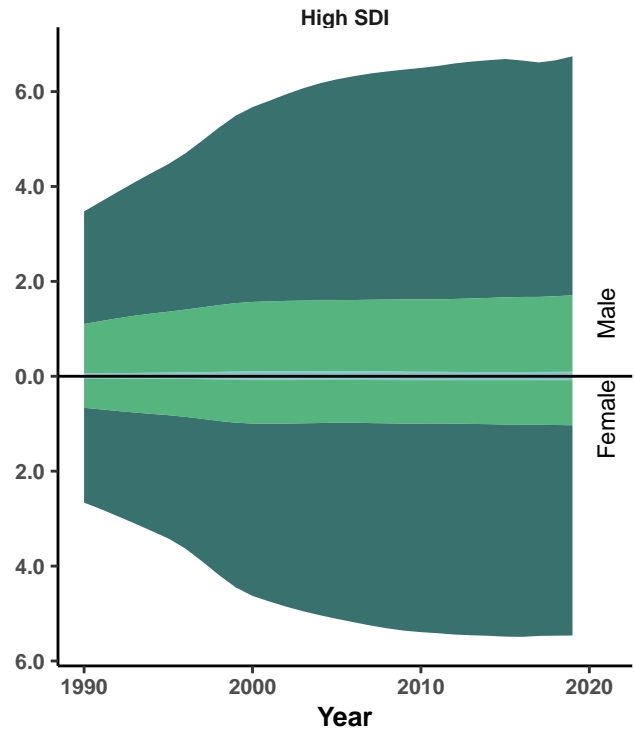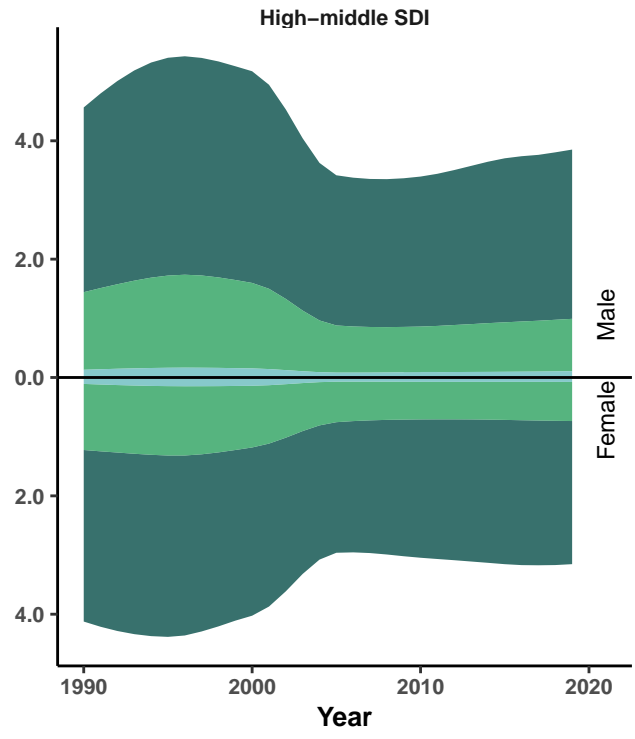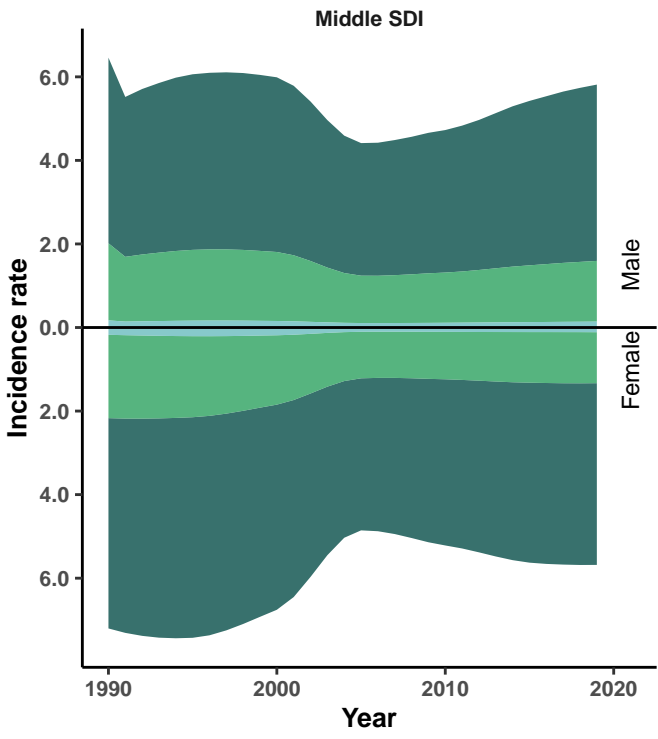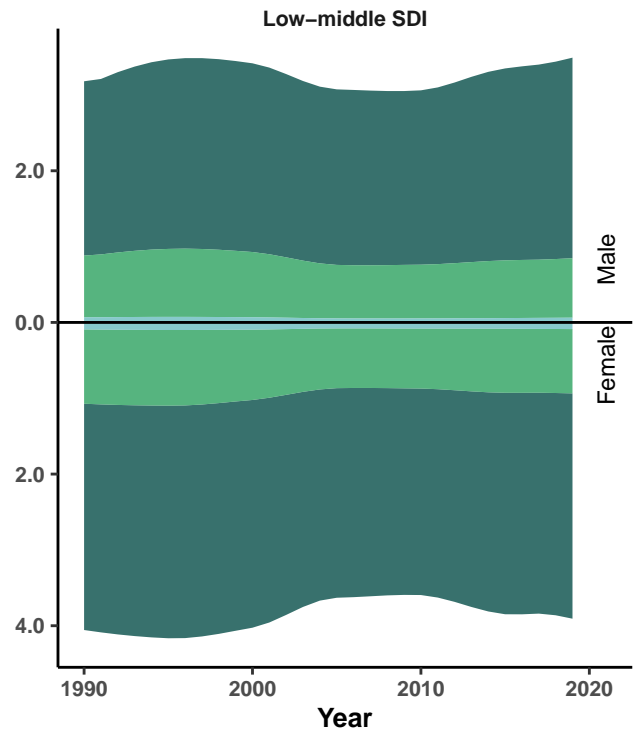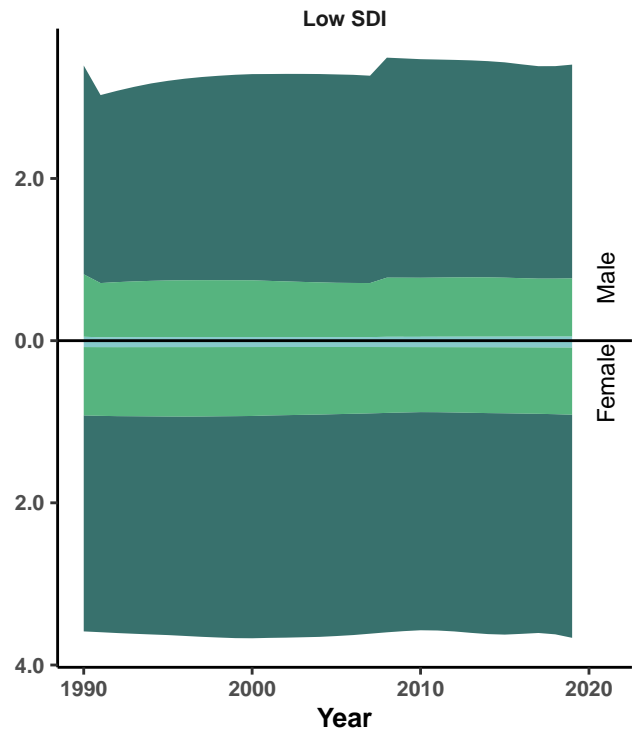

O

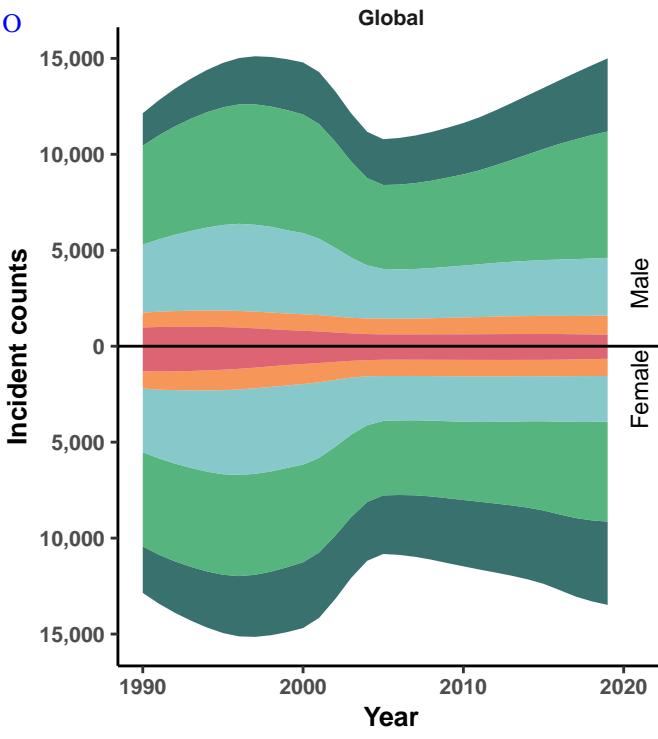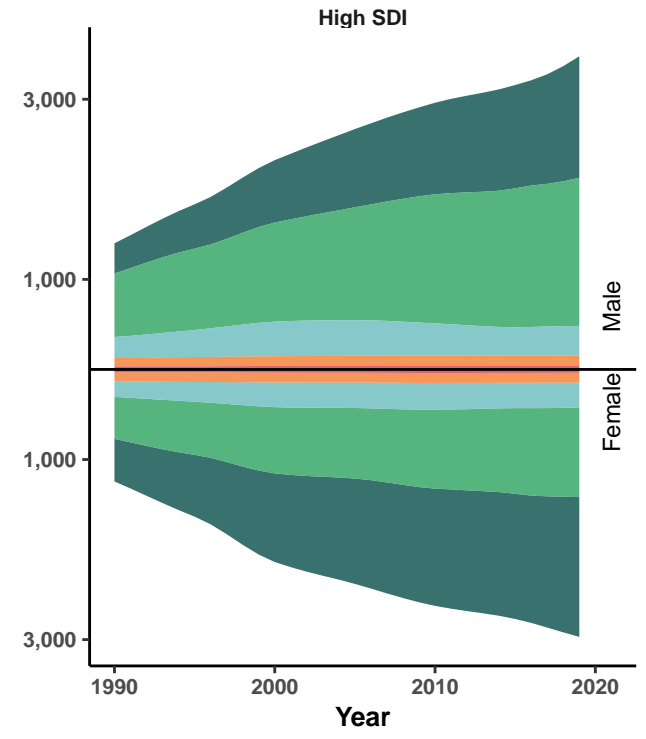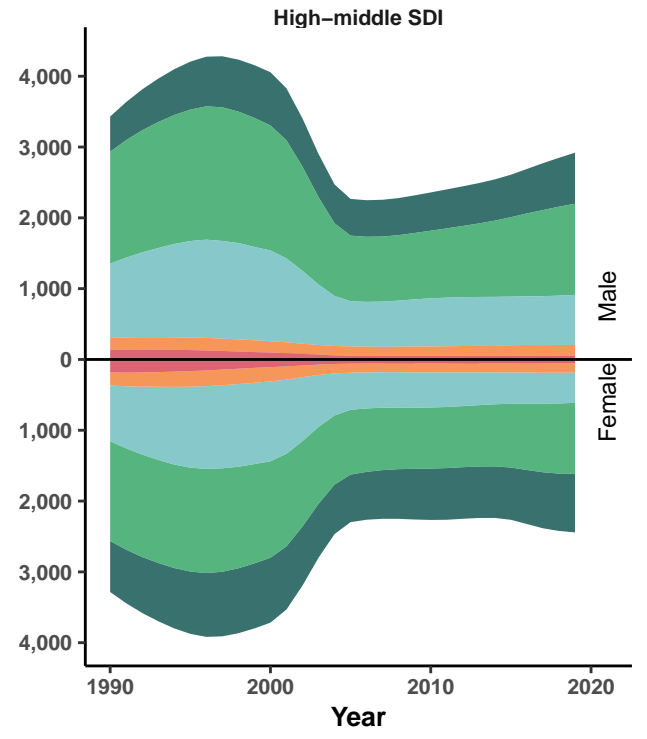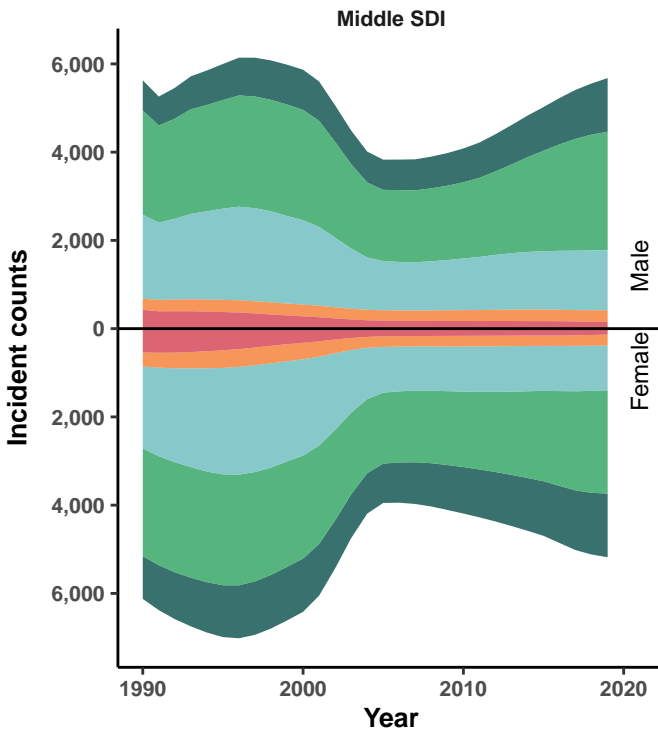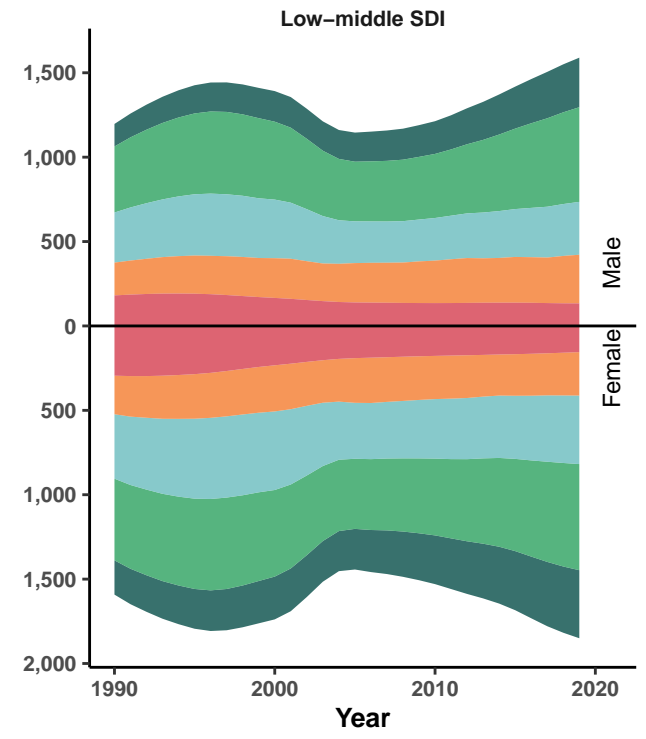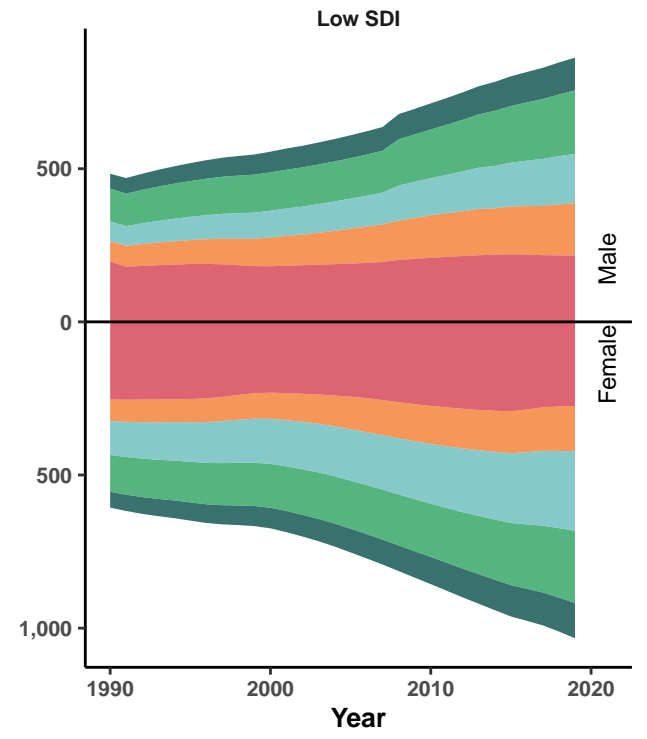

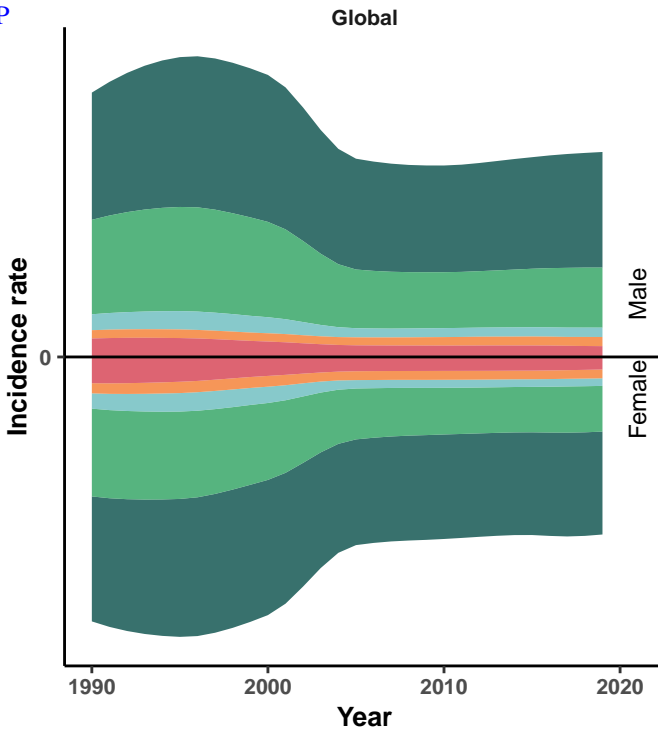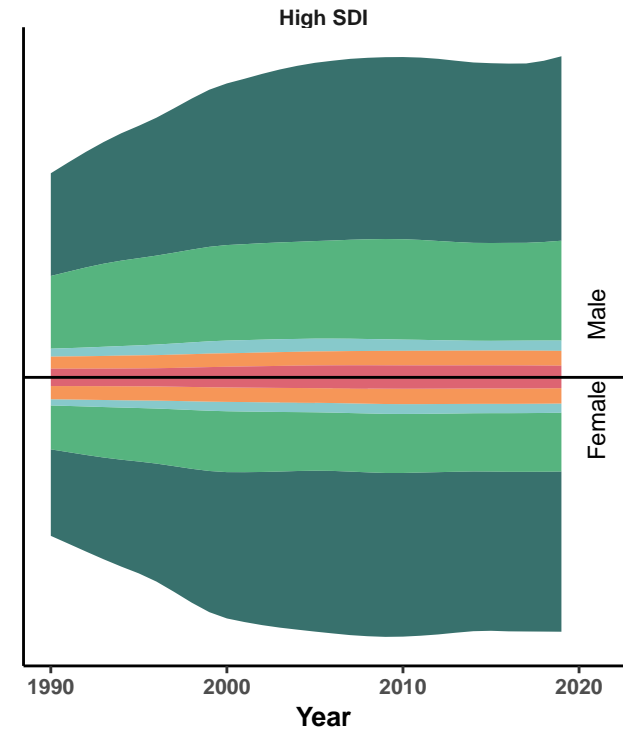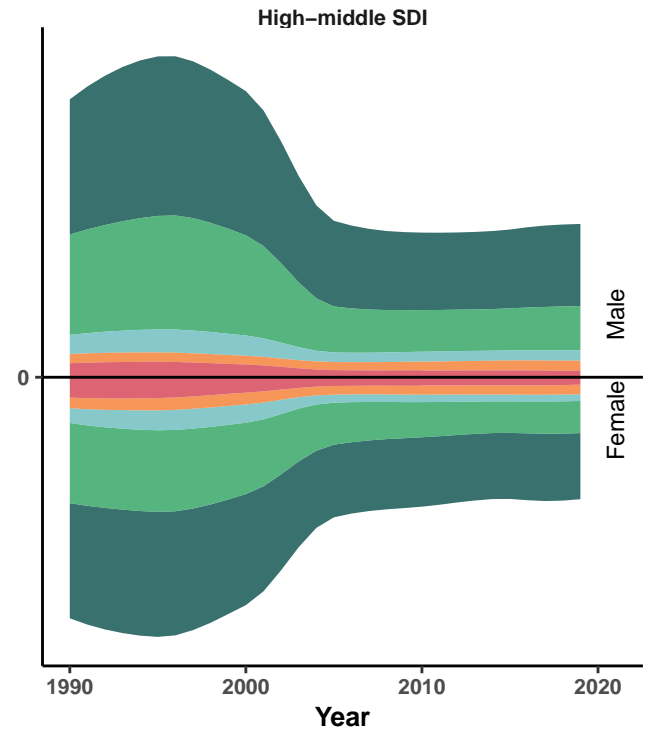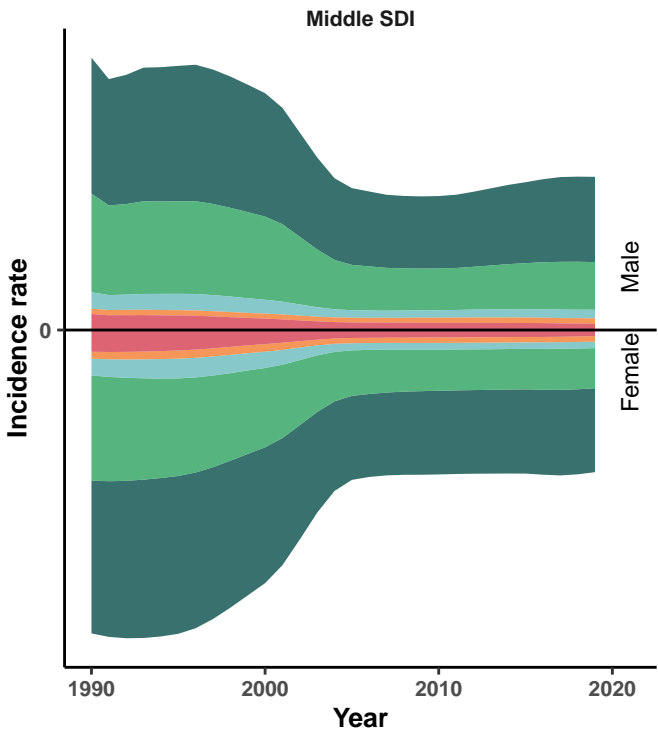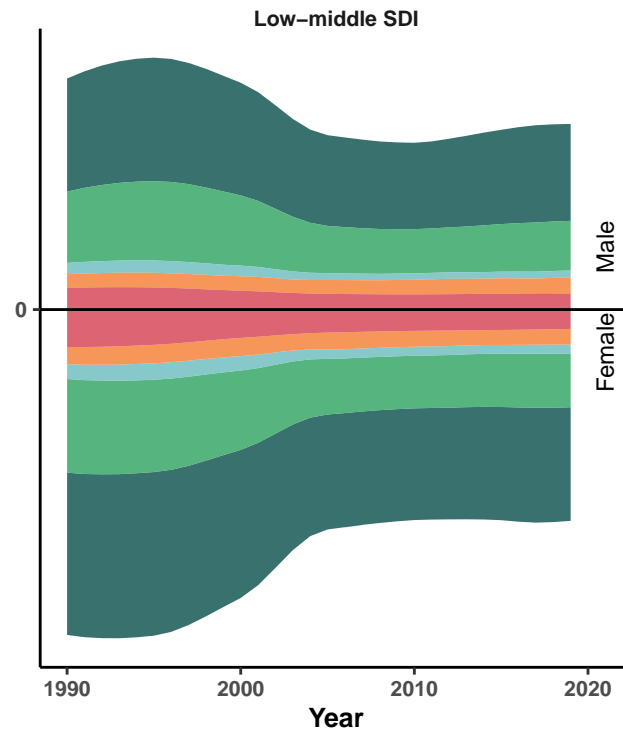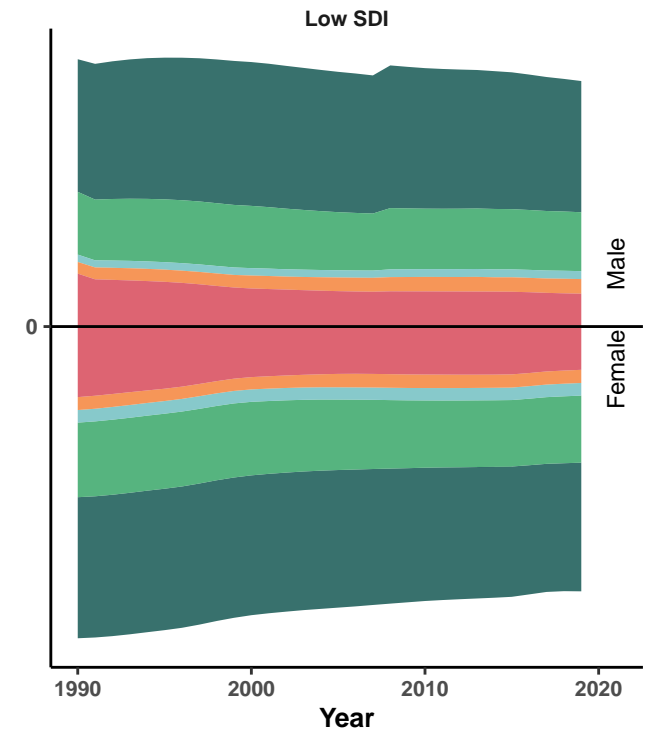

Supplement: CAM4-11-1310-s005.pdf [file CAM4-11-1310-s005.pdf]
