# Supplementary material for: Global burden of primary liver cancer by five etiologies and global prediction by 2035 based on global burden of disease study 2019
Source: PubMed Central journal article supplement (PMC8894698; doi:10.1002/cam4.4551), 2022-02-04

**A**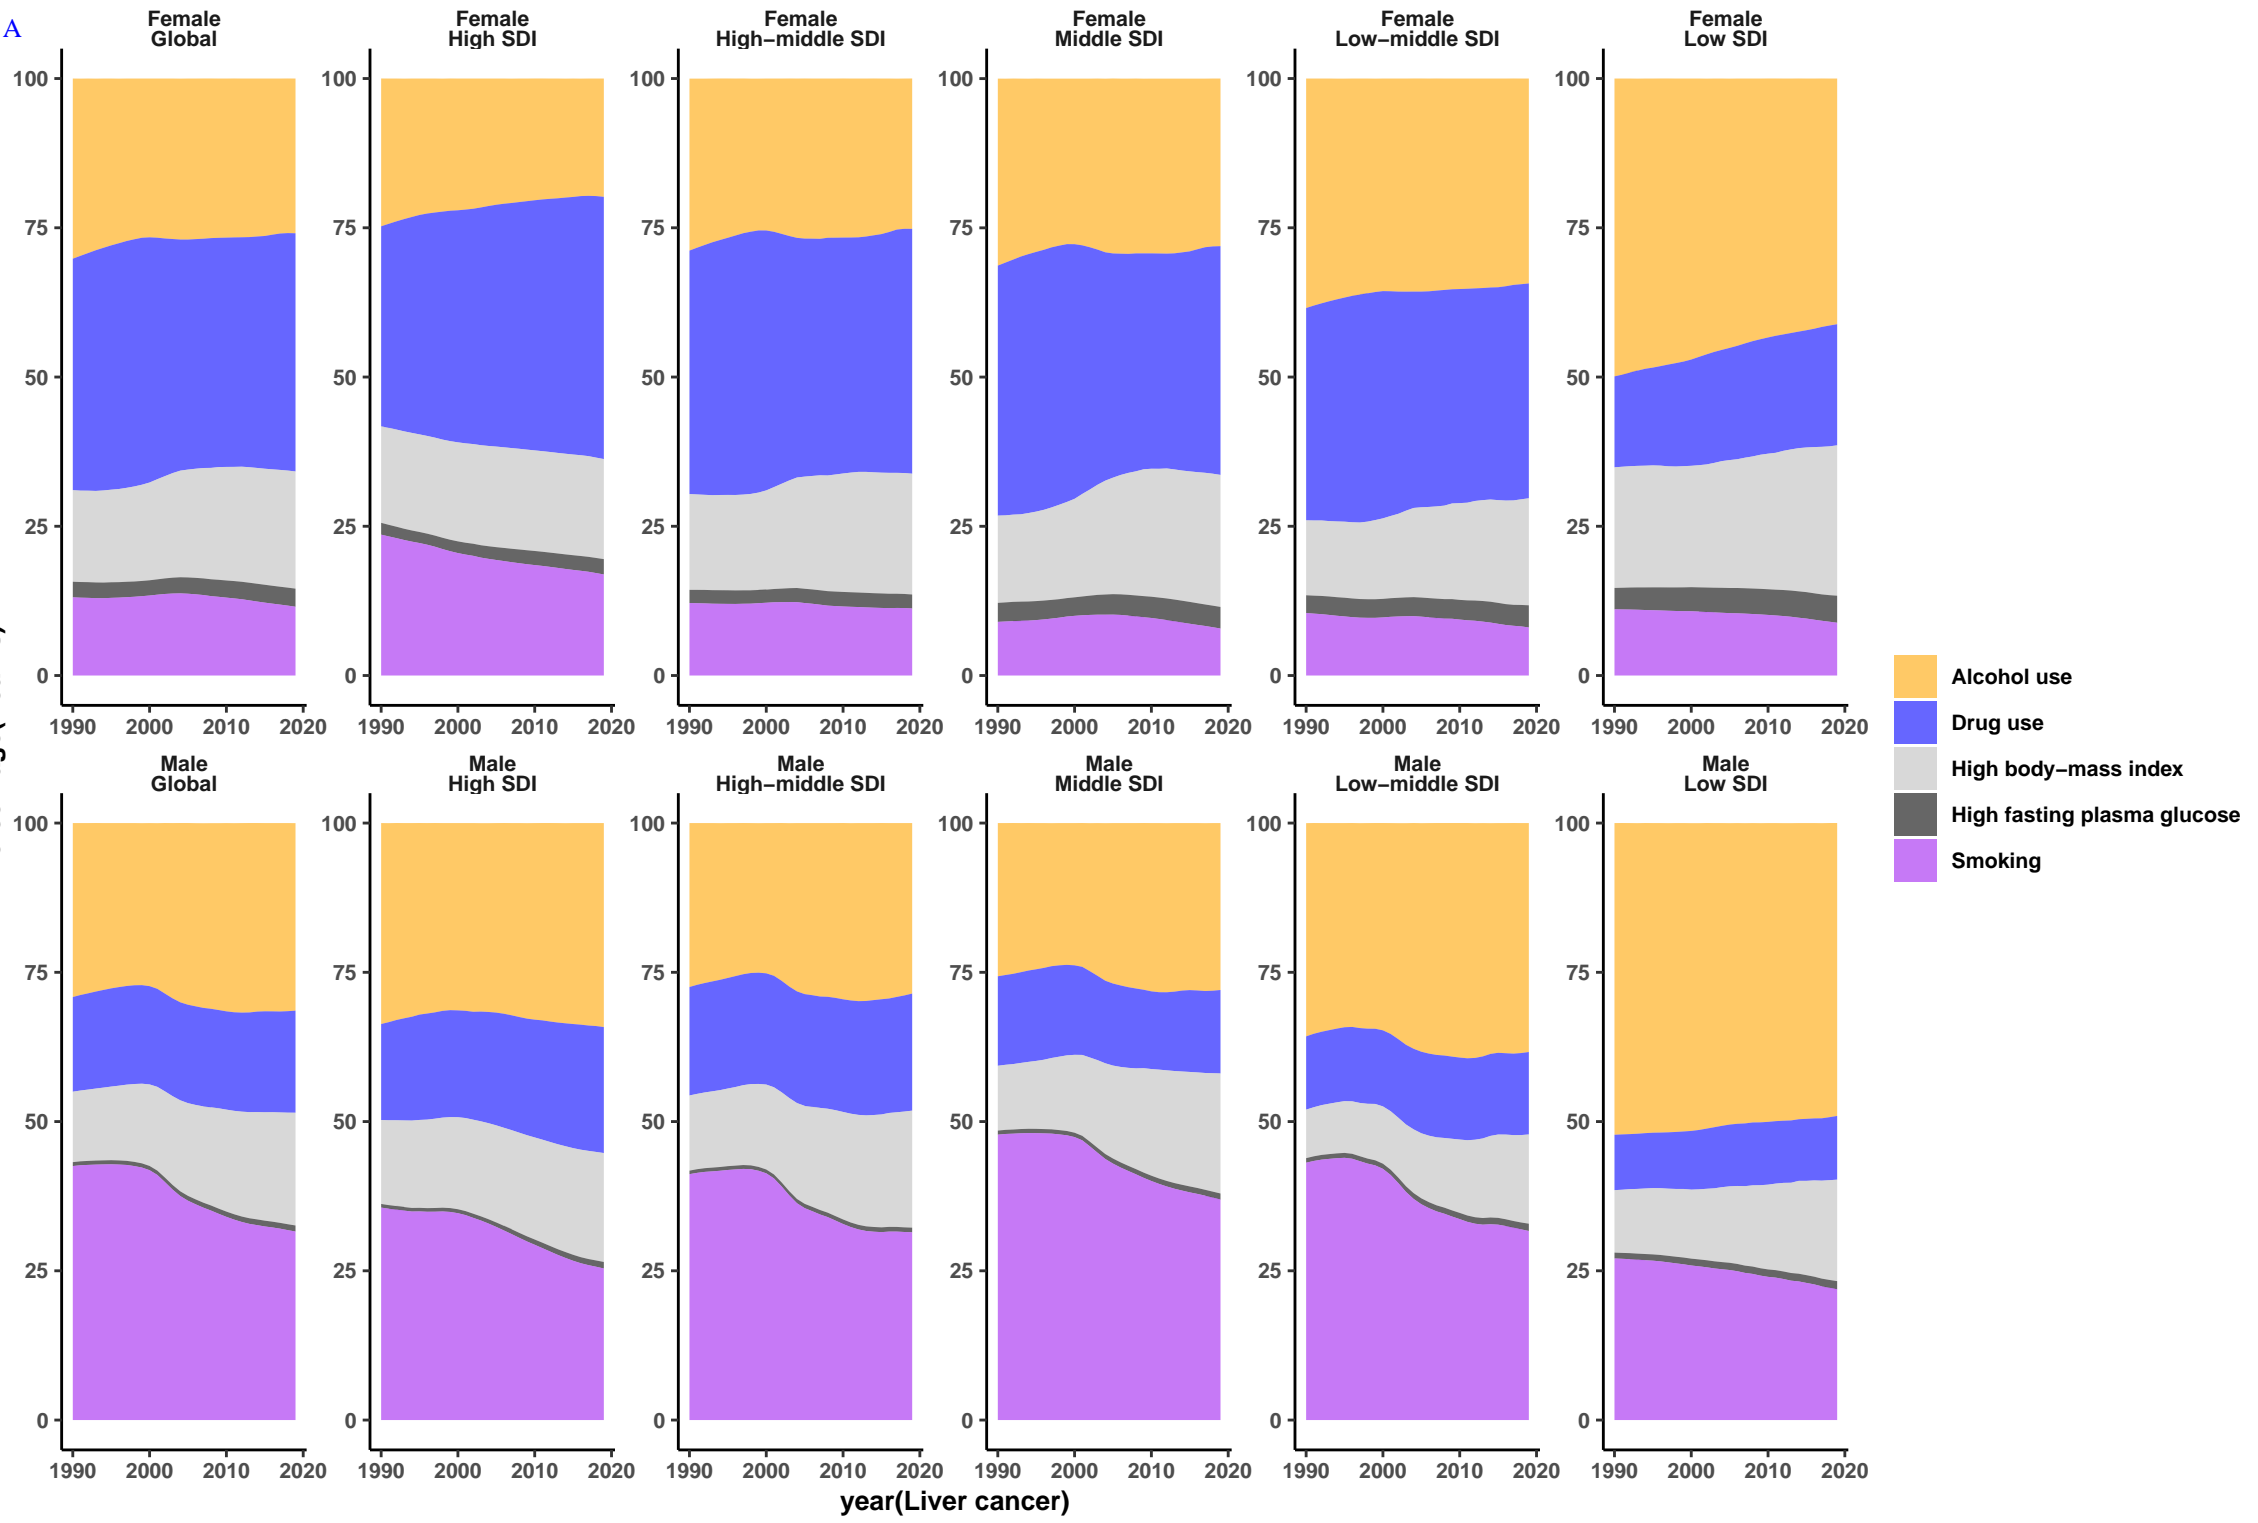

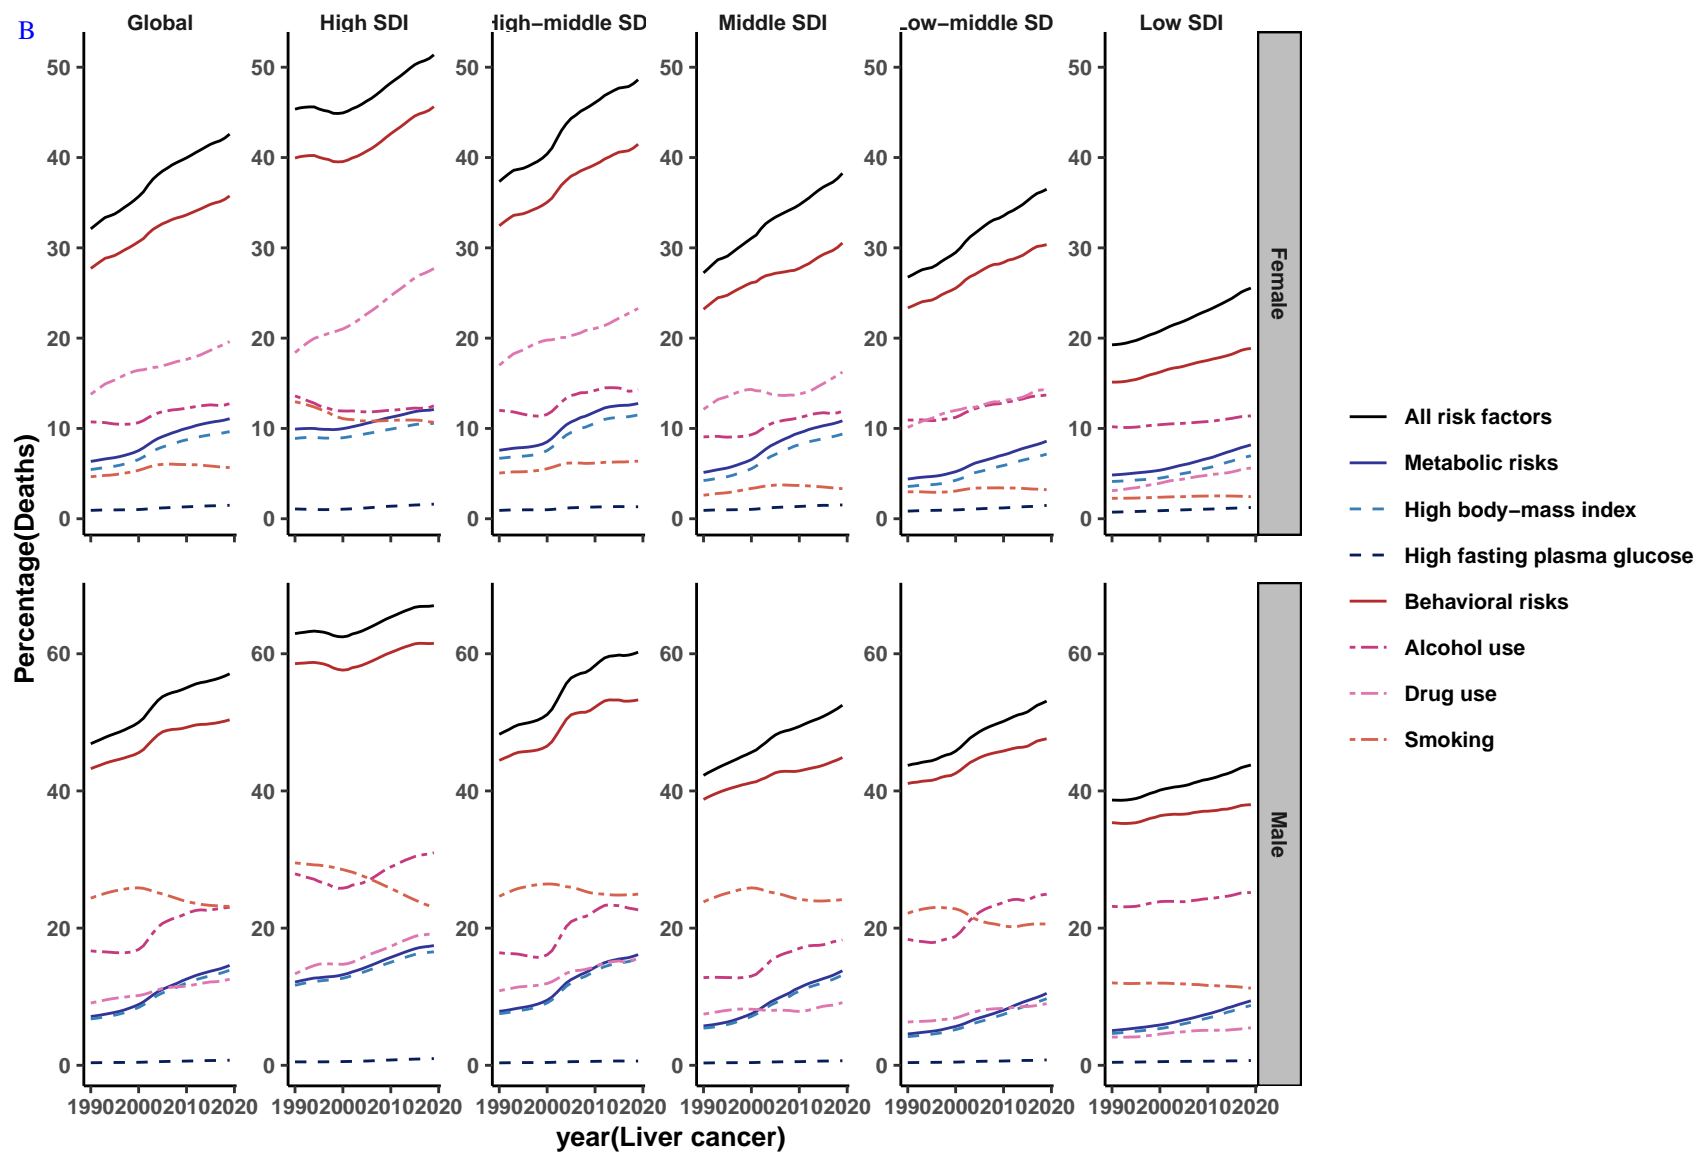

C

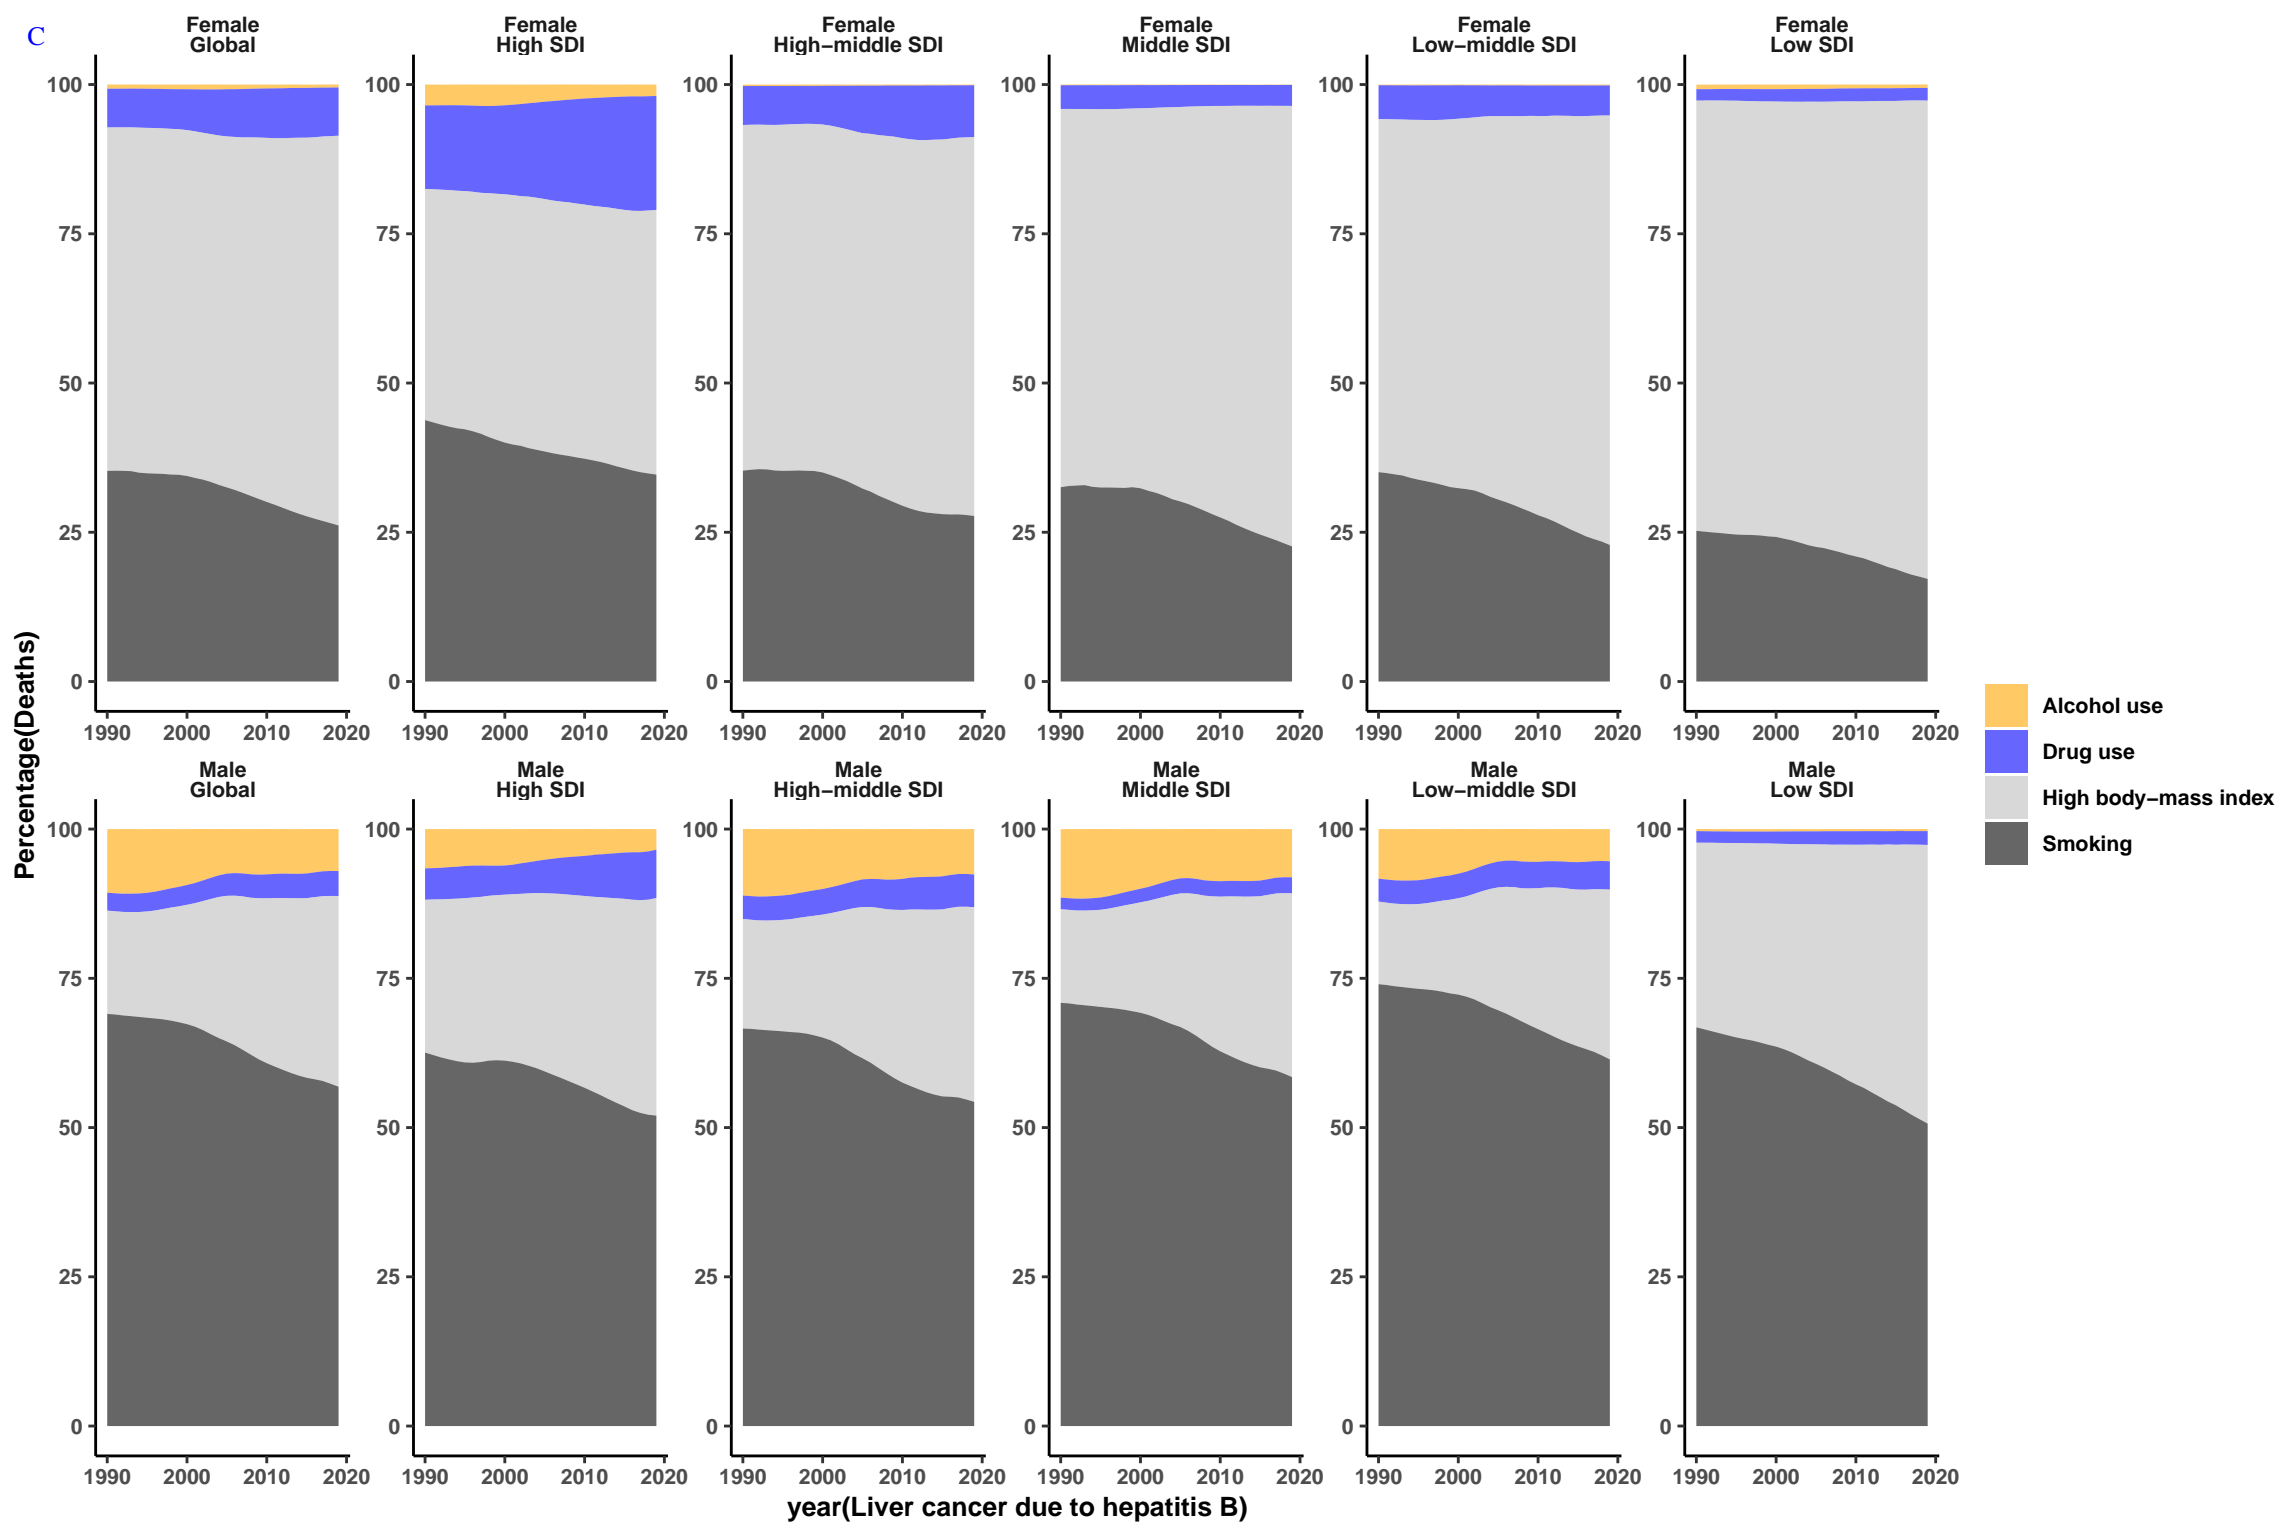

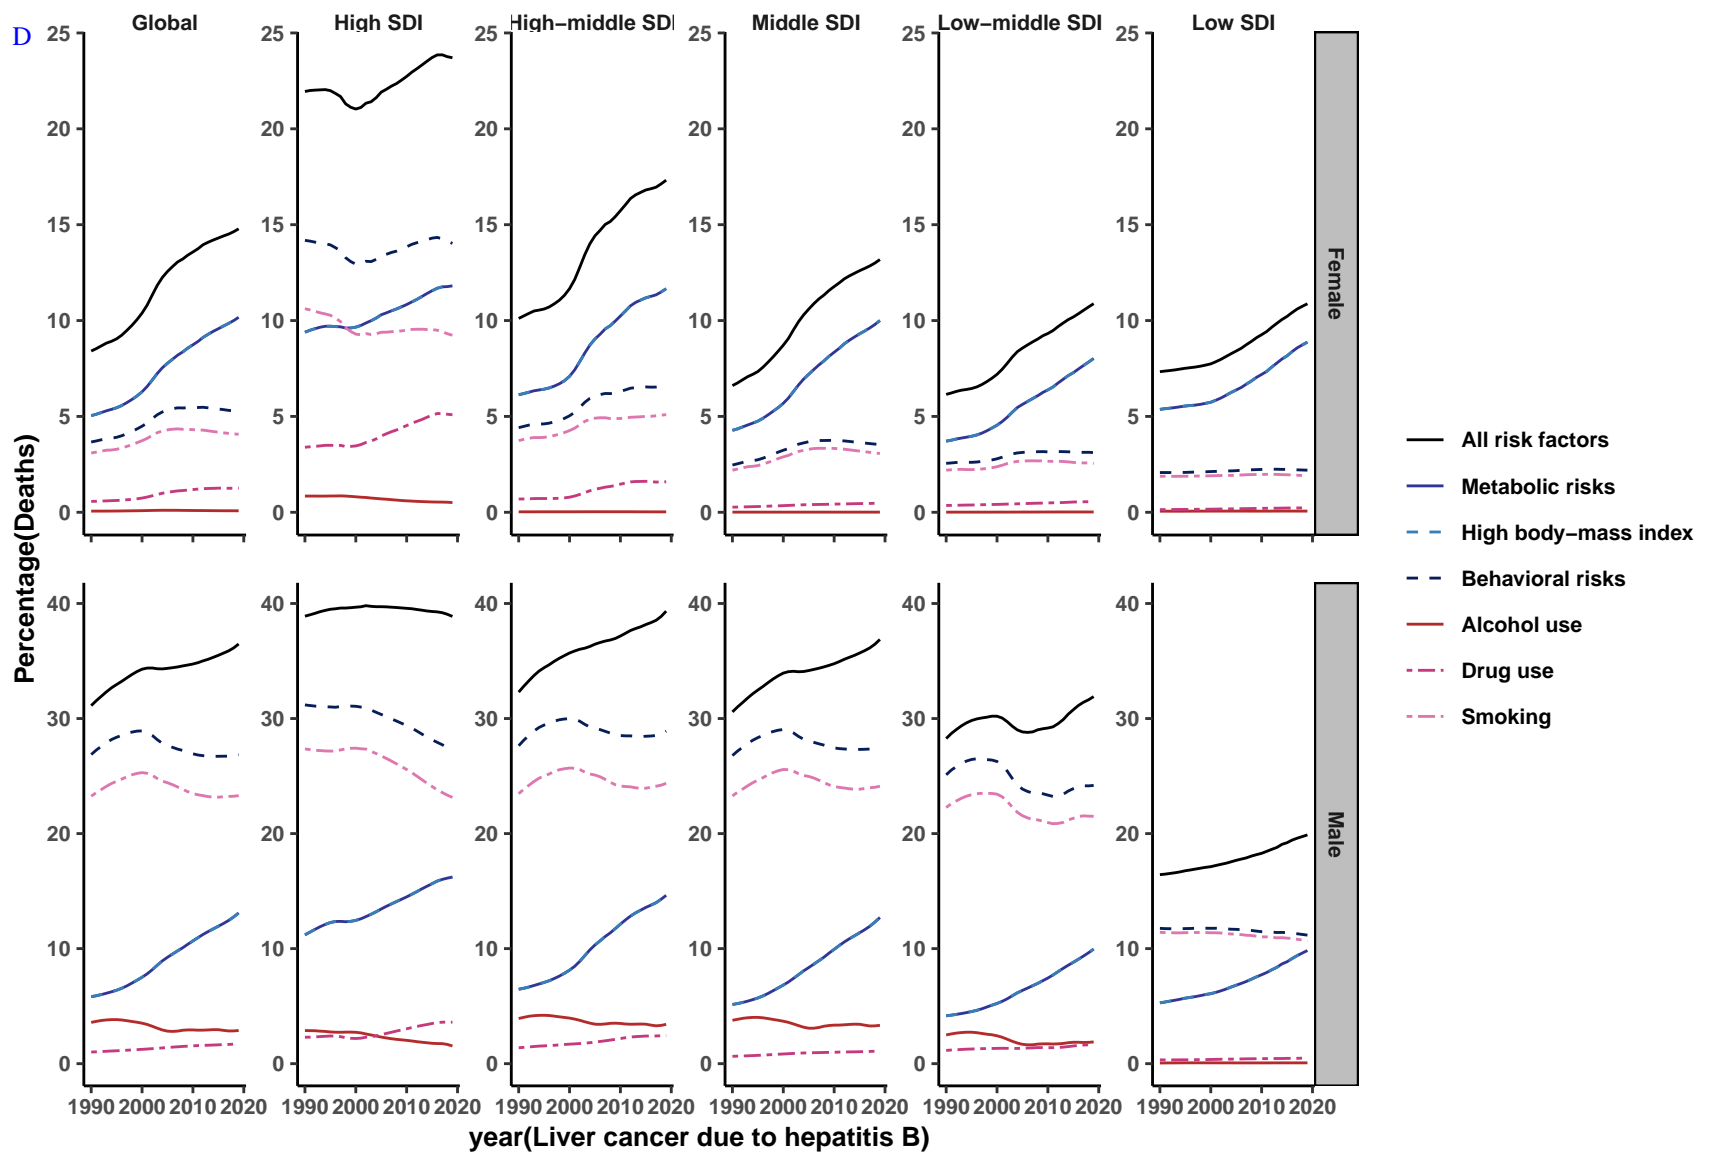

E

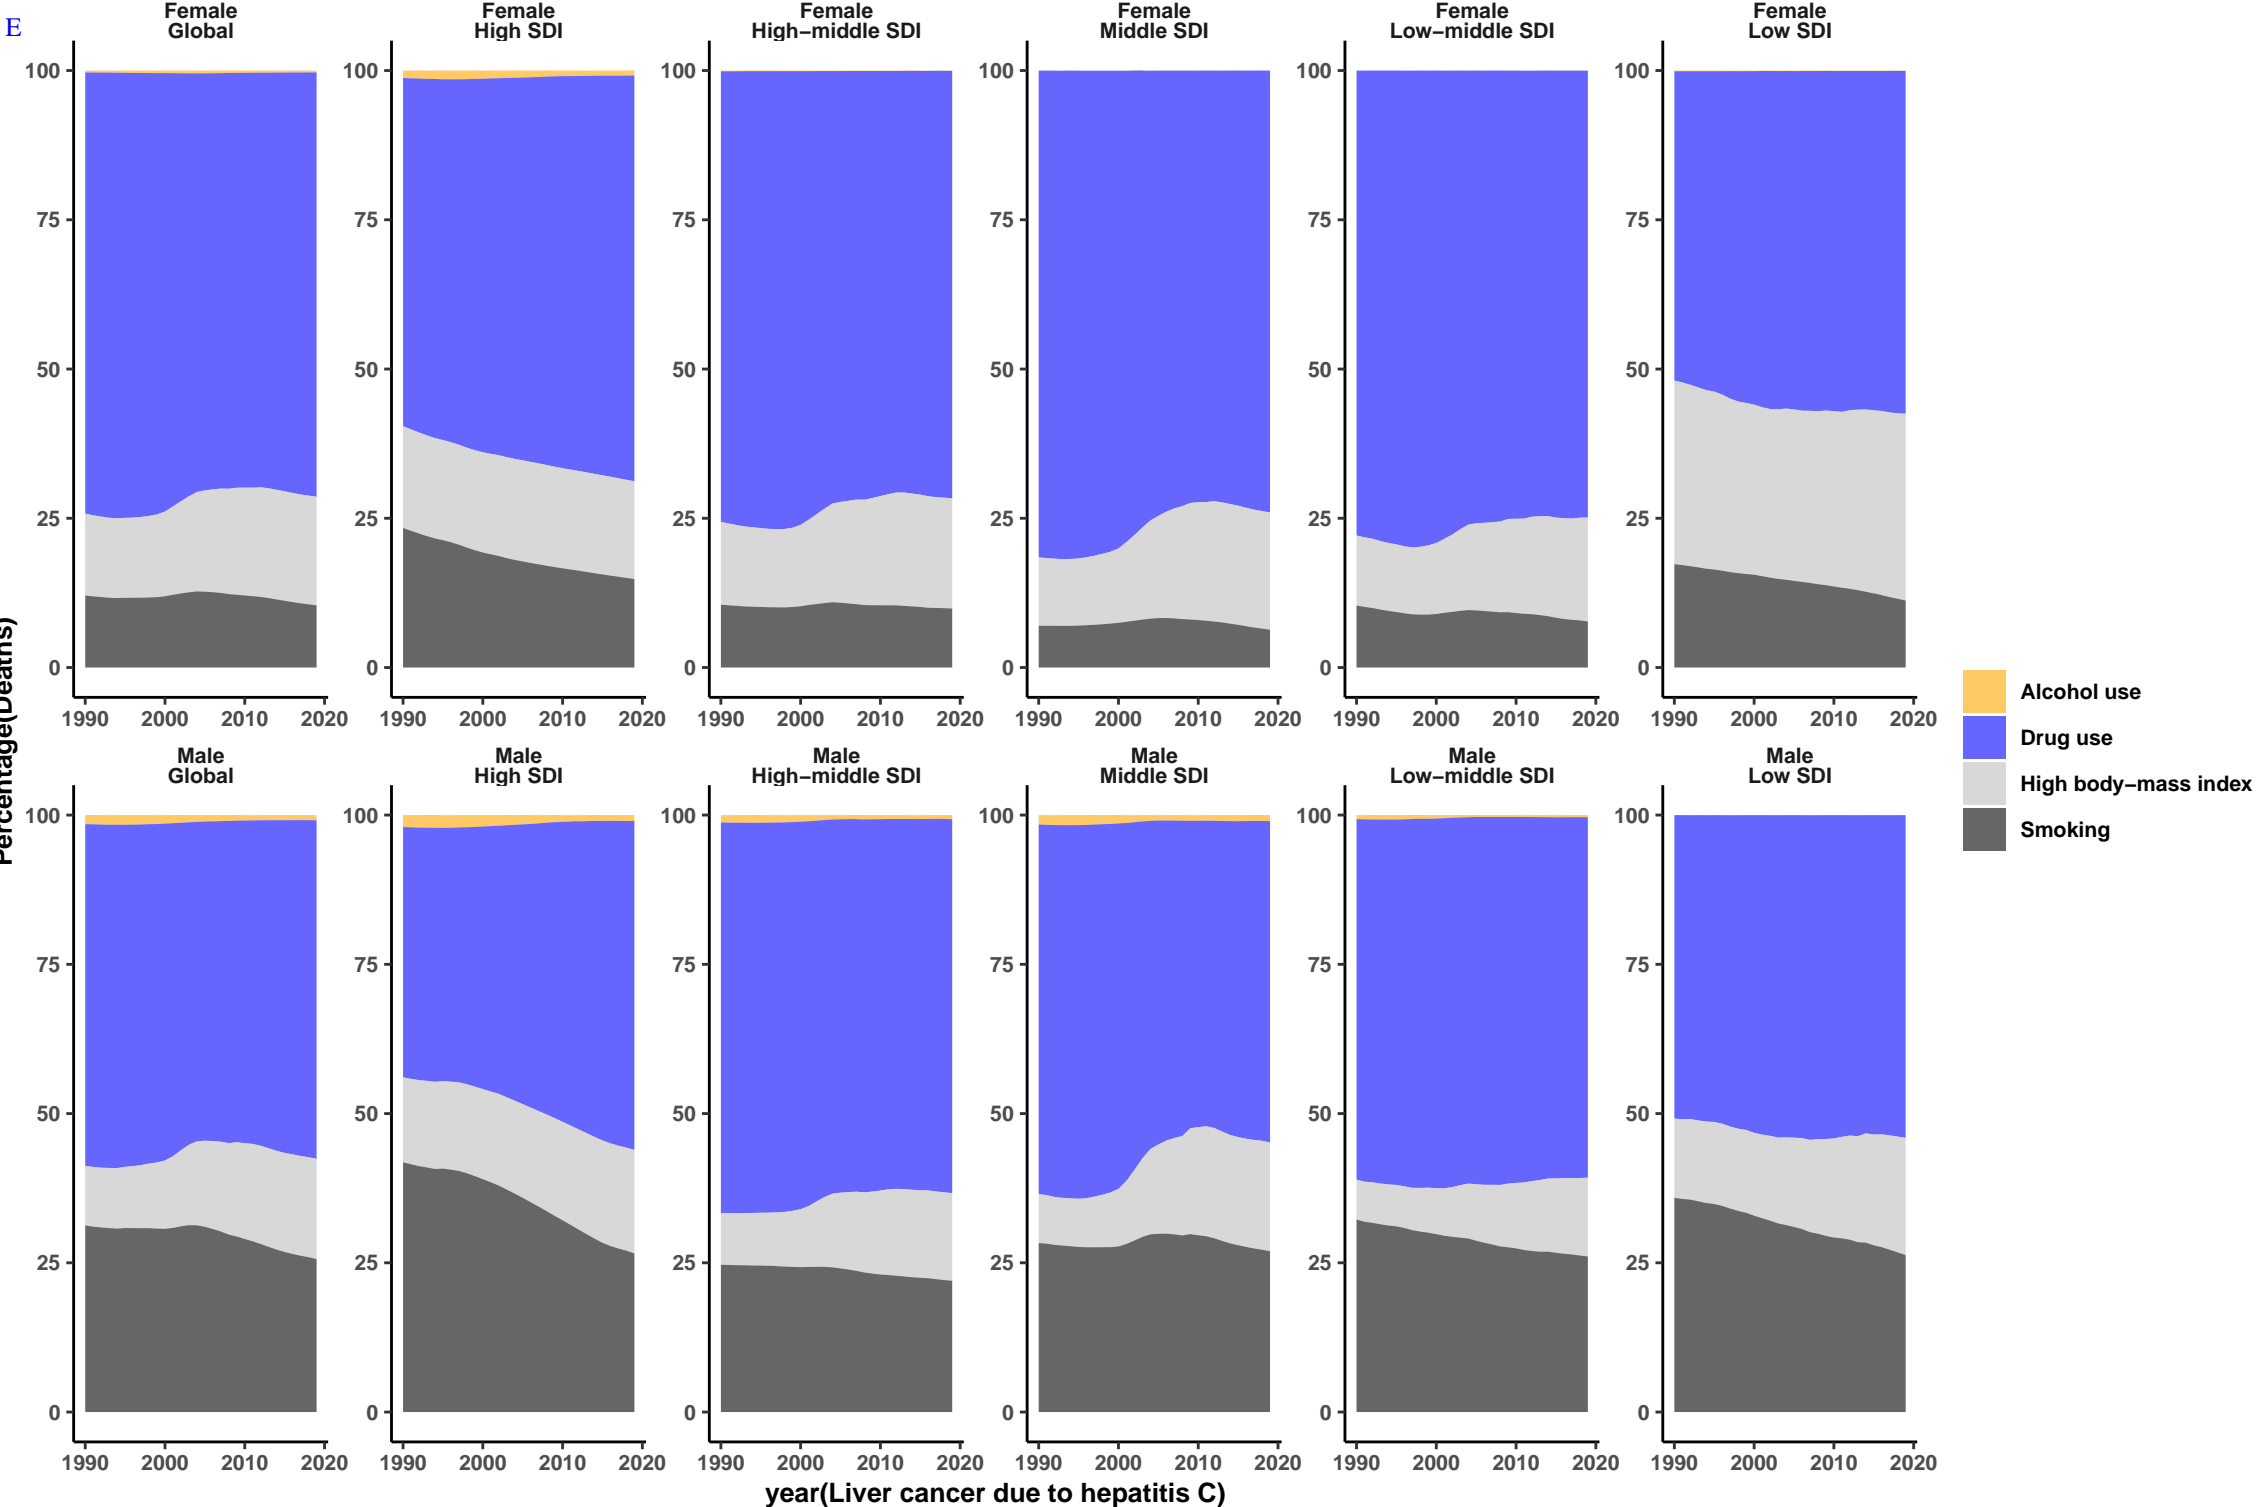

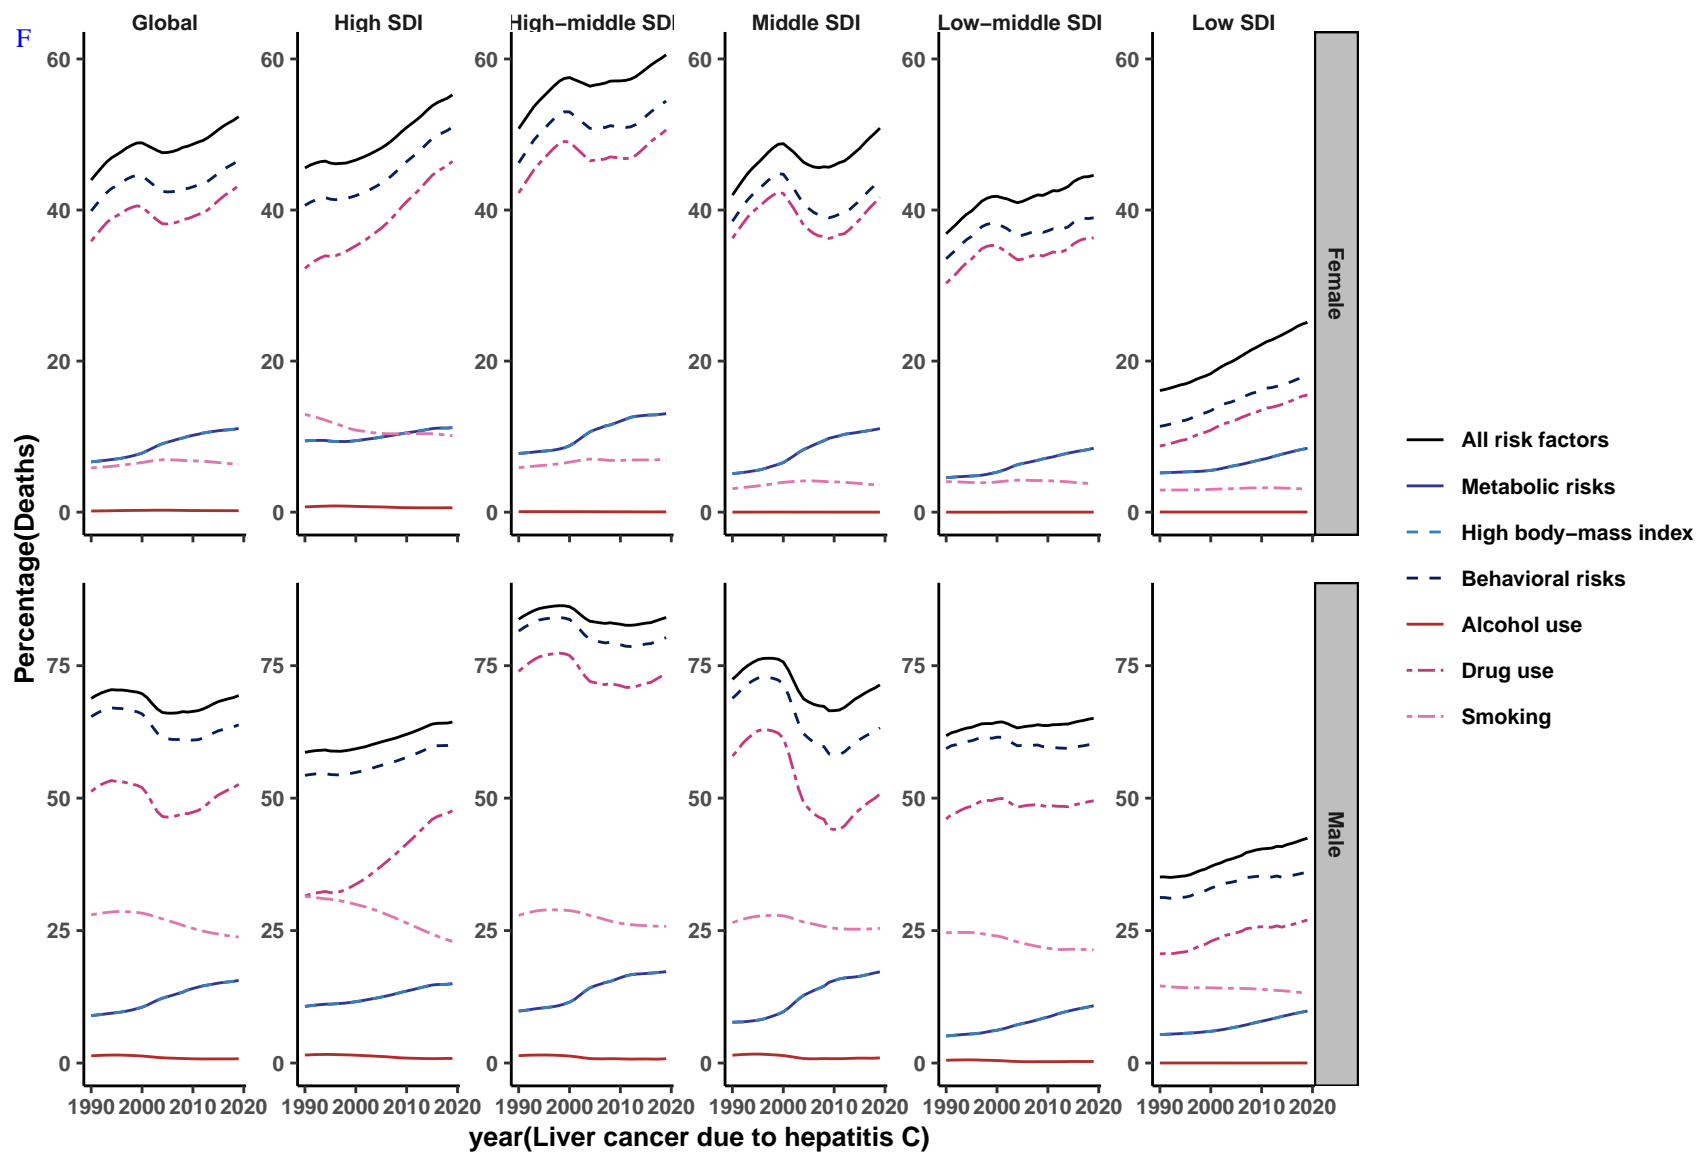

G

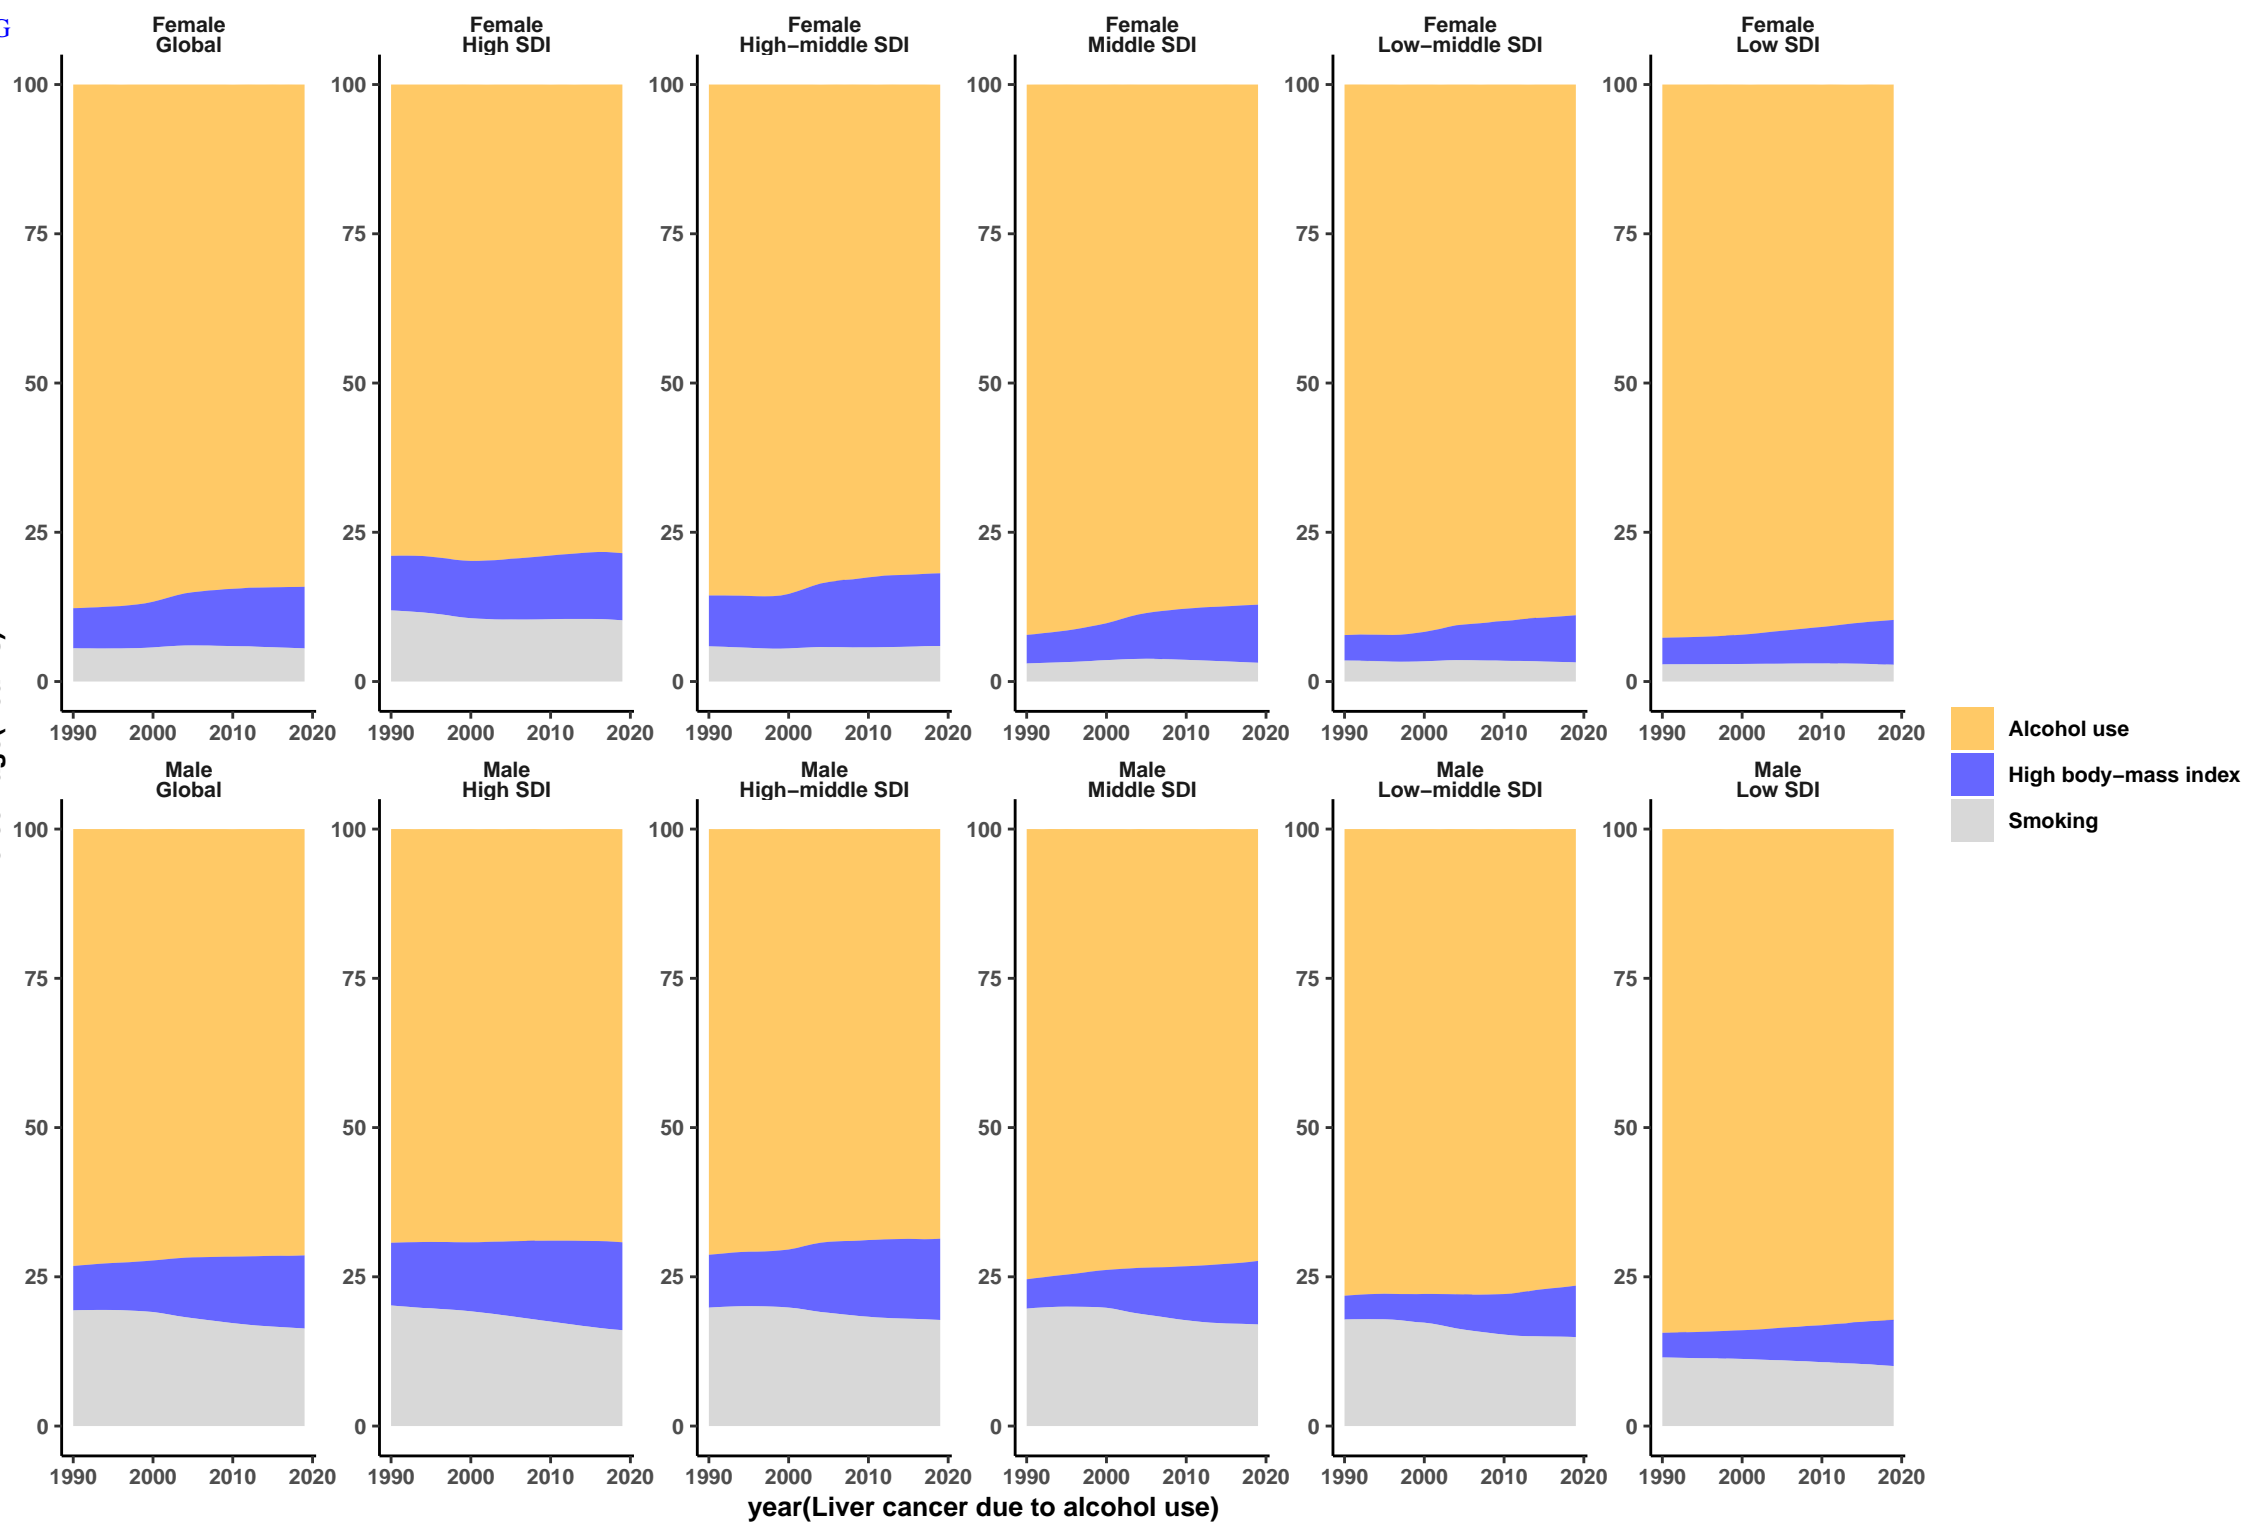

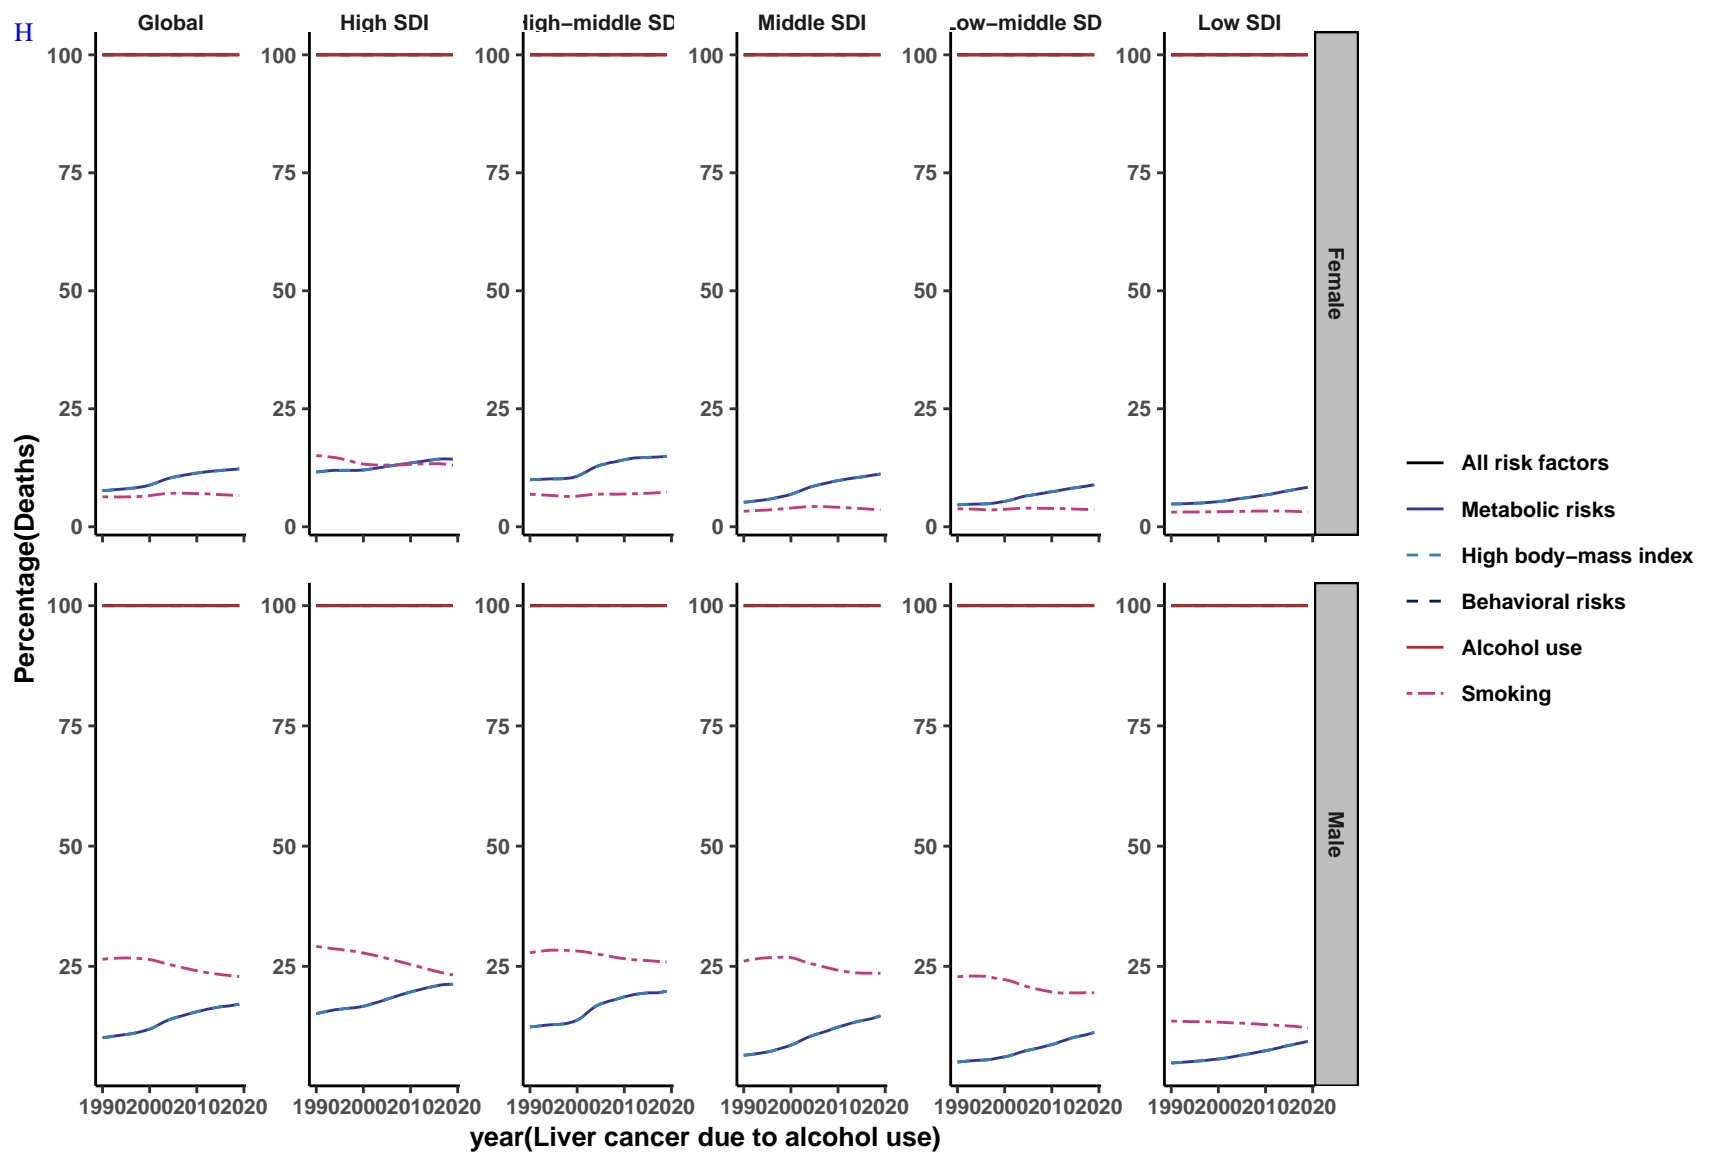



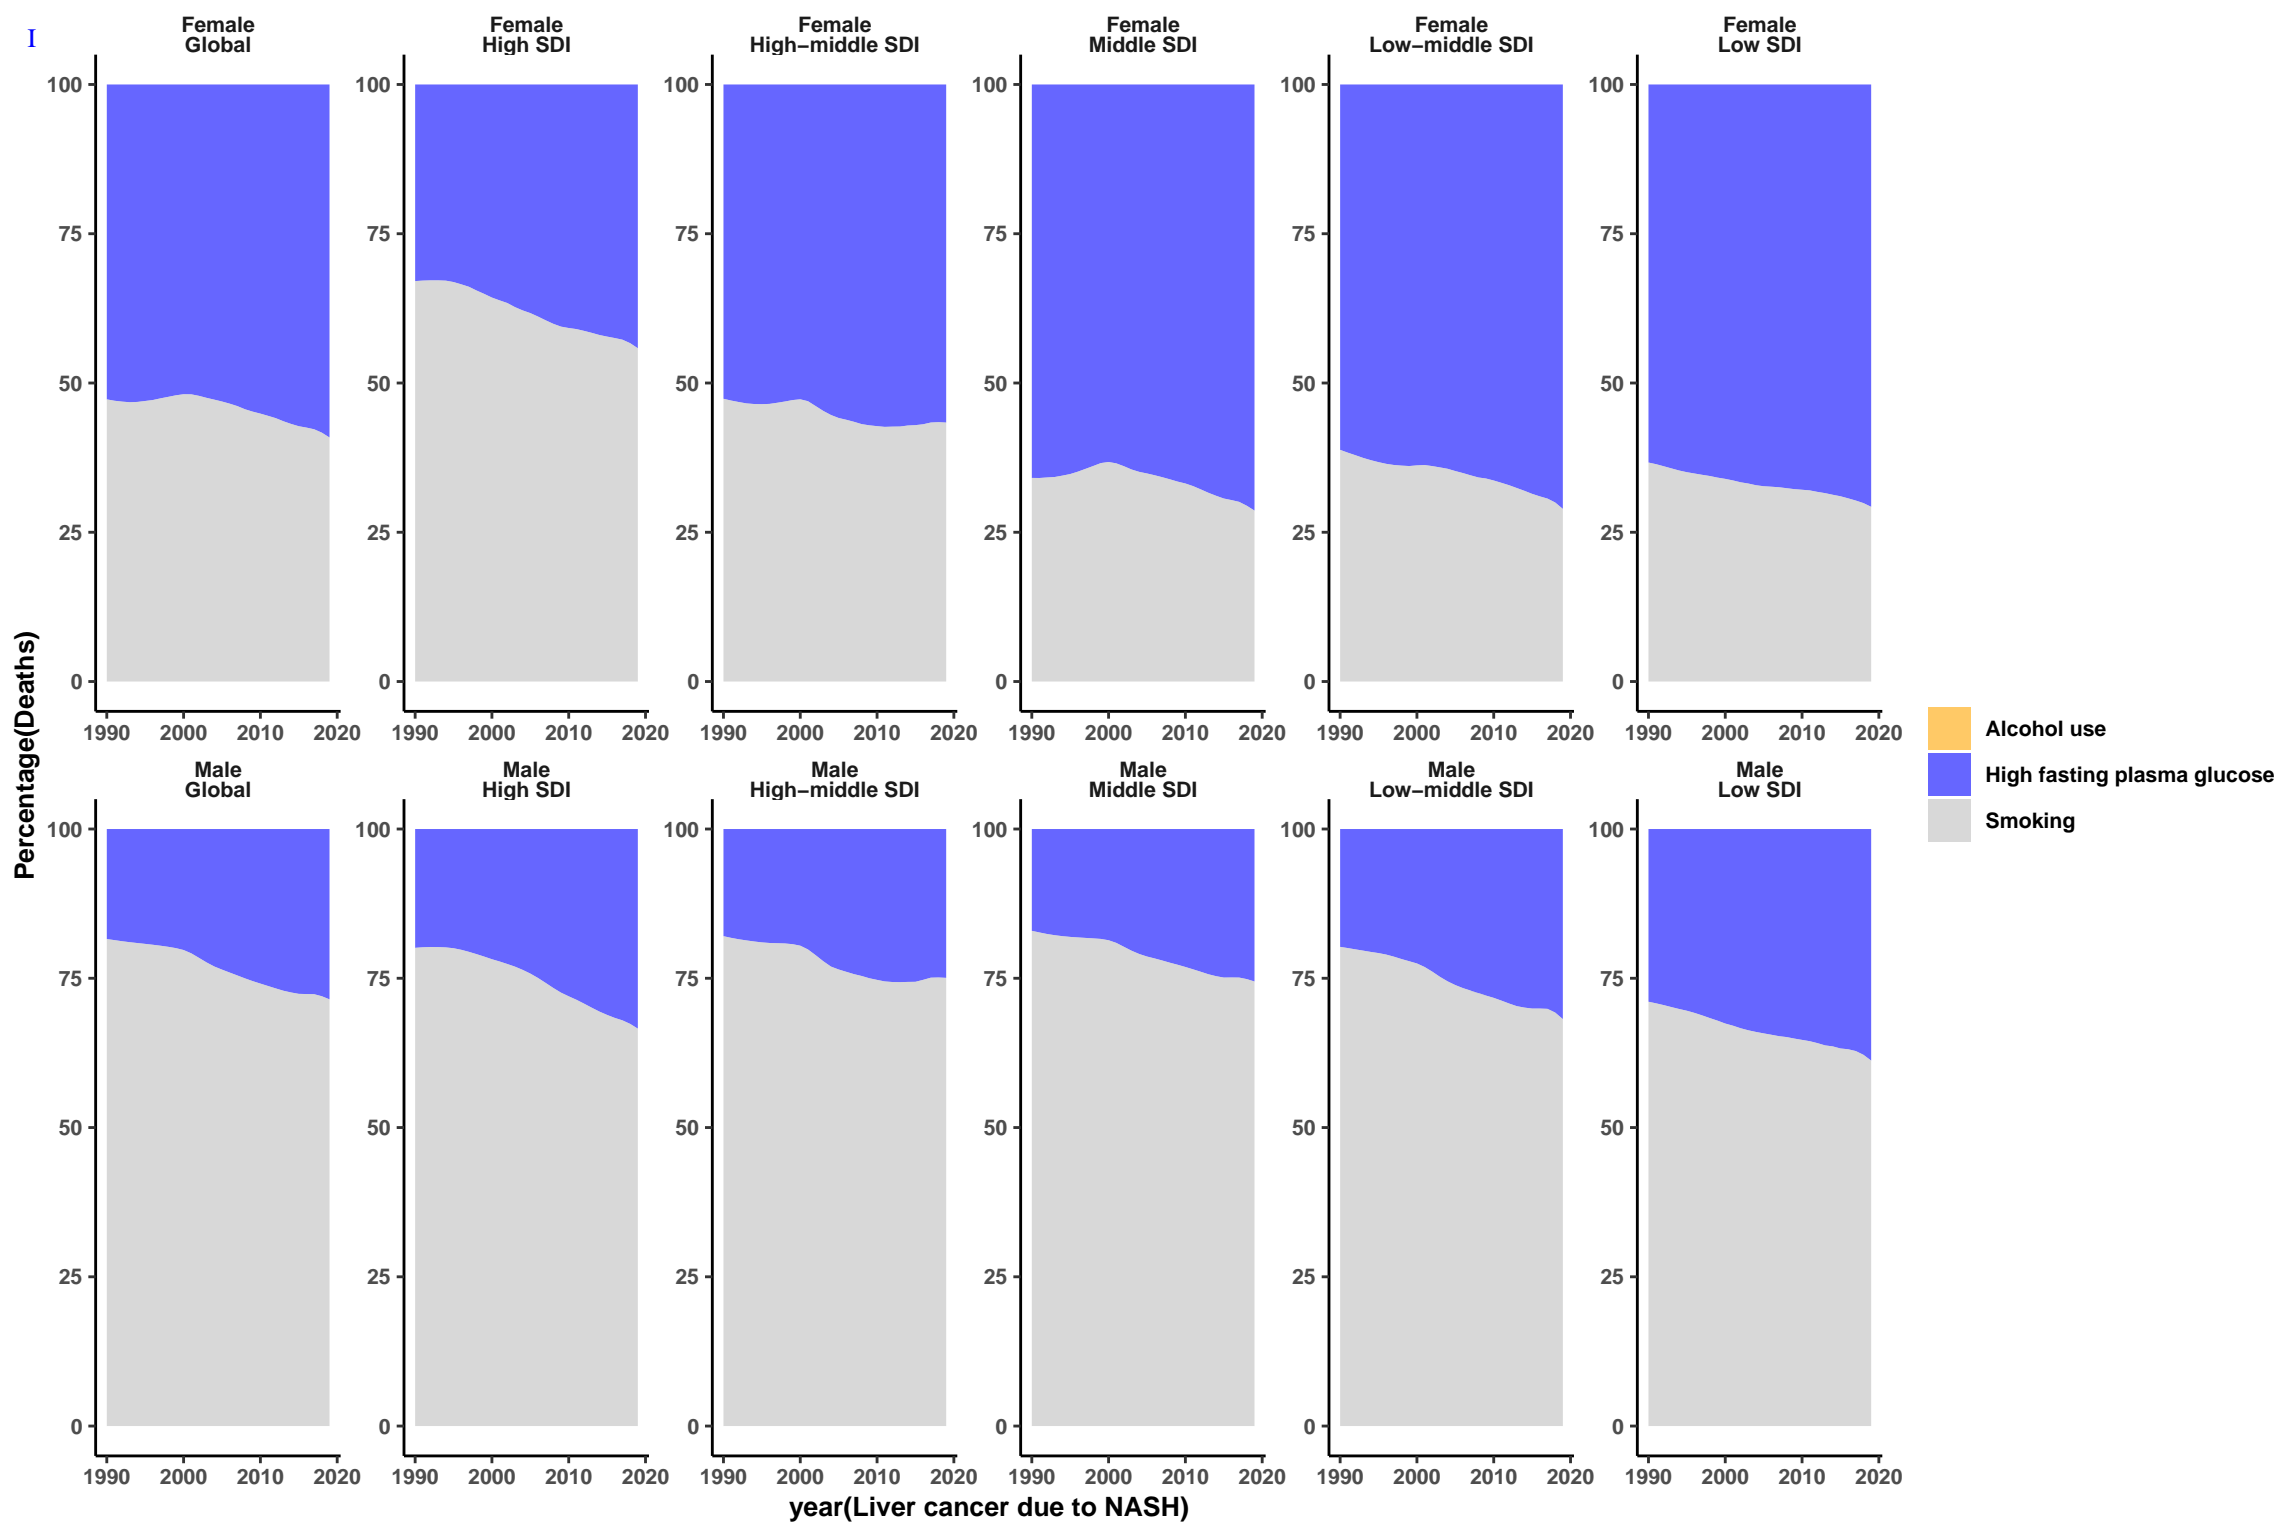

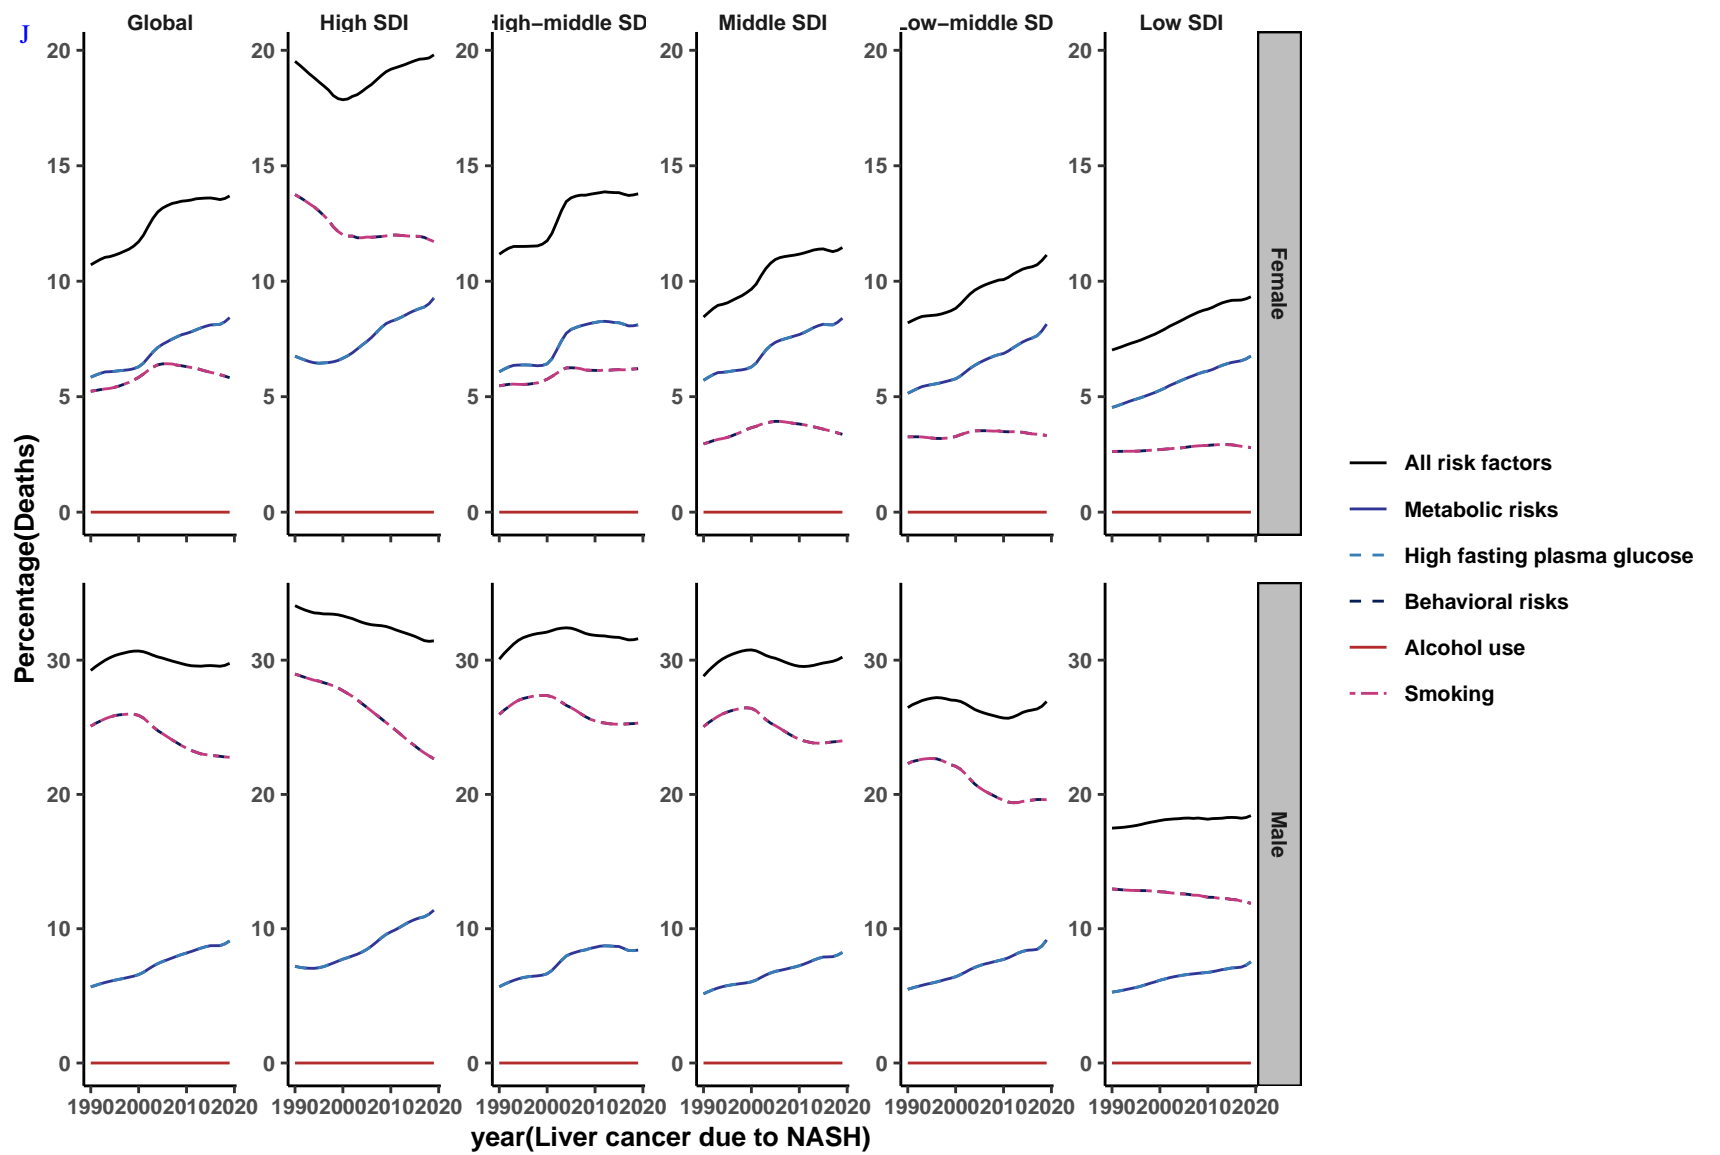

K

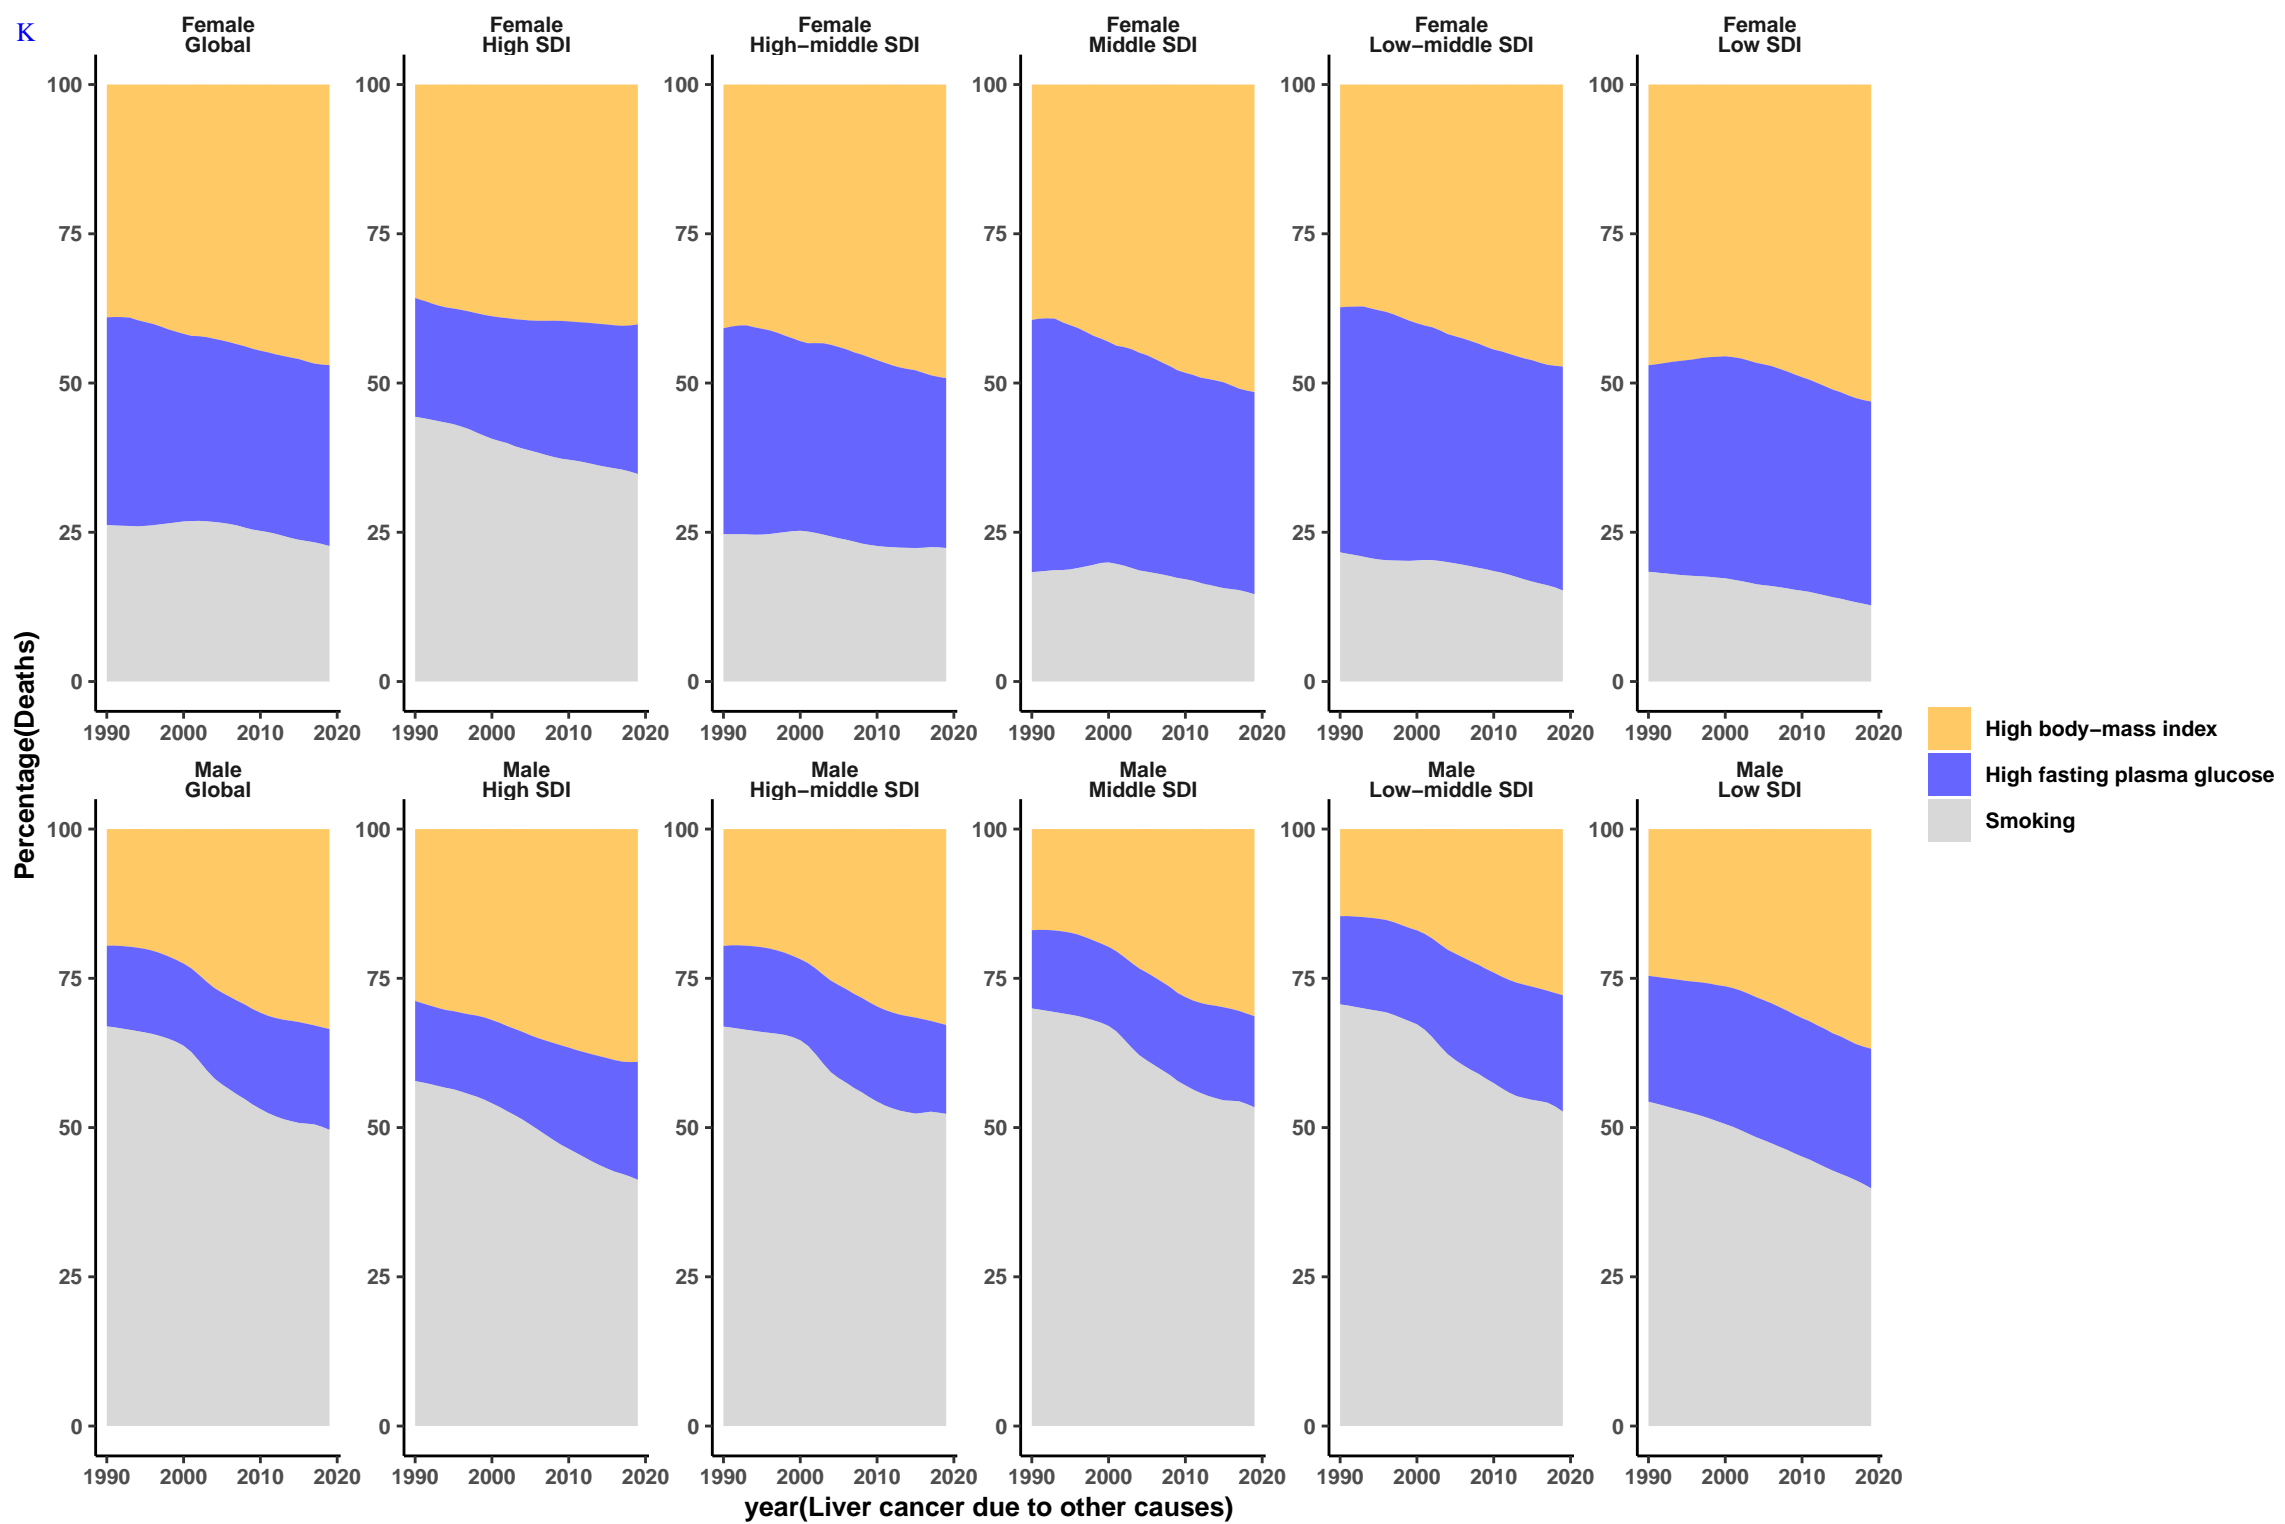

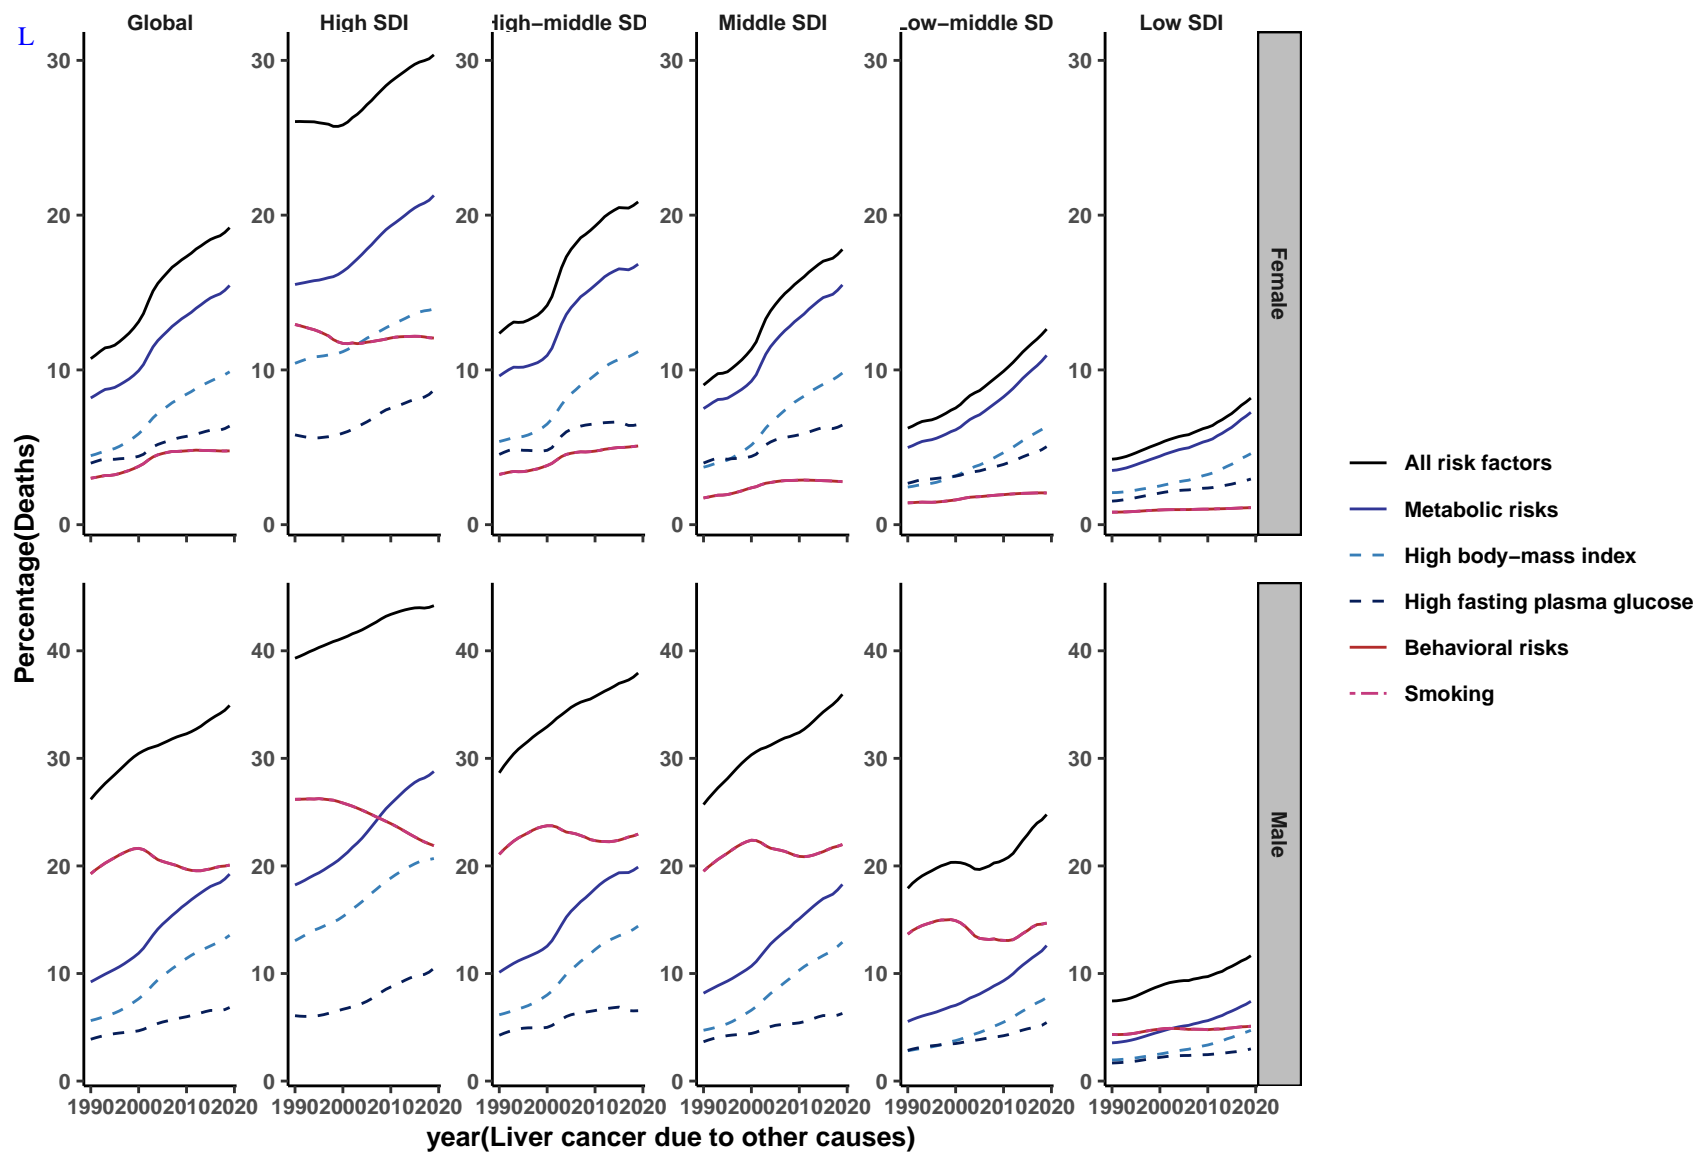

Supplement: CAM4-11-1310-s002.pdf [file CAM4-11-1310-s002.pdf]
