# Supplementary material for: Global burden of primary liver cancer by five etiologies and global prediction by 2035 based on global burden of disease study 2019
Source: PubMed Central journal article supplement (PMC8894698; doi:10.1002/cam4.4551), 2022-02-04
Supplement: CAM4-11-1310-s003.pdf [file CAM4-11-1310-s003.pdf]

B Incidence ASR and SDI in National level from 1990–2019

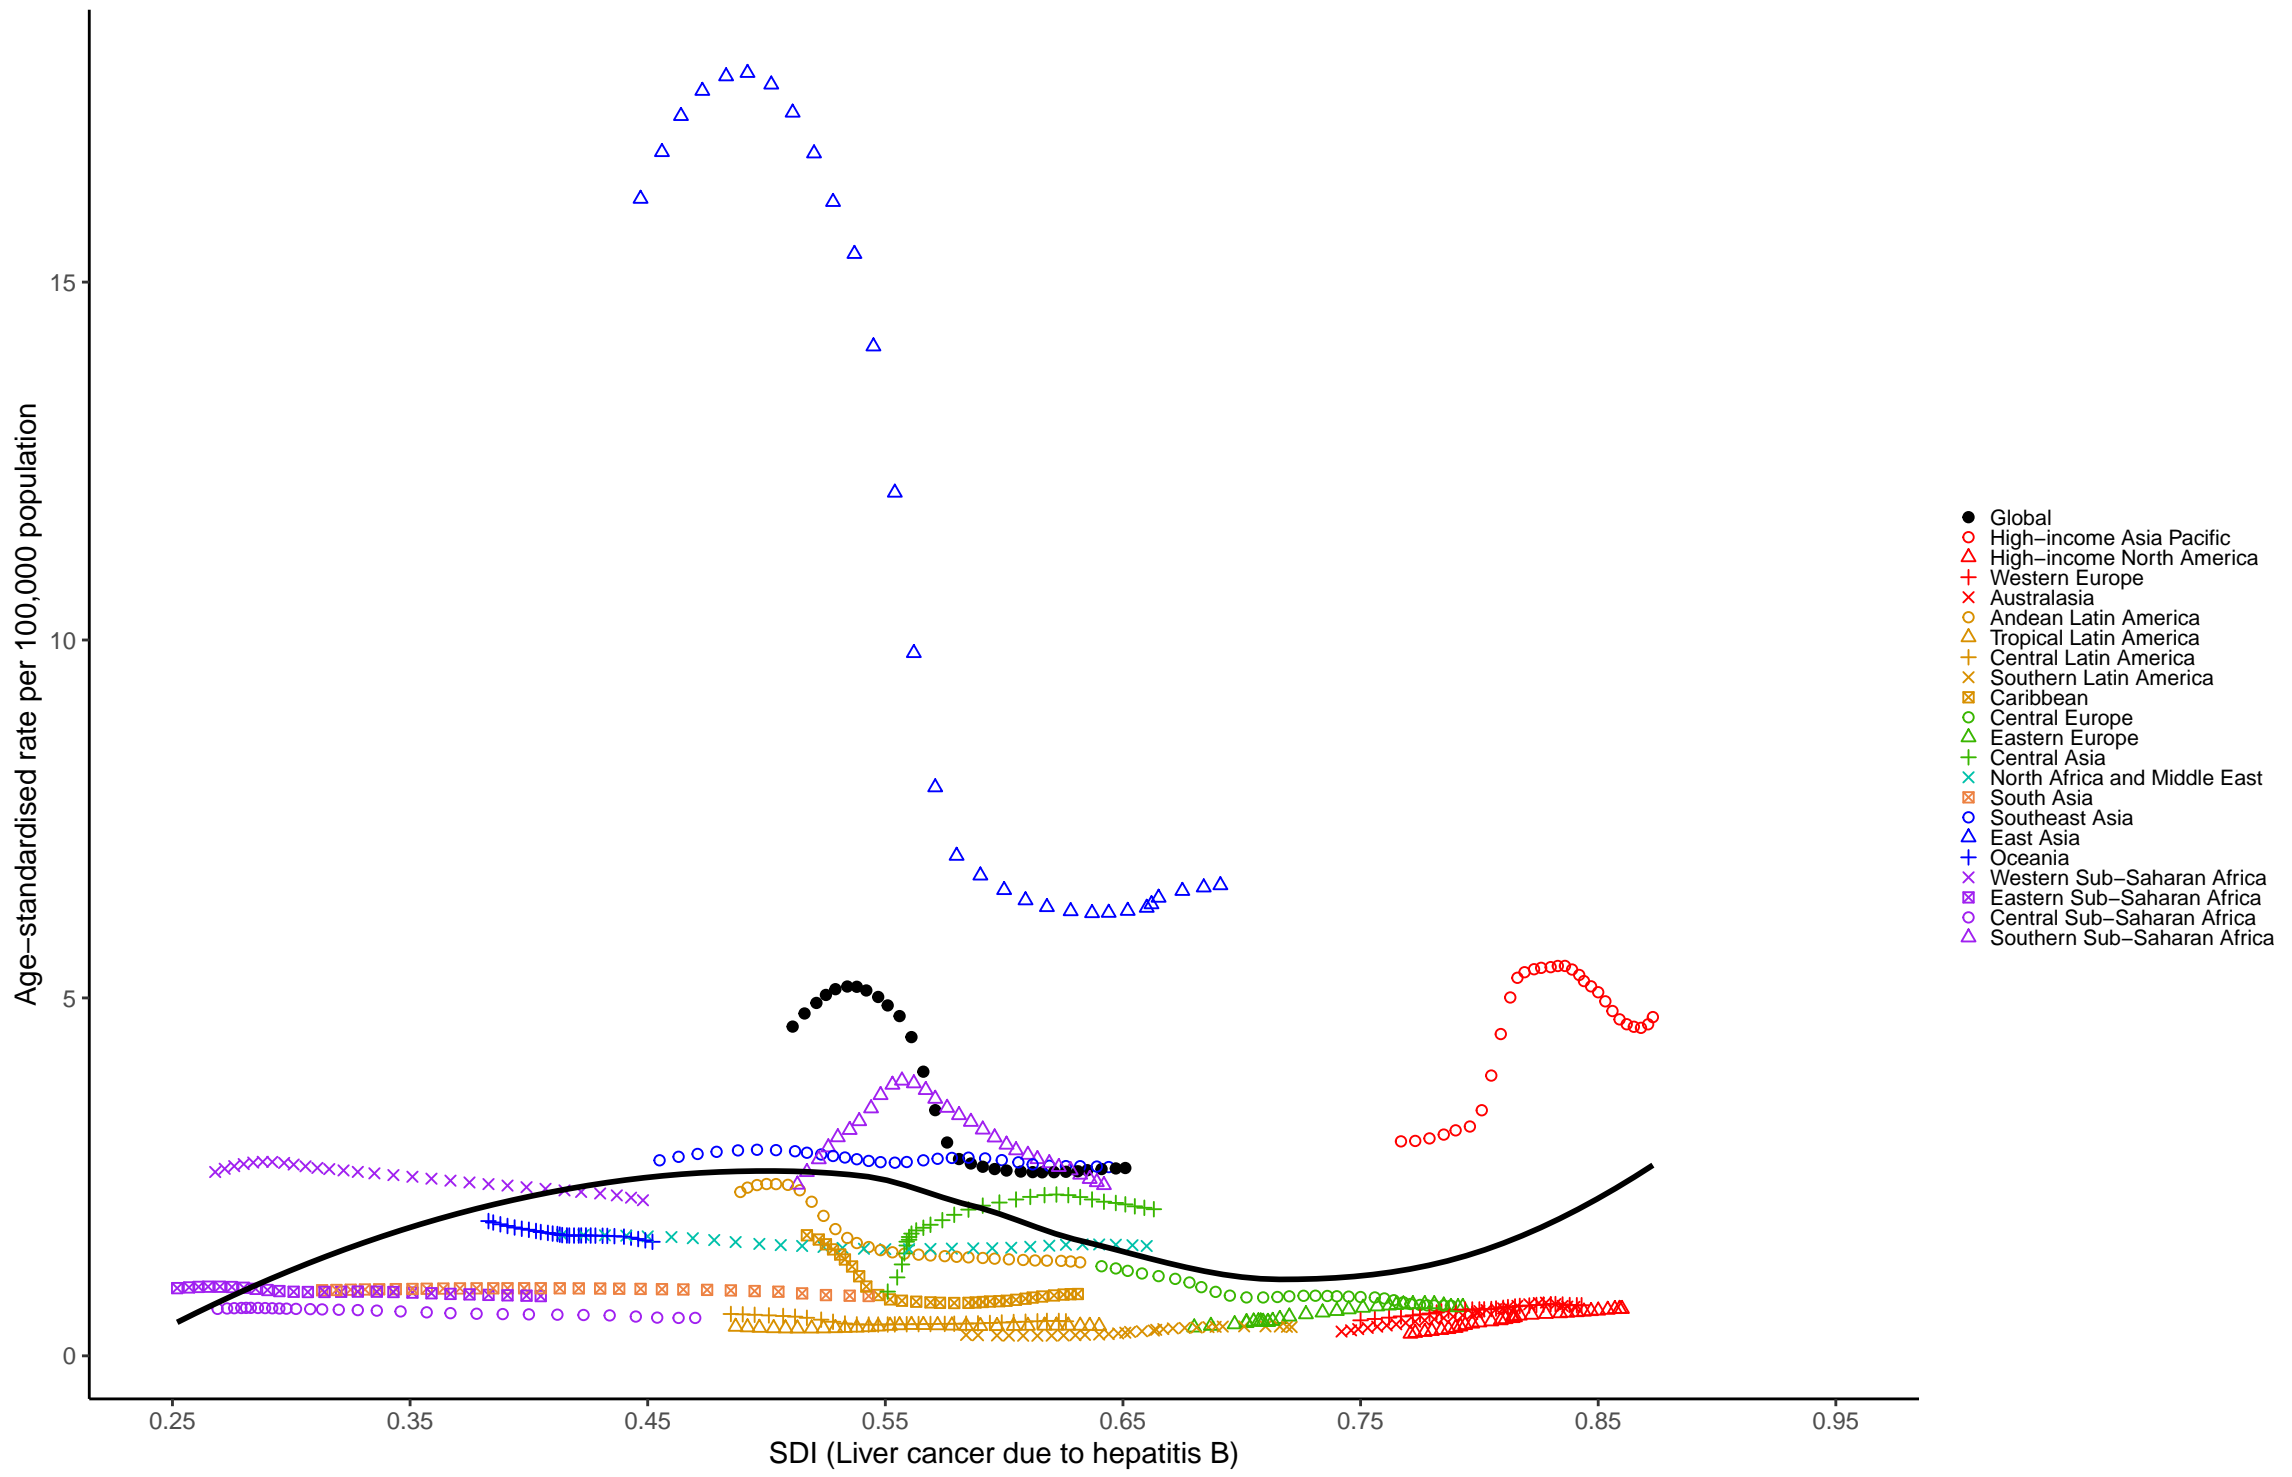

# Incidence ASR and SDI in National level

Age-standardised incidence rate per 100,000 population

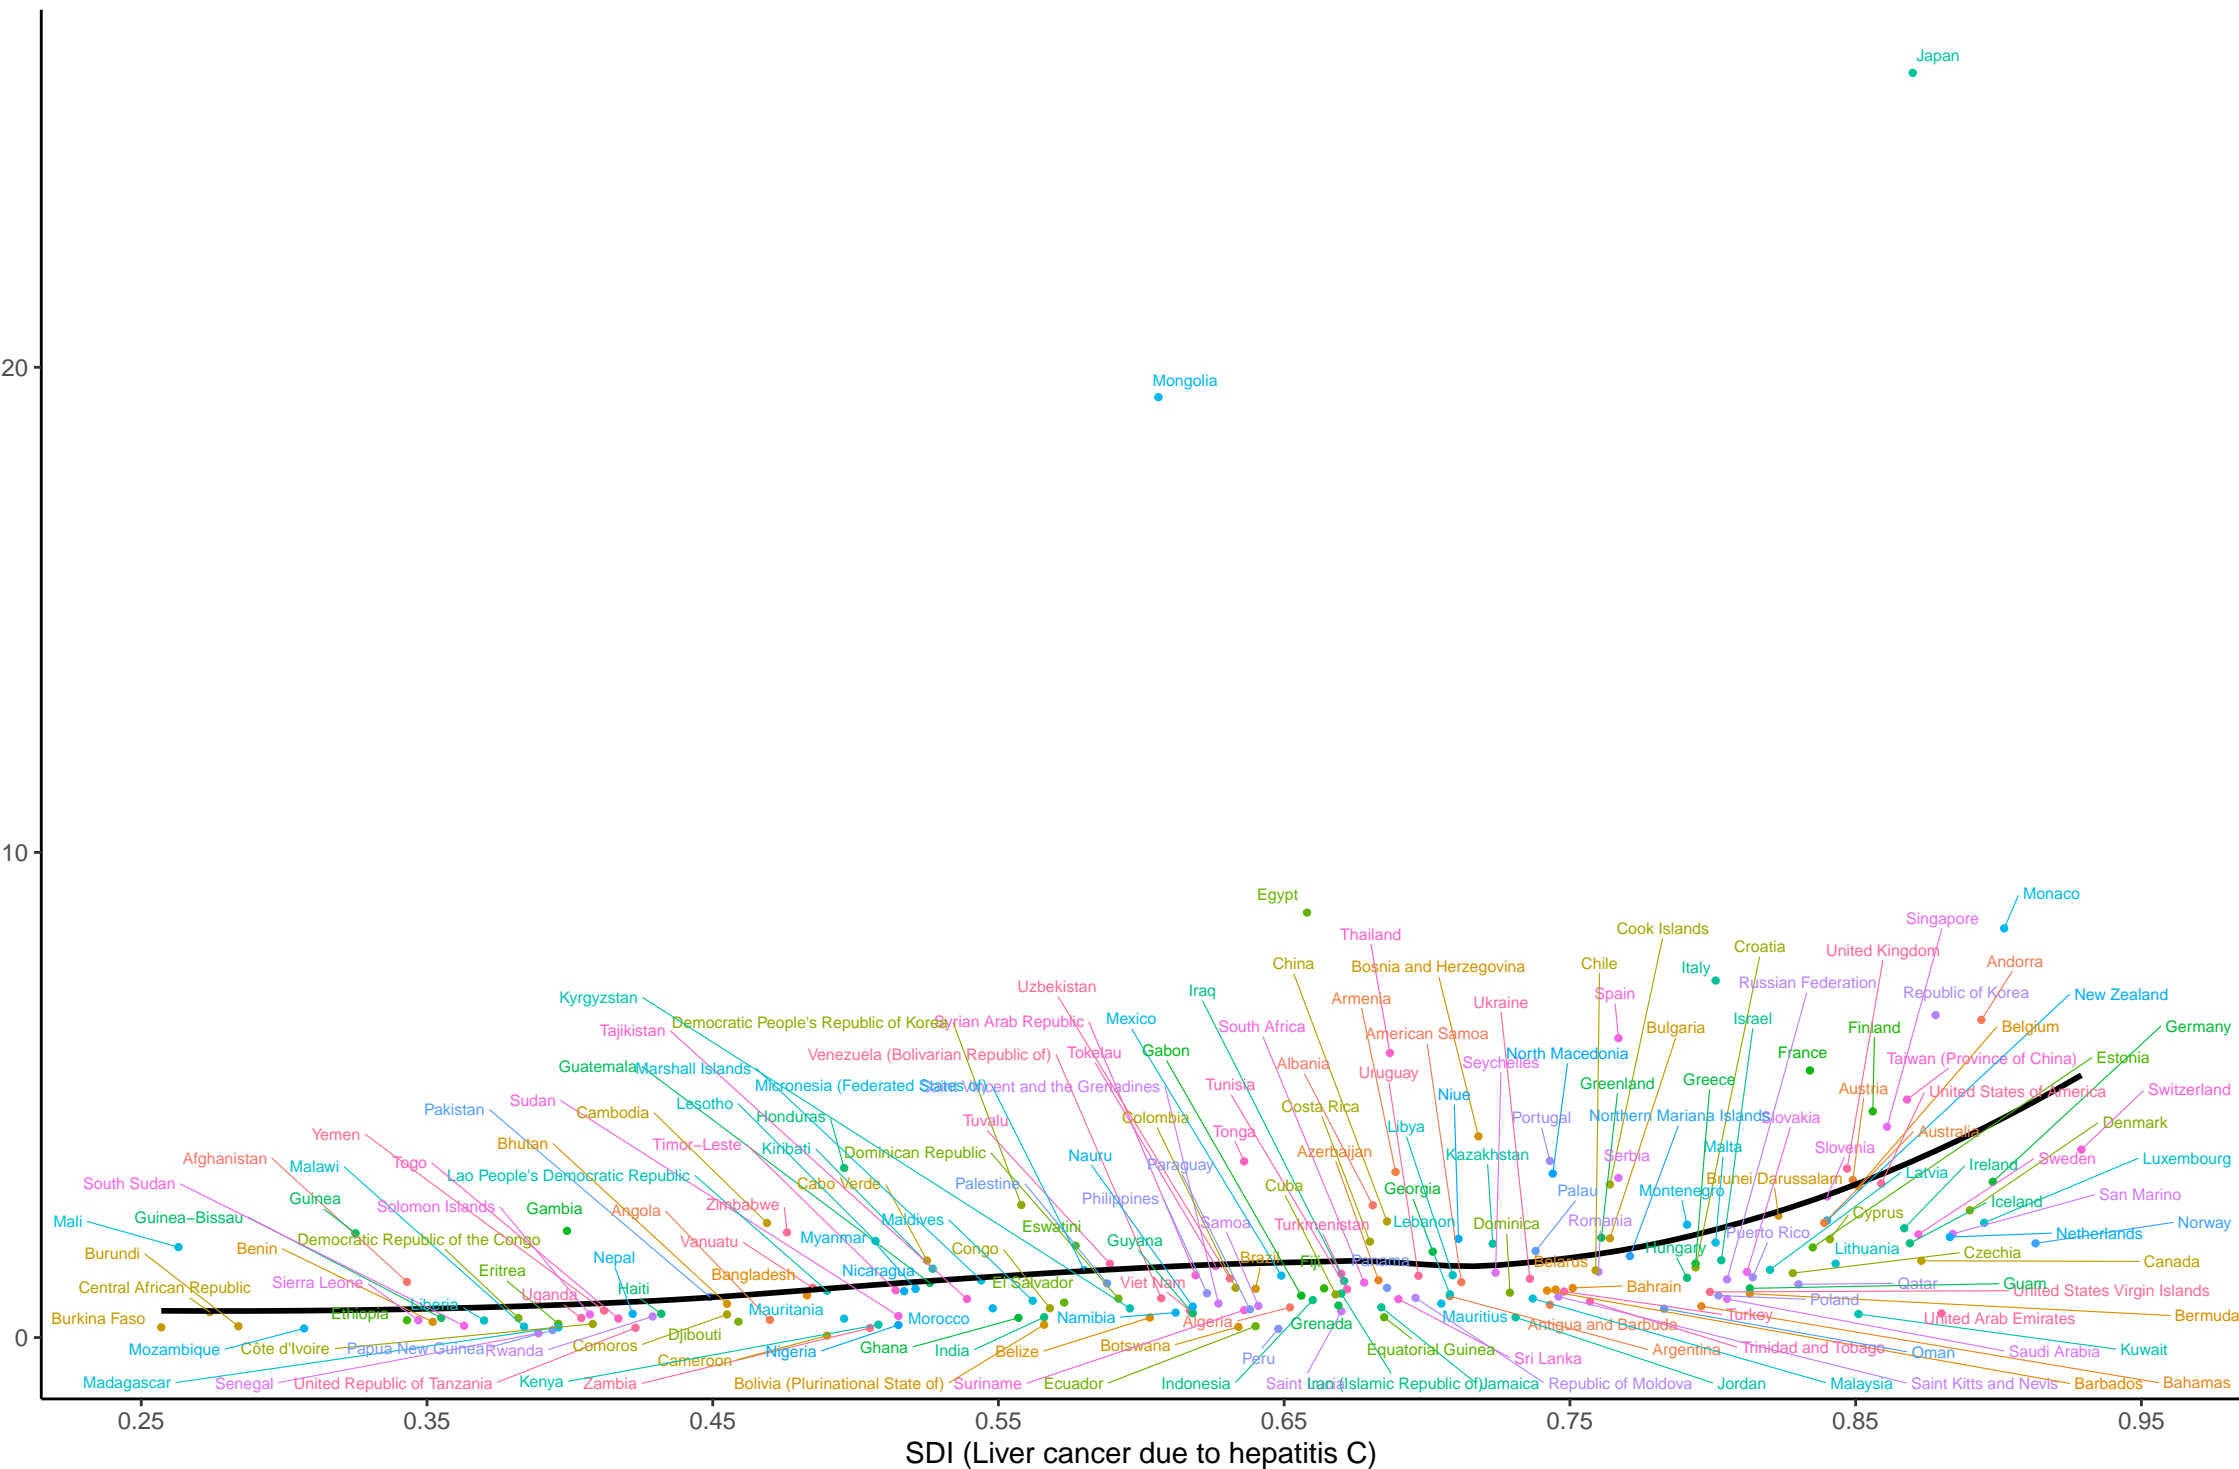

Incidence ASR and SDI in National level from 1990–2019

D

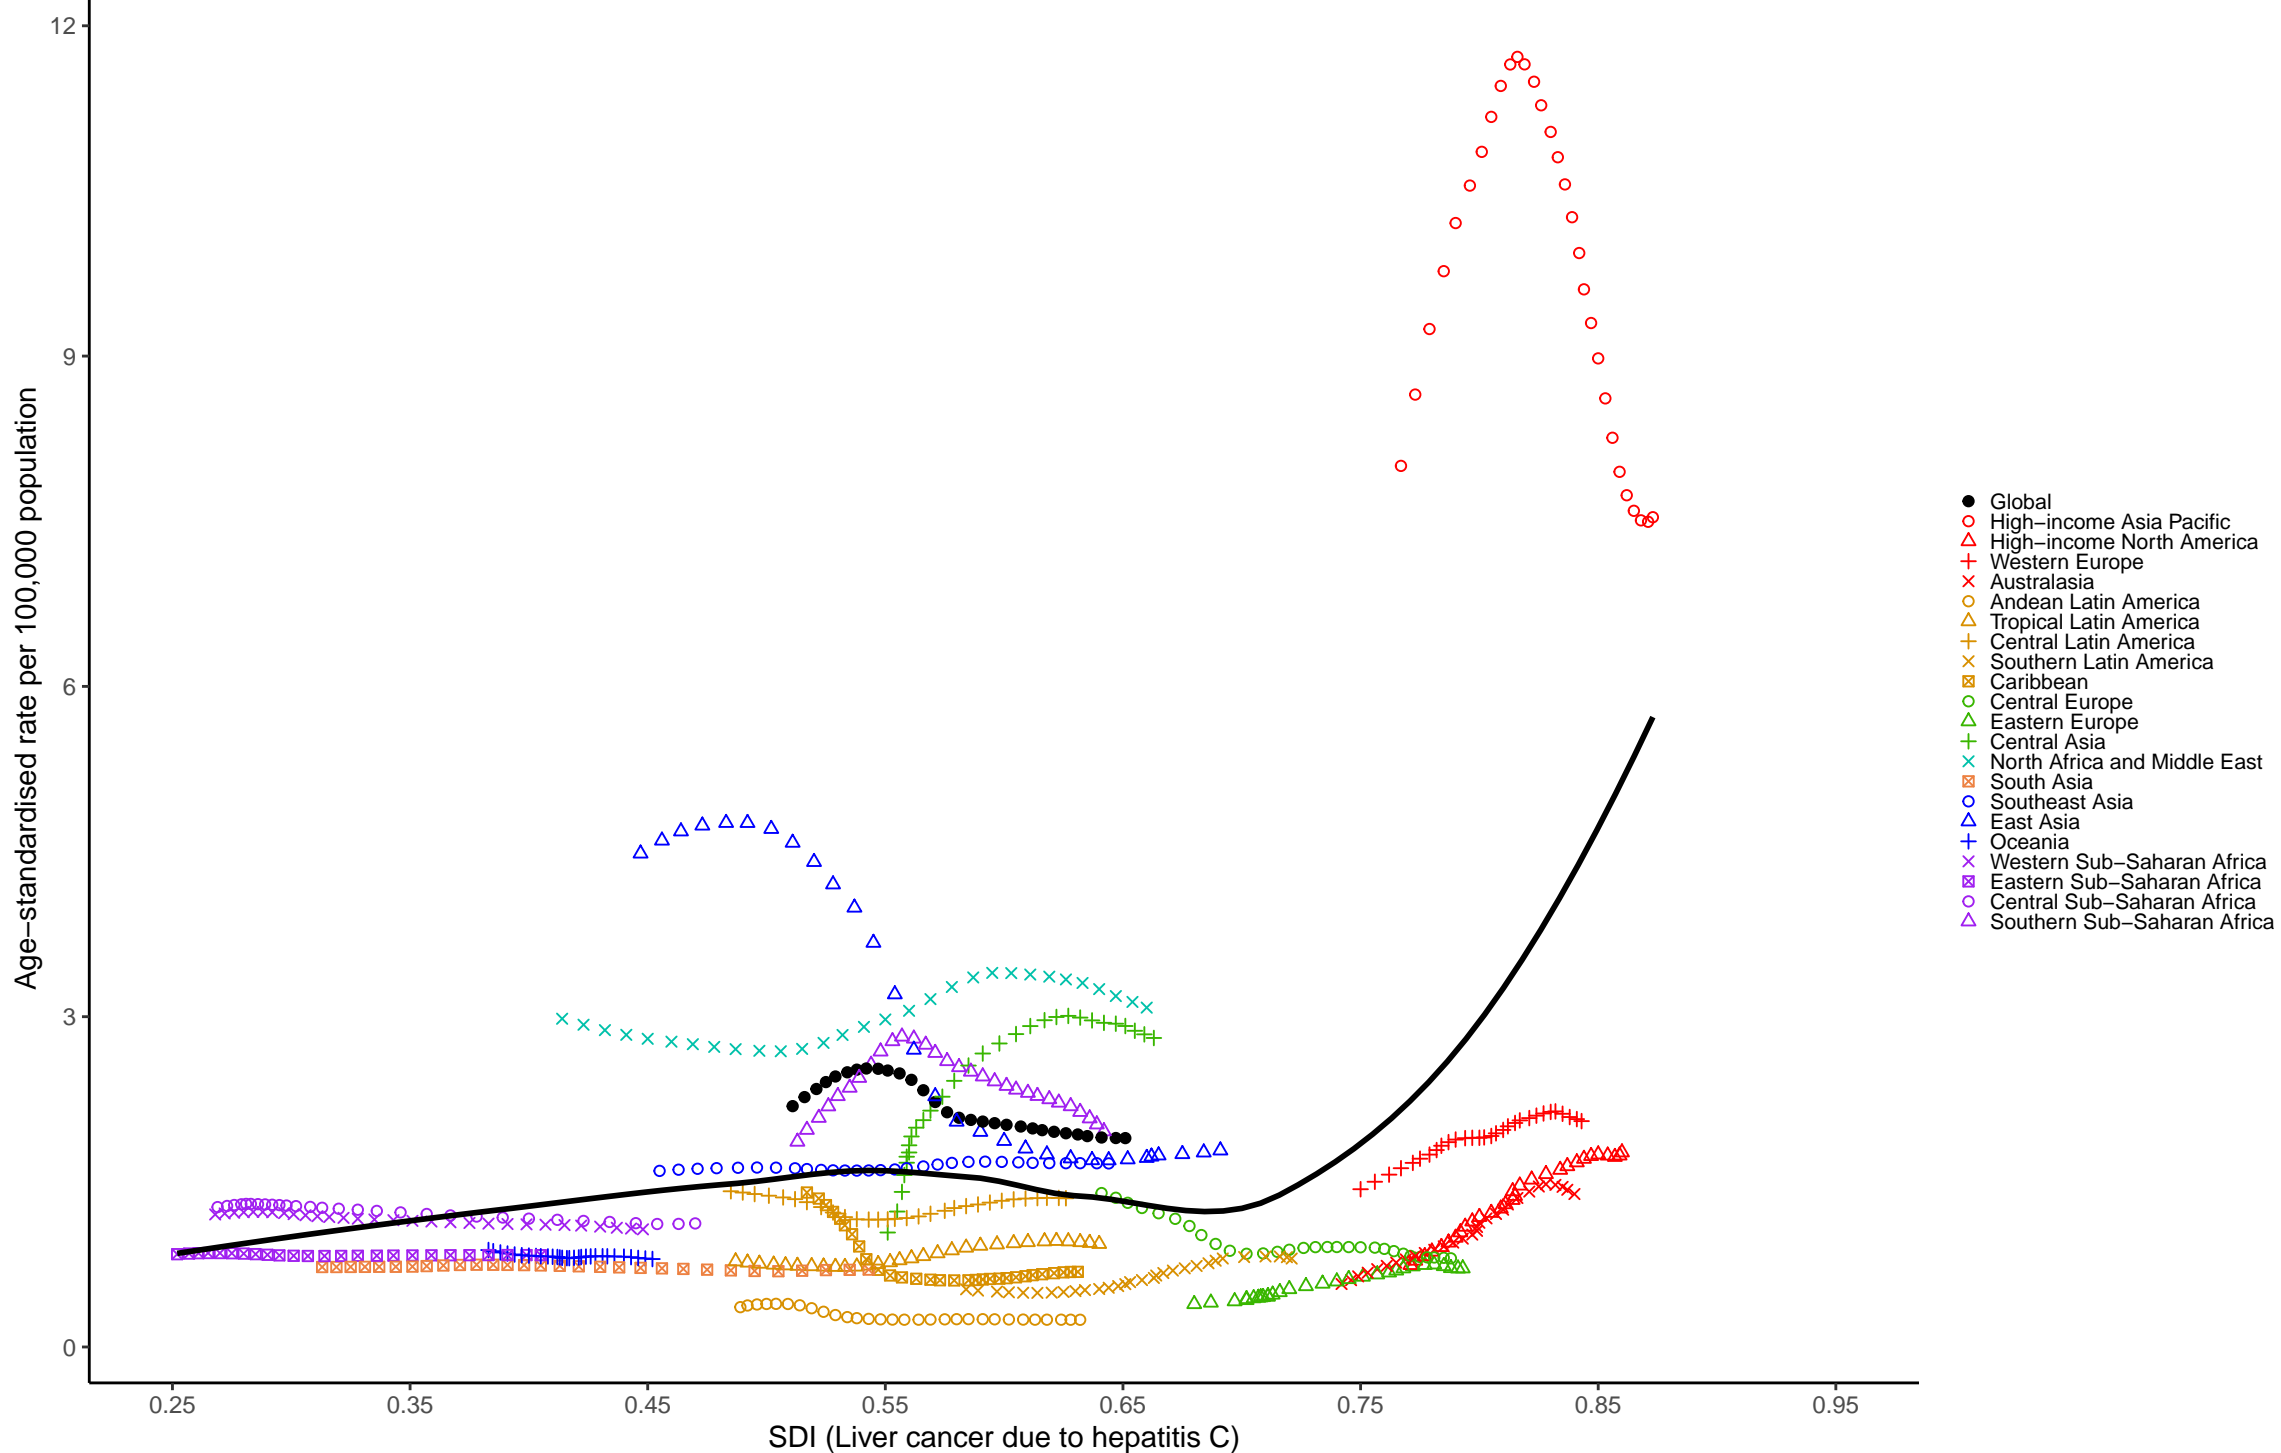

E Incidence ASR and SDI in National level

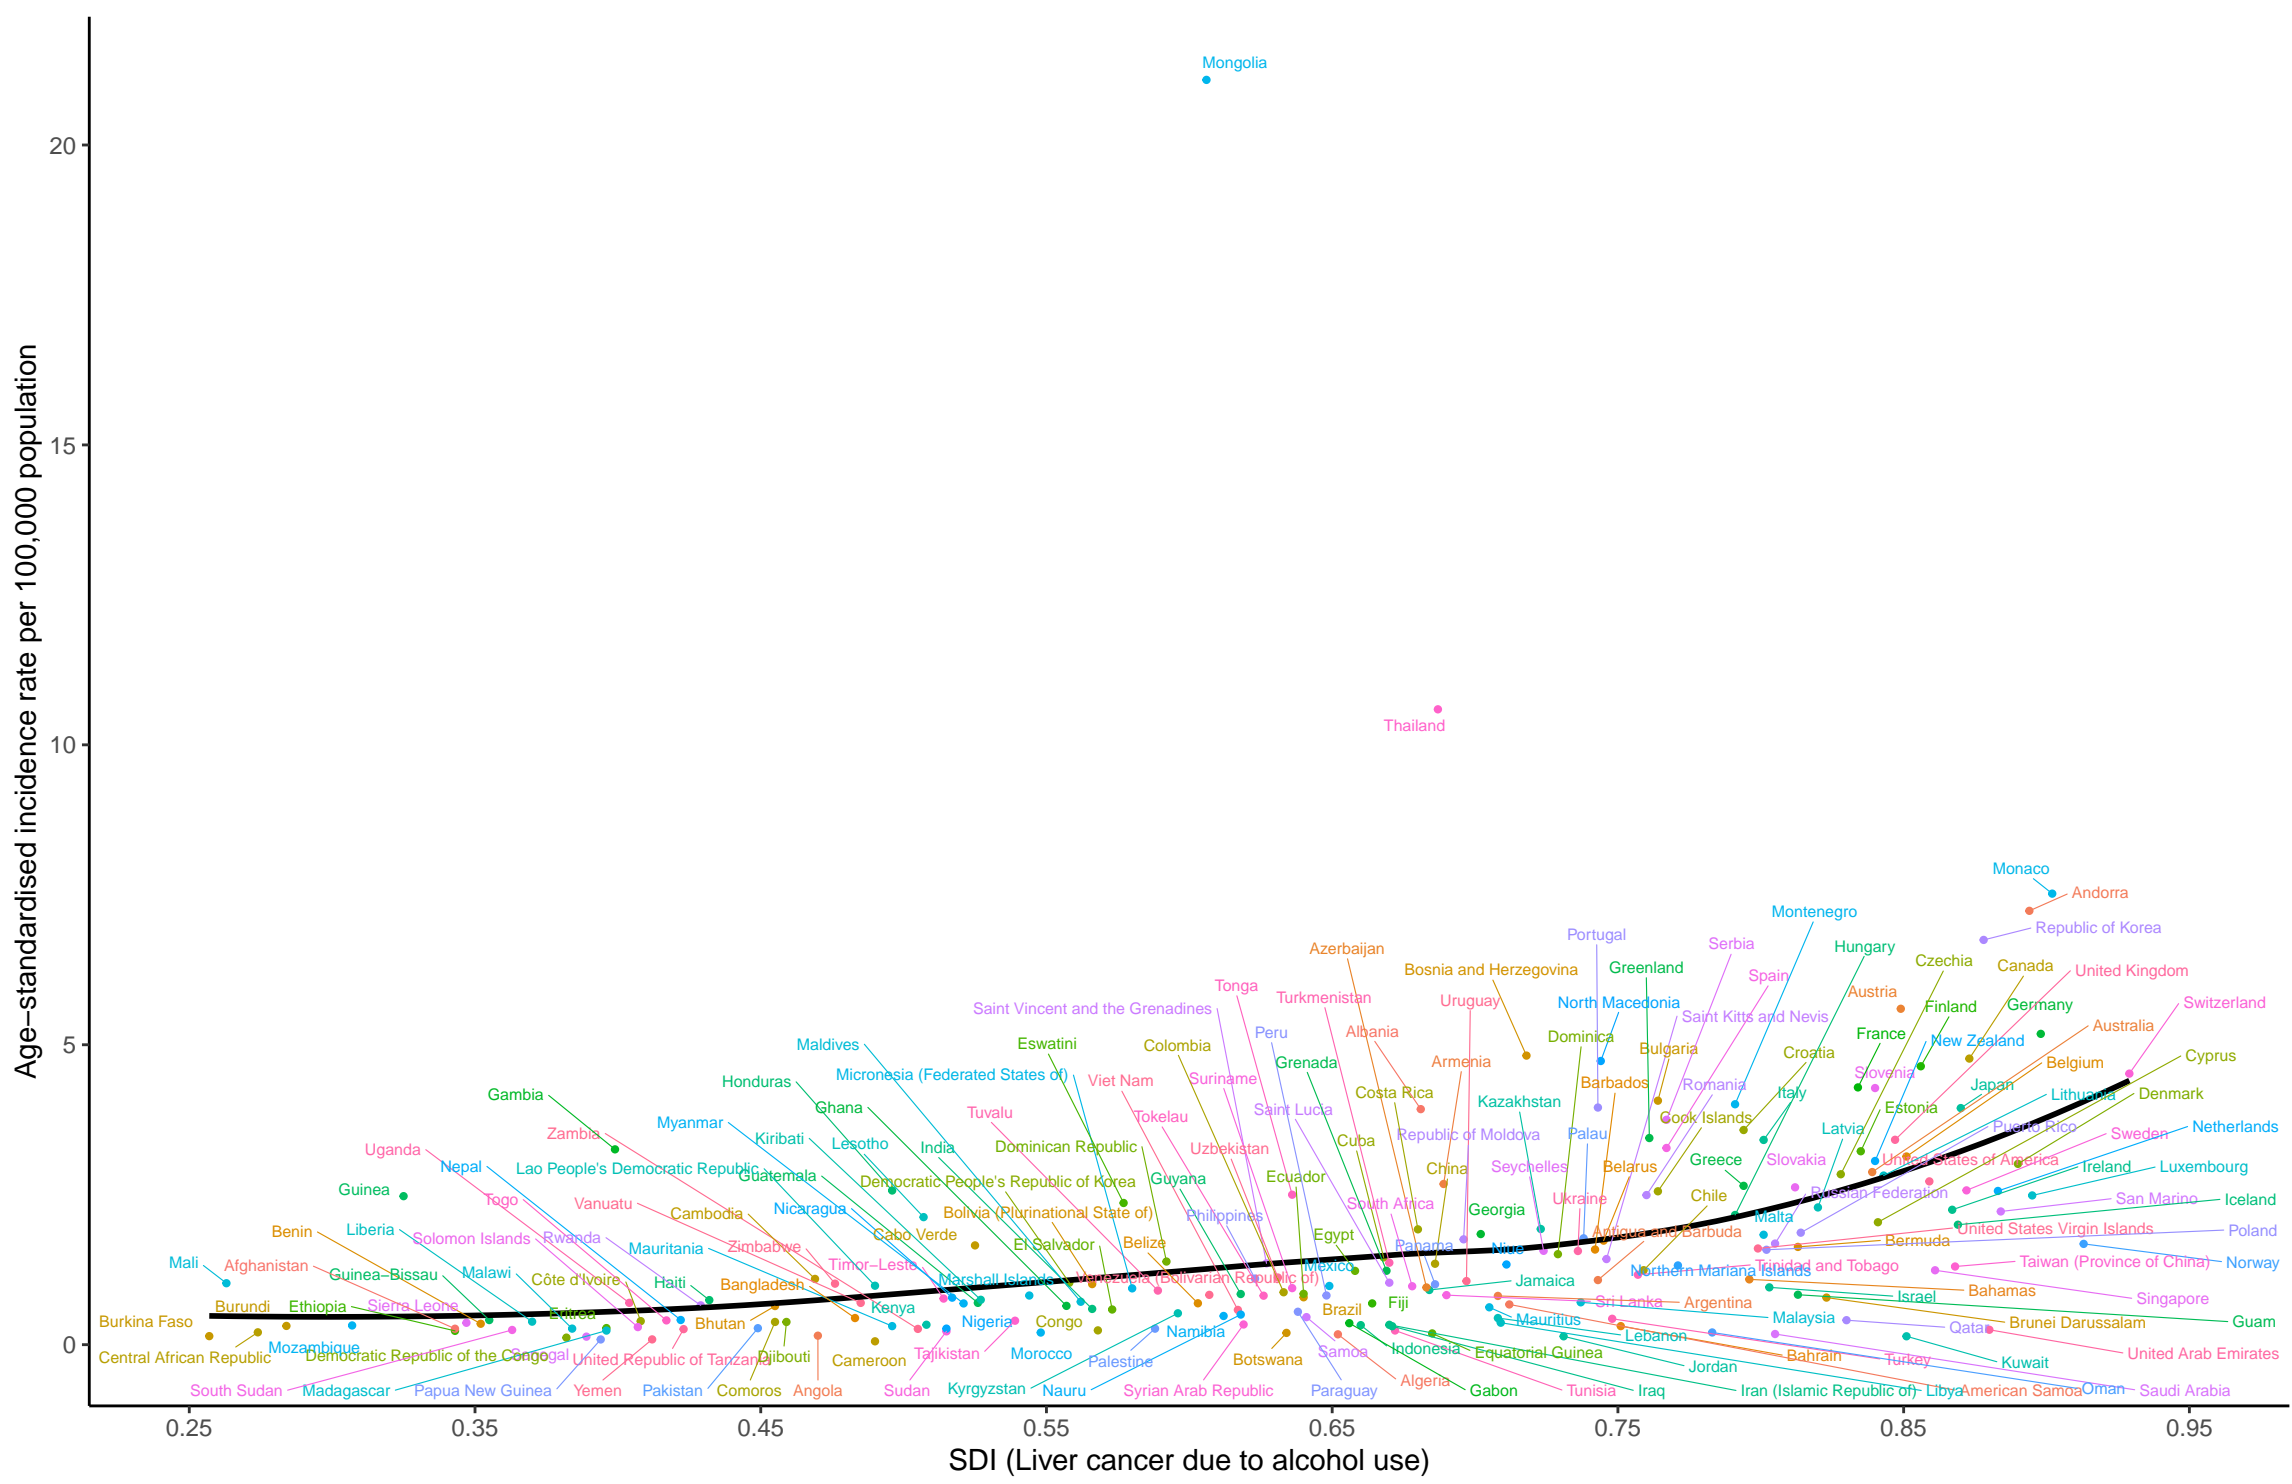

F Incidence ASR and SDI in National level from 1990–2019

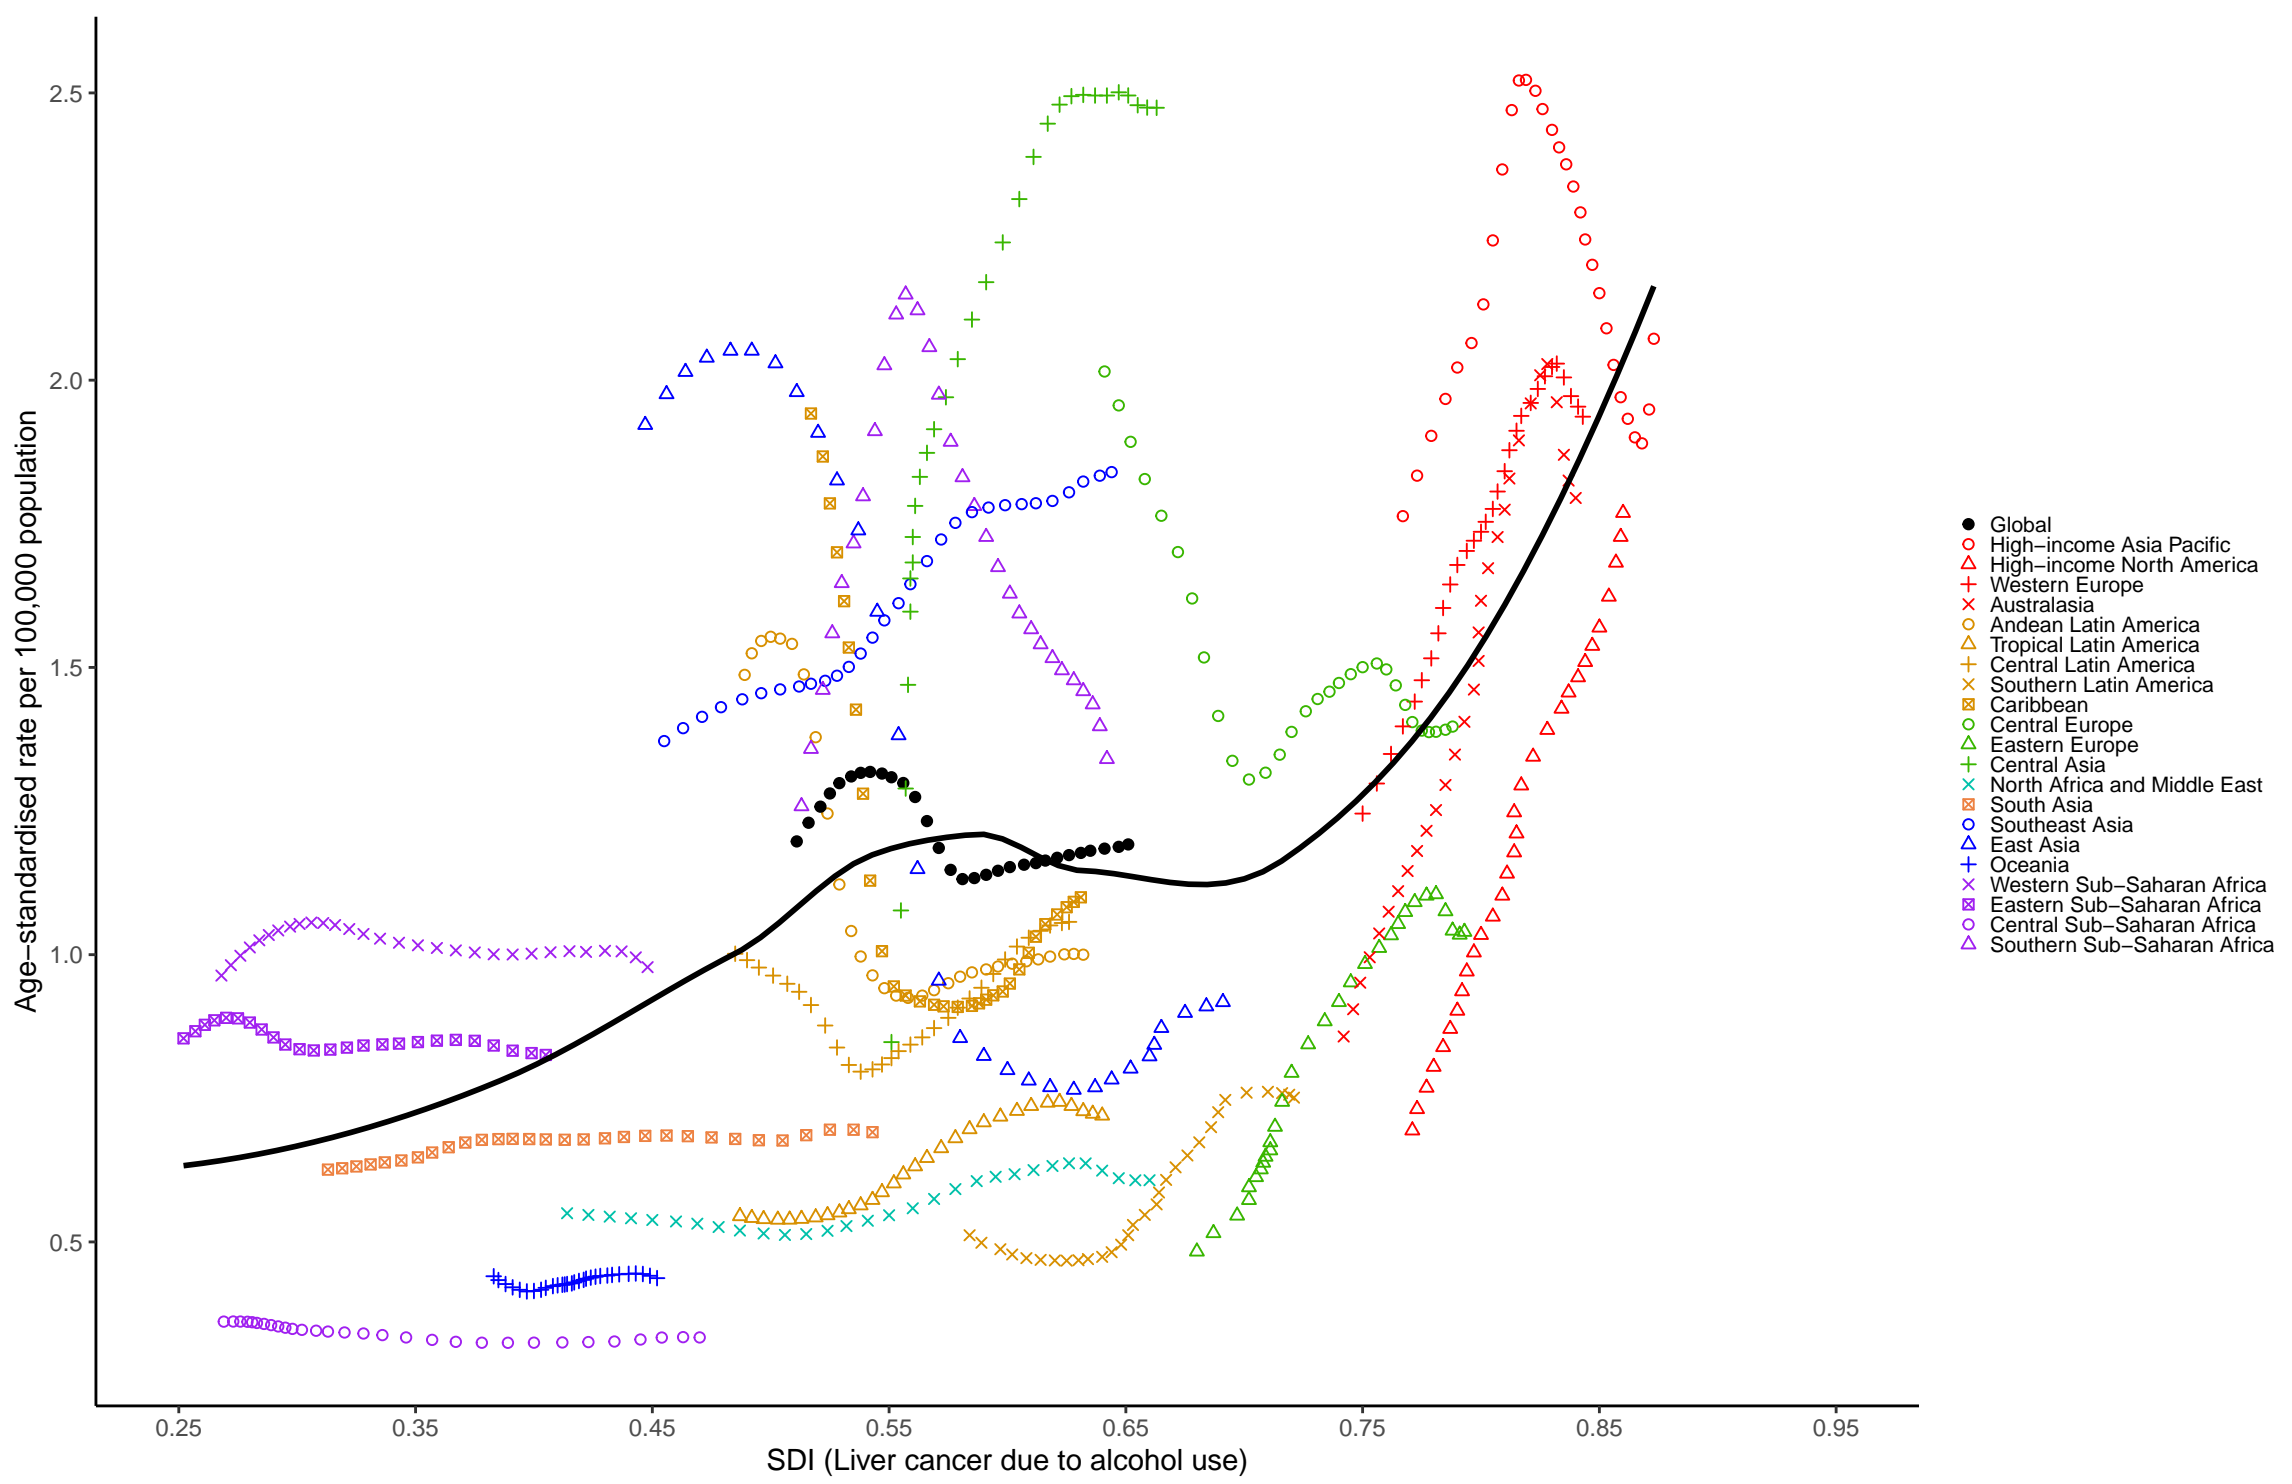

# G Incidence ASR and SDI in National level

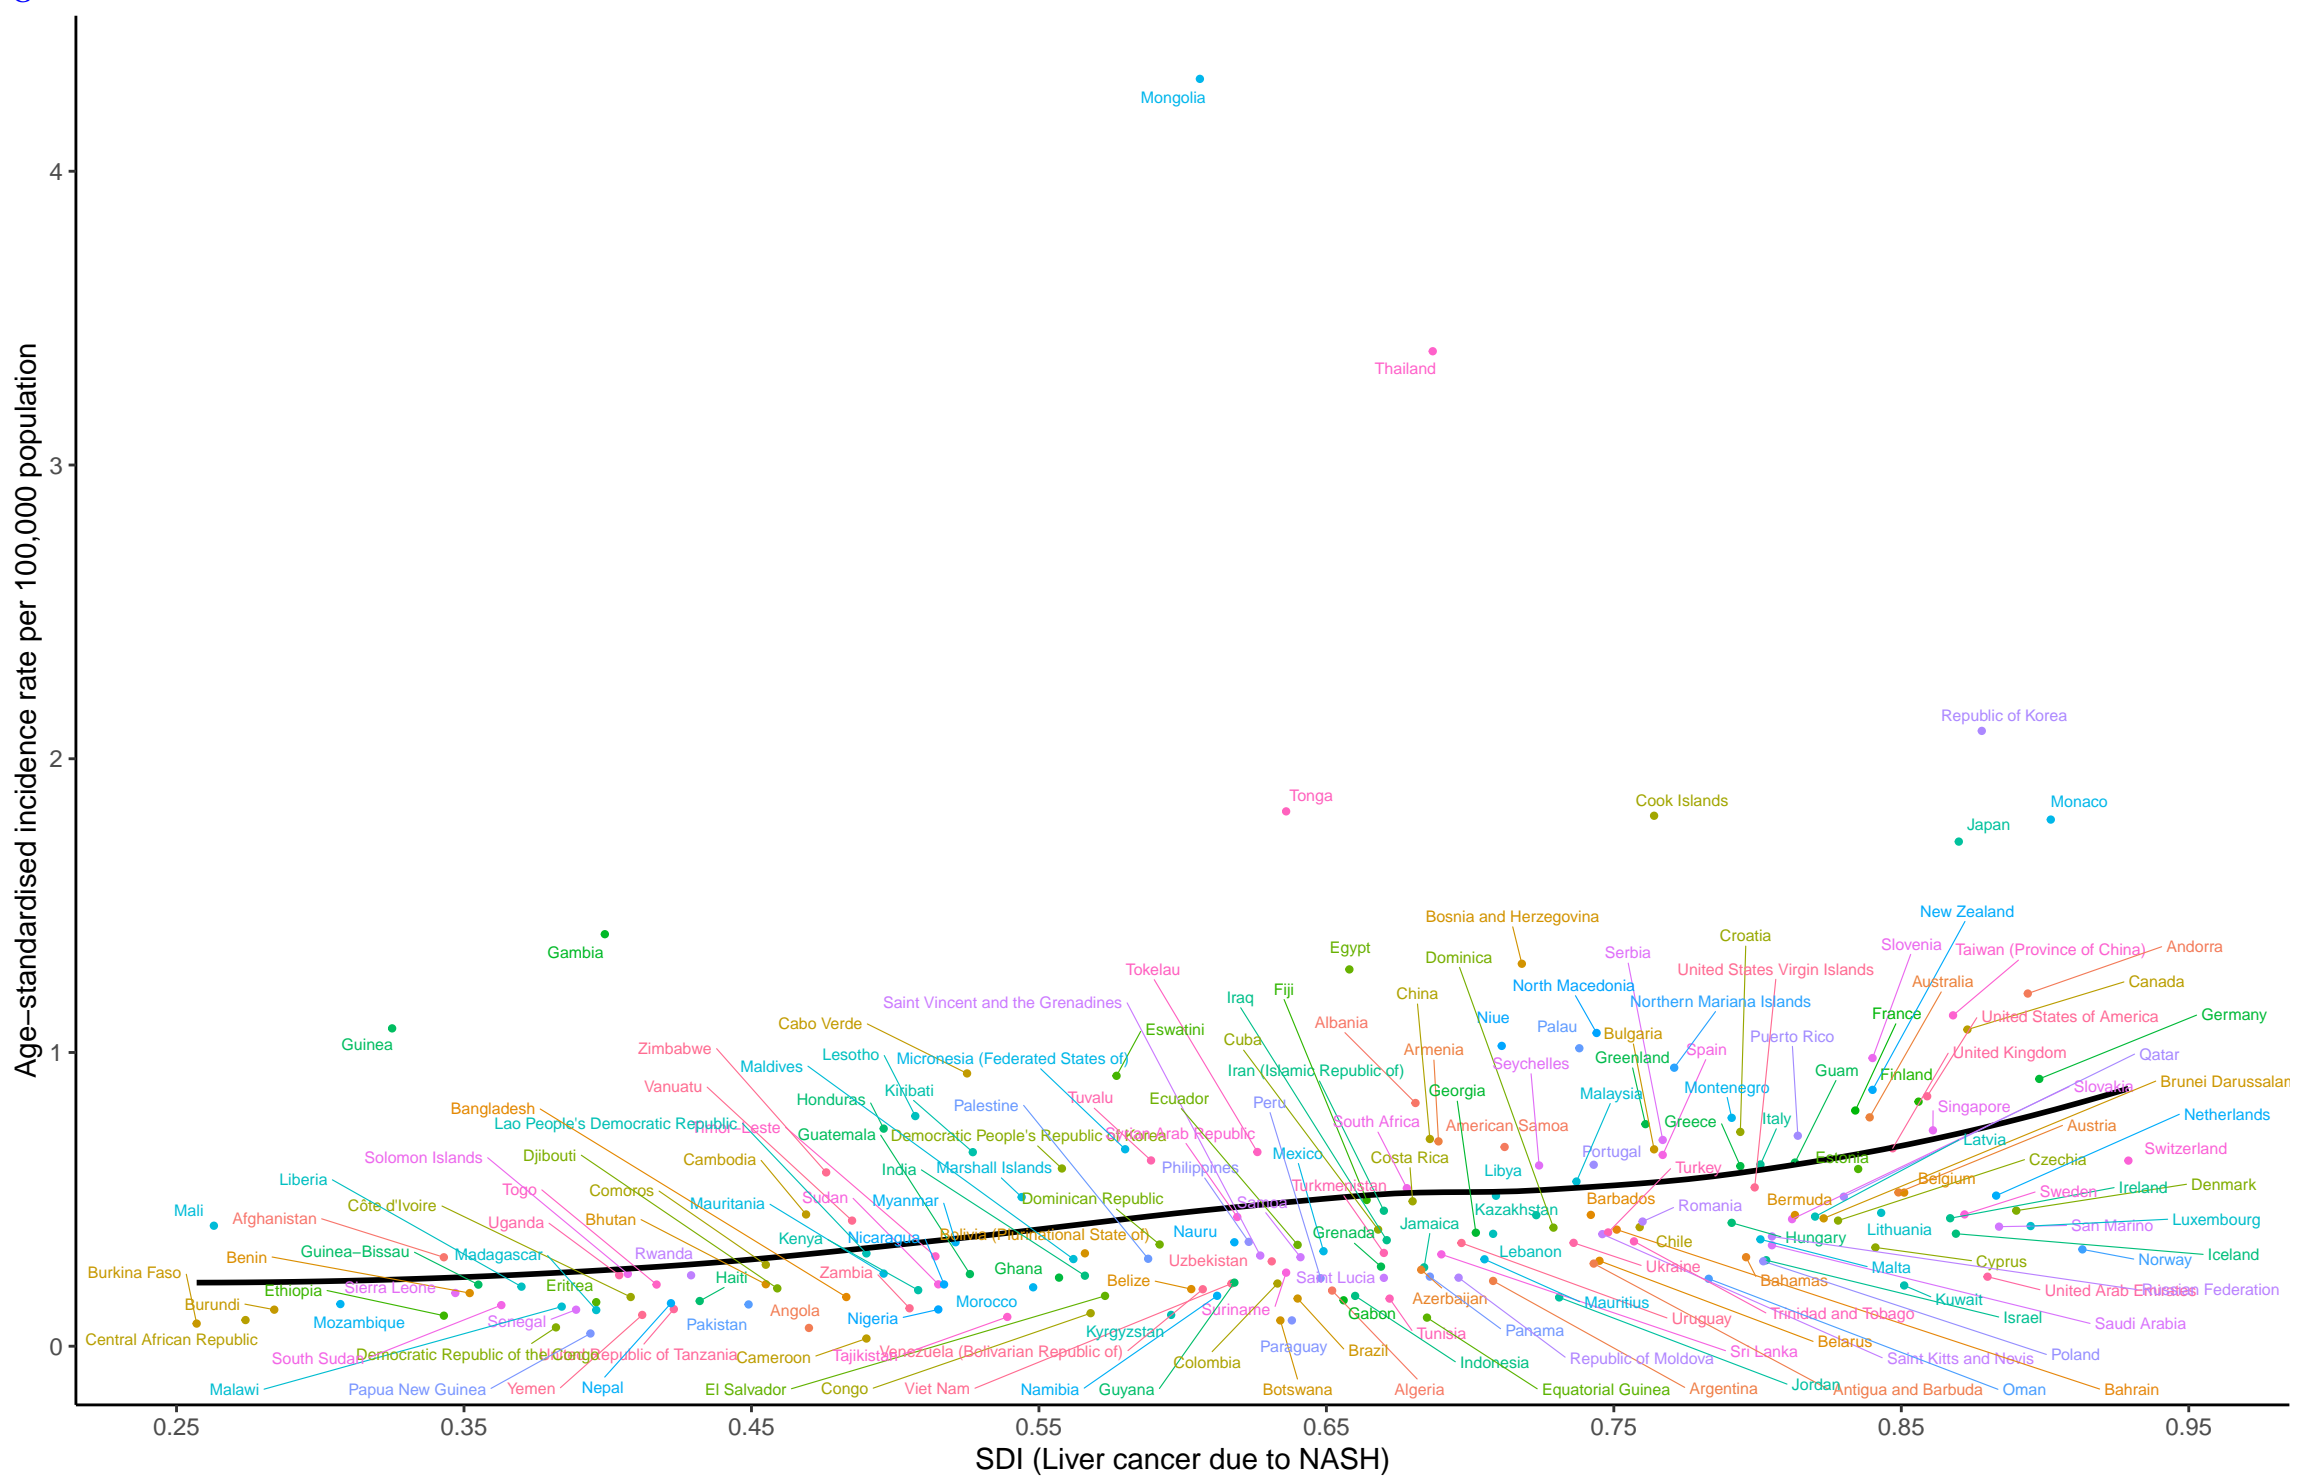

H

## Incidence ASR and SDI in National level from 1990–2019

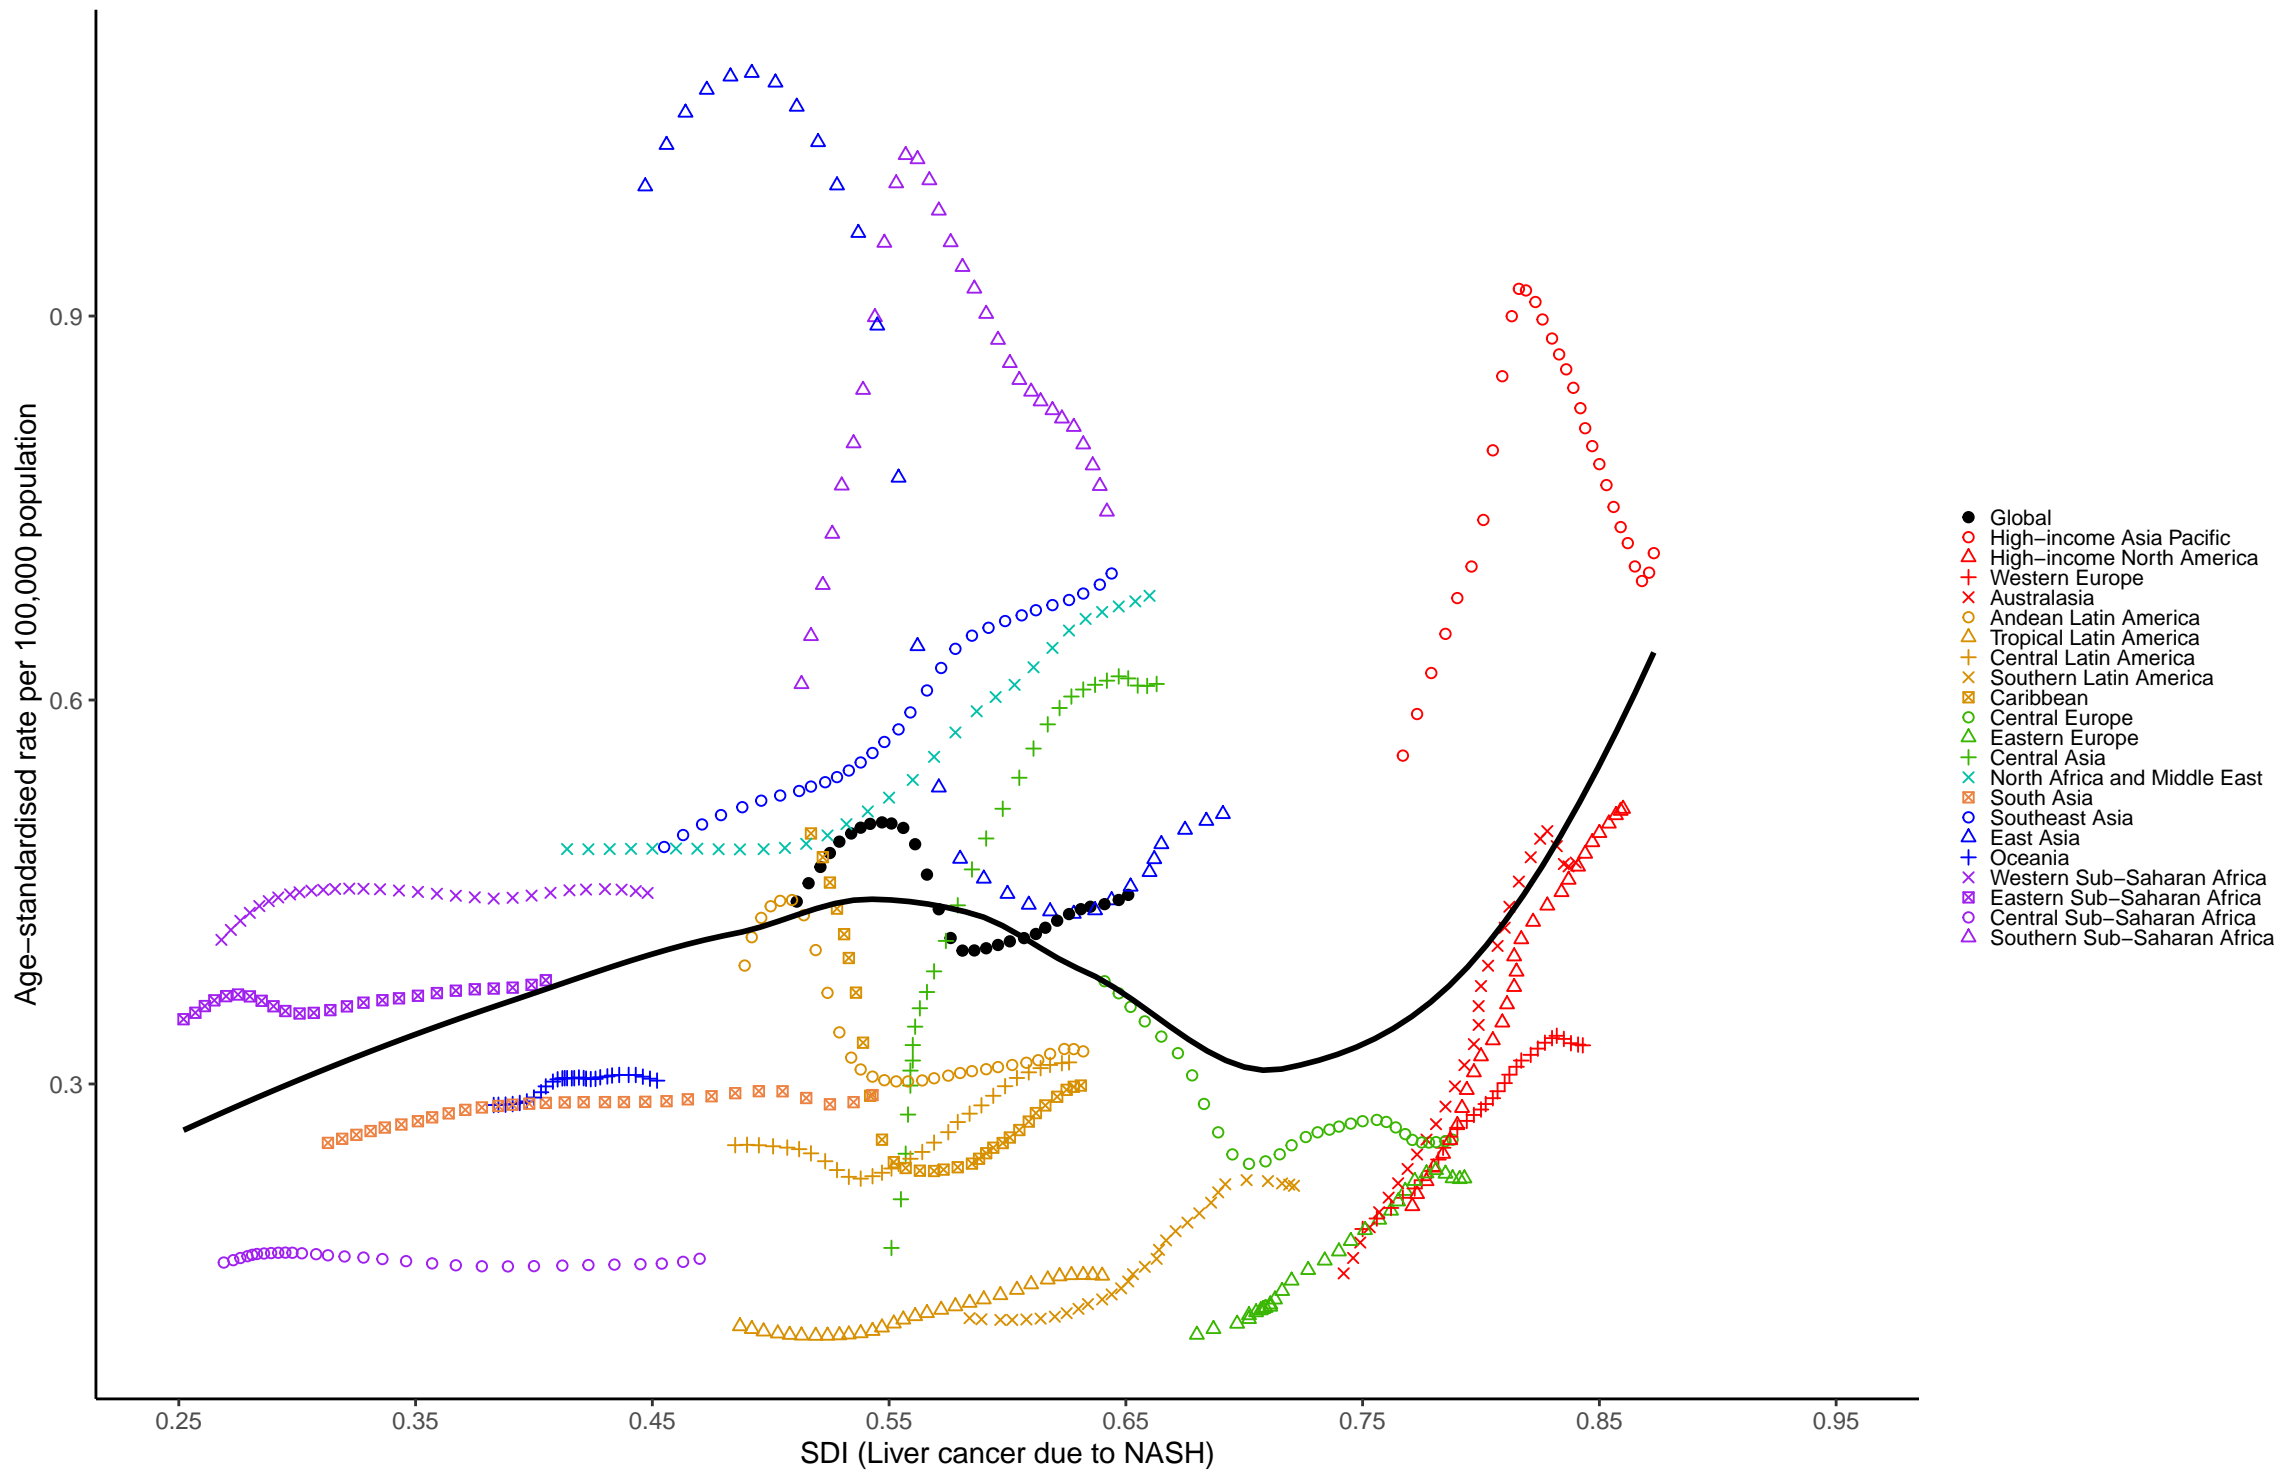





Incidence ASR and SDI in National level from 1990–2019

Age-standardised rate per 100,000 population

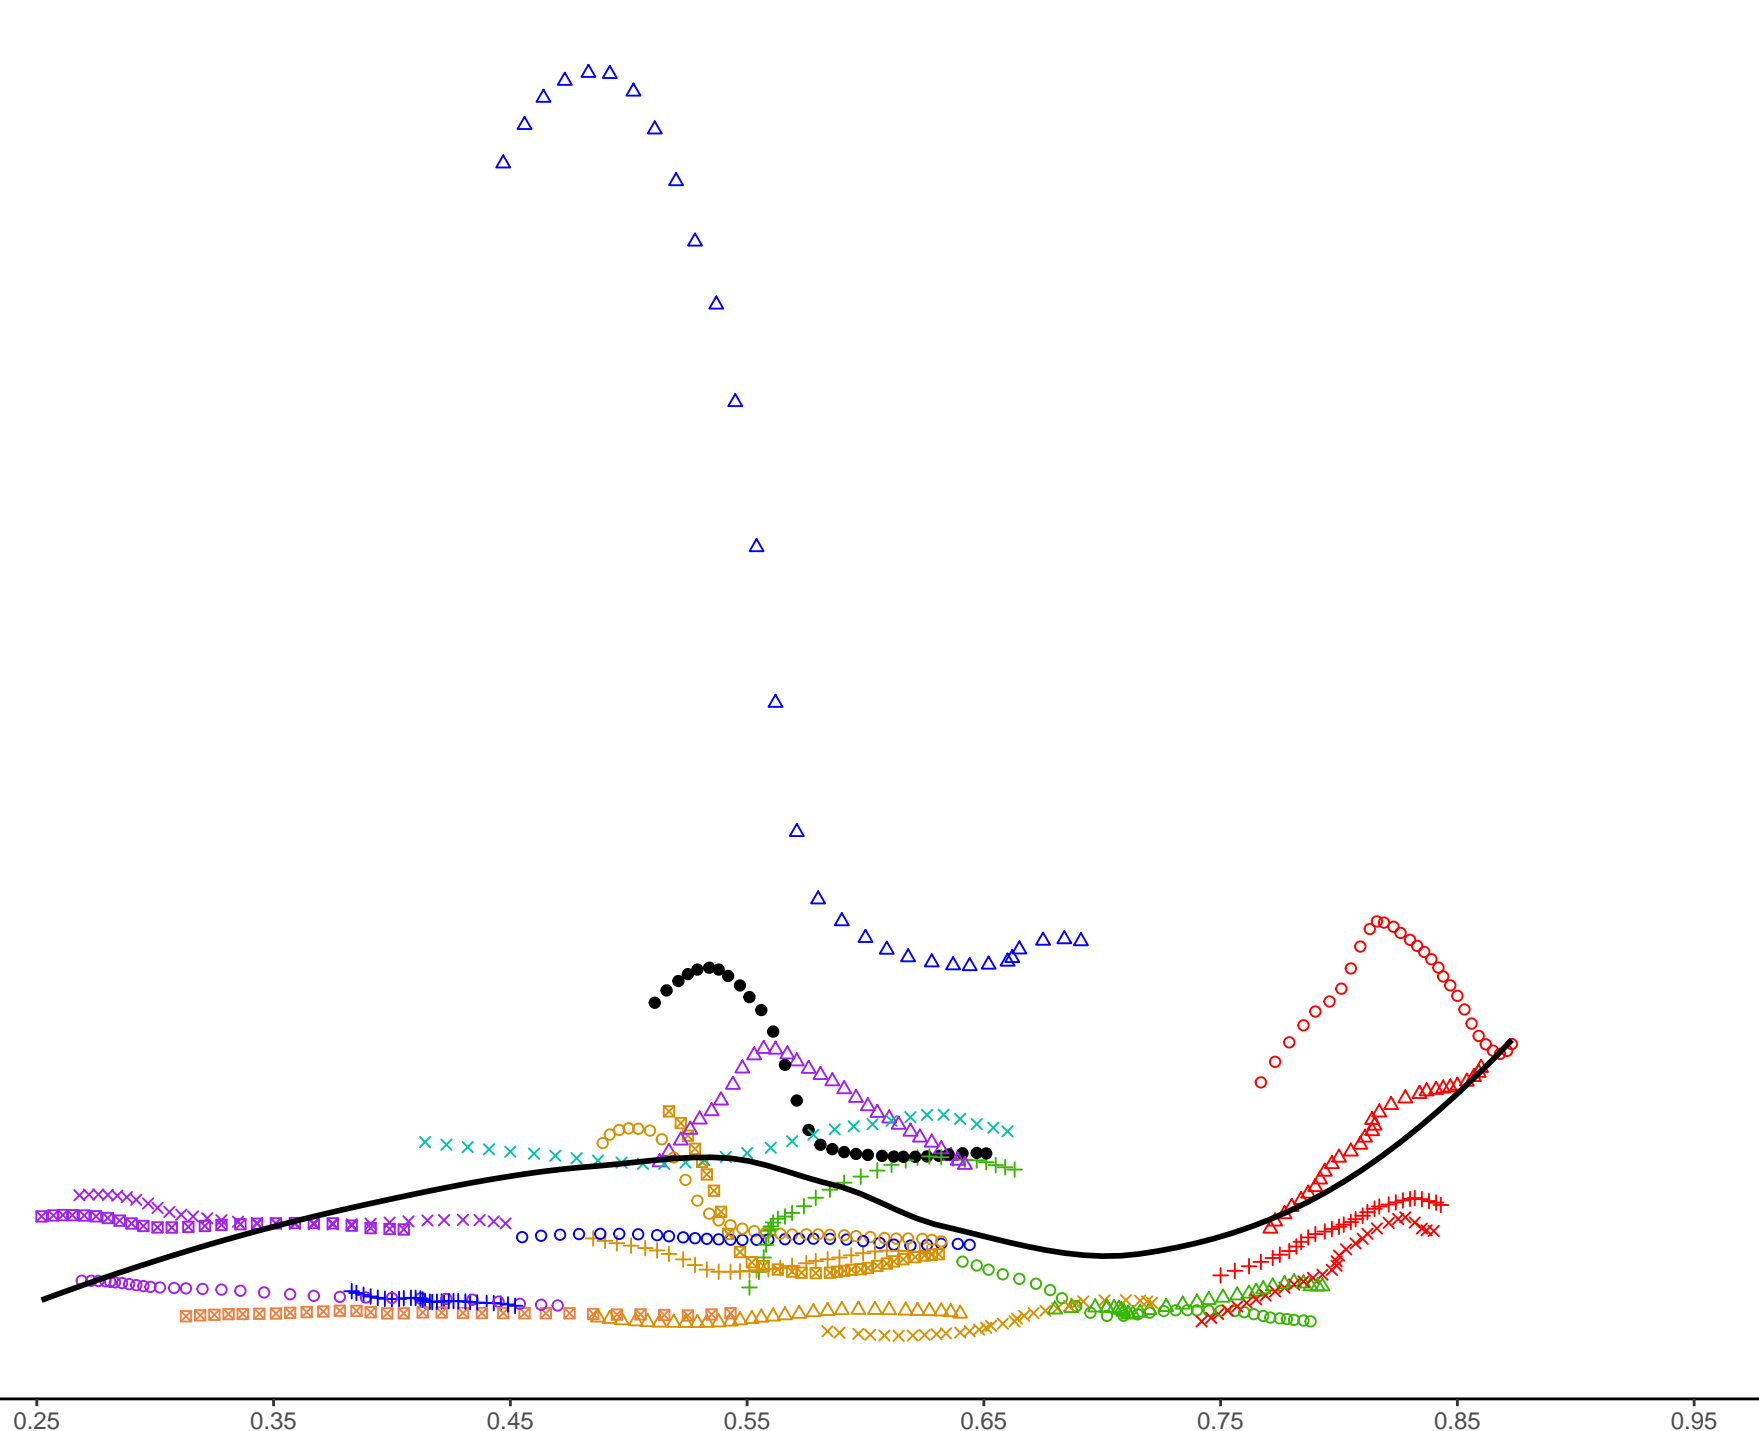

- Global
- High-income Asia Pacific
- △ High-income North America
- + Western Europe
- × Australasia
- Andean Latin America
- △ Tropical Latin America
- + Central Latin America
- × Southern Latin America
- ⊠ Caribbean
- Central Europe
- △ Eastern Europe
- + Central Asia
- × North Africa and Middle East
- ⊠ South Asia
- Southeast Asia
- △ East Asia
- + Oceania
- × Western Sub-Saharan Africa
- ⊠ Eastern Sub-Saharan Africa
- Central Sub-Saharan Africa
- △ Southern Sub-Saharan Africa

SDI (Liver cancer due to other causes)
